# Supplementary material for: Identification of Potential Key Genes Associated With the Pathogenesis and Prognosis of Gastric Cancer Based on Integrated Bioinformatics Analysis
Source: Front Genet. 2018 Jul 17;9:265. doi: 10.3389/fgene.2018.00265 (PMC6056647; doi:10.3389/fgene.2018.00265)
Supplement: Supplementary file 3 [file Table_3.XLSX]

## Sheet: Sheet1
TABLE S3 Information for the DEGs identified by the analysis of RNA sequencing data in the TCGA GC dataset (|log2FC| ≥ 1, P value < 0.05 and adjust P value < 0.05).
Name	logFC	logCPM	P value	FDR	Category
ENPP7|ENSG00000182156|protein_coding	-6.82257	2.51706	1.68488e-131	3.15274e-127	Down-regulated gene
ASAH2|ENSG00000188611|protein_coding	-4.44279	2.54788	2.7462e-122	2.56935e-118	Down-regulated gene
SYNPO2L|ENSG00000166317|protein_coding	-4.81458	0.618404	1.93102e-111	1.20444e-107	Down-regulated gene
FLG|ENSG00000143631|protein_coding	-6.07556	2.99011	4.88301e-103	2.28427e-99	Down-regulated gene
MS4A10|ENSG00000172689|protein_coding	-6.73348	2.06219	6.80009e-102	2.54487e-98	Down-regulated gene
S100G|ENSG00000169906|protein_coding	-5.67219	0.289155	2.58374e-97	8.05781e-94	Down-regulated gene
ALOX12|ENSG00000108839|protein_coding	-3.88885	2.54028	4.1923e-90	1.12066e-86	Down-regulated gene
KRT1|ENSG00000167768|protein_coding	-5.89801	1.50373	2.10166e-85	4.91578e-82	Down-regulated gene
MEP1B|ENSG00000141434|protein_coding	-5.88958	3.24225	2.82277e-85	5.86886e-82	Down-regulated gene
ENPP3|ENSG00000154269|protein_coding	-4.40647	1.41557	2.02595e-84	3.79096e-81	Down-regulated gene
TREH|ENSG00000118094|protein_coding	-3.98433	1.79748	2.66144e-81	4.52734e-78	Down-regulated gene
CA7|ENSG00000168748|protein_coding	-4.49879	-0.525161	6.93388e-80	1.08122e-76	Down-regulated gene
SLC28A1|ENSG00000156222|protein_coding	-4.91303	0.219153	4.10329e-79	5.90621e-76	Down-regulated gene
CLEC3B|ENSG00000163815|protein_coding	-3.39799	2.82715	6.32654e-77	8.45588e-74	Down-regulated gene
AQP10|ENSG00000143595|protein_coding	-5.88114	1.72445	7.47759e-77	9.32805e-74	Down-regulated gene
ZG16|ENSG00000174992|protein_coding	-5.53013	2.37642	4.81267e-71	5.62842e-68	Down-regulated gene
RBP2|ENSG00000114113|protein_coding	-6.03849	5.45449	1.26887e-70	1.39665e-67	Down-regulated gene
SLC2A5|ENSG00000142583|protein_coding	-3.31115	3.39929	1.15713e-69	1.20291e-66	Down-regulated gene
SLC5A4|ENSG00000100191|protein_coding	-3.39475	0.0900093	3.20955e-69	3.1609e-66	Down-regulated gene
CBR1|ENSG00000159228|protein_coding	-2.30118	5.67373	4.93626e-67	4.61837e-64	Down-regulated gene
EMP1|ENSG00000134531|protein_coding	-3.20148	7.95051	7.27315e-65	6.48072e-62	Down-regulated gene
BEST4|ENSG00000142959|protein_coding	-3.33707	0.410902	1.21787e-62	1.03586e-59	Down-regulated gene
DPT|ENSG00000143196|protein_coding	-3.87706	4.23882	1.27603e-62	1.03813e-59	Down-regulated gene
LCT|ENSG00000115850|protein_coding	-5.54572	2.33546	1.11669e-61	8.70645e-59	Down-regulated gene
NAALADL1|ENSG00000168060|protein_coding	-3.0613	2.94079	9.31371e-58	6.97113e-55	Down-regulated gene
SLC25A34|ENSG00000162461|protein_coding	-2.89014	1.6059	7.5063e-57	5.40222e-54	Down-regulated gene
GIP|ENSG00000159224|protein_coding	-5.68396	0.995618	3.94033e-56	2.7308e-53	Down-regulated gene
SLC6A4|ENSG00000108576|protein_coding	-3.80918	1.27913	1.31955e-55	8.81834e-53	Down-regulated gene
GPM6B|ENSG00000046653|protein_coding	-2.81586	3.20659	1.43867e-55	9.28287e-53	Down-regulated gene
BTG2|ENSG00000159388|protein_coding	-2.38086	7.67001	5.05107e-55	3.15052e-52	Down-regulated gene
KHK|ENSG00000138030|protein_coding	-2.65478	3.4885	6.37409e-54	3.74511e-51	Down-regulated gene
GAST|ENSG00000184502|protein_coding	-7.17811	6.93539	6.40463e-54	3.74511e-51	Down-regulated gene
BNIPL|ENSG00000163141|protein_coding	-4.06083	1.69638	8.97581e-54	5.08956e-51	Down-regulated gene
UNC45B|ENSG00000141161|protein_coding	-3.88108	-0.117438	9.30355e-54	5.12024e-51	Down-regulated gene
ACER1|ENSG00000167769|protein_coding	-4.92583	-0.084342	1.84252e-53	9.85063e-51	Down-regulated gene
SLC2A7|ENSG00000197241|protein_coding	-4.20284	-2.36686	3.14807e-53	1.6363e-50	Down-regulated gene
PCK2|ENSG00000100889|protein_coding	-2.2826	5.68947	4.7917e-53	2.42331e-50	Down-regulated gene
TTC36|ENSG00000172425|protein_coding	-2.87331	-0.303843	6.04018e-53	2.97431e-50	Down-regulated gene
GYS2|ENSG00000111713|protein_coding	-4.7856	-0.0381054	1.2887e-52	6.18311e-50	Down-regulated gene
ZNF365|ENSG00000138311|protein_coding	-3.68953	1.56059	1.81431e-52	8.48735e-50	Down-regulated gene
G6PC|ENSG00000131482|protein_coding	-5.2102	0.0276776	4.56082e-51	2.08151e-48	Down-regulated gene
SLC51A|ENSG00000163959|protein_coding	-2.75301	2.36501	2.37861e-50	1.05973e-47	Down-regulated gene
RAET1E|ENSG00000164520|protein_coding	-3.73342	1.05179	3.9435e-50	1.71606e-47	Down-regulated gene
LYVE1|ENSG00000133800|protein_coding	-2.9438	2.98895	4.84982e-50	2.0625e-47	Down-regulated gene
INAFM2|ENSG00000259330|protein_coding	-2.37519	3.28383	6.7891e-50	2.82306e-47	Down-regulated gene
GLTP|ENSG00000139433|protein_coding	-1.85938	5.67413	1.20428e-49	4.89879e-47	Down-regulated gene
PPL|ENSG00000118898|protein_coding	-3.42934	7.68105	2.00335e-48	7.9759e-46	Down-regulated gene
CFD|ENSG00000197766|protein_coding	-2.93782	5.65792	2.26167e-48	8.81674e-46	Down-regulated gene
CSRNP1|ENSG00000144655|protein_coding	-1.89505	5.71487	9.62952e-48	3.6773e-45	Down-regulated gene
MYOC|ENSG00000034971|protein_coding	-5.10671	3.54359	3.61325e-47	1.35222e-44	Down-regulated gene
GADD45B|ENSG00000099860|protein_coding	-2.22037	5.39602	8.47598e-47	3.10985e-44	Down-regulated gene
LGI3|ENSG00000168481|protein_coding	-4.1183	-0.12048	1.06674e-46	3.83862e-44	Down-regulated gene
ENDOU|ENSG00000111405|protein_coding	-4.80551	2.04748	2.02389e-46	7.14546e-44	Down-regulated gene
ASPDH|ENSG00000204653|protein_coding	-2.80164	-0.924475	2.10512e-46	7.29462e-44	Down-regulated gene
DEFB131A|ENSG00000186146|protein_coding	-5.52678	-3.39494	2.04426e-45	6.95495e-43	Down-regulated gene
MTTP|ENSG00000138823|protein_coding	-4.66056	4.85819	3.29742e-45	1.10181e-42	Down-regulated gene
VSIG10L|ENSG00000186806|protein_coding	-3.47717	4.33472	3.41661e-45	1.12161e-42	Down-regulated gene
PPP1R1A|ENSG00000135447|protein_coding	-3.98682	2.99932	4.57238e-45	1.47514e-42	Down-regulated gene
CMTM5|ENSG00000166091|protein_coding	-3.6952	-1.76505	5.75974e-45	1.82672e-42	Down-regulated gene
JCHAIN|ENSG00000132465|protein_coding	-3.78407	9.75828	7.02431e-45	2.19065e-42	Down-regulated gene
MGAM|ENSG00000257335|protein_coding	-3.63775	3.85593	8.62335e-45	2.64525e-42	Down-regulated gene
APOA4|ENSG00000110244|protein_coding	-6.44863	6.90299	1.64728e-44	4.97159e-42	Down-regulated gene
CITED2|ENSG00000164442|protein_coding	-1.69817	5.70874	1.70169e-44	5.05428e-42	Down-regulated gene
PRR4|ENSG00000111215|protein_coding	-3.35117	2.29635	2.71231e-44	7.93011e-42	Down-regulated gene
OTOP3|ENSG00000182938|protein_coding	-4.96768	2.38114	3.71696e-44	1.07003e-41	Down-regulated gene
ACE|ENSG00000159640|protein_coding	-2.13365	5.84354	1.13693e-42	3.22338e-40	Down-regulated gene
SPINK5|ENSG00000133710|protein_coding	-4.46315	6.83078	1.16408e-42	3.25109e-40	Down-regulated gene
ECM1|ENSG00000143369|protein_coding	-3.02698	6.75987	1.38356e-42	3.80722e-40	Down-regulated gene
CYP3A4|ENSG00000160868|protein_coding	-4.70676	4.08999	1.467e-42	3.97835e-40	Down-regulated gene
CSTA|ENSG00000121552|protein_coding	-4.5923	6.67075	2.13404e-42	5.70459e-40	Down-regulated gene
HPCAL4|ENSG00000116983|protein_coding	-3.21349	-0.438721	2.72101e-42	7.1712e-40	Down-regulated gene
CSTB|ENSG00000160213|protein_coding	-2.79452	8.60453	2.77689e-42	7.21683e-40	Down-regulated gene
PRH2|ENSG00000134551|protein_coding	-3.98321	-1.1297	3.103e-42	7.95387e-40	Down-regulated gene
AQP11|ENSG00000178301|protein_coding	-2.02495	2.3086	3.21537e-42	8.13053e-40	Down-regulated gene
ABCG2|ENSG00000118777|protein_coding	-2.83729	3.36387	4.48145e-42	1.11809e-39	Down-regulated gene
RNF222|ENSG00000189051|protein_coding	-4.34034	-0.0199797	7.5656e-42	1.86273e-39	Down-regulated gene
GSN|ENSG00000148180|protein_coding	-1.89723	9.01712	2.39724e-41	5.8256e-39	Down-regulated gene
PTGR1|ENSG00000106853|protein_coding	-1.95216	5.39282	3.26744e-41	7.83849e-39	Down-regulated gene
CIDEC|ENSG00000187288|protein_coding	-3.71492	3.16629	5.07334e-41	1.20168e-38	Down-regulated gene
MAL|ENSG00000172005|protein_coding	-4.91422	6.32109	1.44813e-40	3.38718e-38	Down-regulated gene
LEXM|ENSG00000162398|protein_coding	-3.27301	-0.382337	2.54818e-40	5.88661e-38	Down-regulated gene
ALDOB|ENSG00000136872|protein_coding	-4.3889	7.71317	5.77051e-40	1.3168e-37	Down-regulated gene
SLC25A4|ENSG00000151729|protein_coding	-1.93827	5.15645	6.46171e-40	1.45677e-37	Down-regulated gene
KCNE2|ENSG00000159197|protein_coding	-4.26172	2.98666	9.60095e-40	2.13873e-37	Down-regulated gene
C16orf89|ENSG00000153446|protein_coding	-3.49043	3.12466	1.11265e-39	2.44941e-37	Down-regulated gene
GUCA2B|ENSG00000044012|protein_coding	-4.47709	0.547644	1.30137e-39	2.83153e-37	Down-regulated gene
IGFBP6|ENSG00000167779|protein_coding	-2.3996	4.549	2.27236e-39	4.8874e-37	Down-regulated gene
GPX3|ENSG00000211445|protein_coding	-2.46604	6.48966	4.08286e-39	8.68164e-37	Down-regulated gene
SCARA5|ENSG00000168079|protein_coding	-3.34291	3.44073	5.36339e-39	1.12764e-36	Down-regulated gene
TFAP2B|ENSG00000008196|protein_coding	-4.74064	-0.816206	9.69054e-39	2.01477e-36	Down-regulated gene
PLCD4|ENSG00000115556|protein_coding	-1.97891	2.55423	1.03046e-38	2.11889e-36	Down-regulated gene
SH3BGR|ENSG00000185437|protein_coding	-2.42945	1.82052	2.28113e-38	4.58974e-36	Down-regulated gene
FABP2|ENSG00000145384|protein_coding	-4.64356	4.27623	2.52881e-38	5.03395e-36	Down-regulated gene
RXRG|ENSG00000143171|protein_coding	-3.22117	-0.732176	2.75188e-38	5.42034e-36	Down-regulated gene
SLC46A1|ENSG00000076351|protein_coding	-2.13521	3.45394	2.95434e-38	5.75851e-36	Down-regulated gene
GSTM5|ENSG00000134201|protein_coding	-2.67221	2.22057	3.05304e-38	5.88953e-36	Down-regulated gene
ERICH4|ENSG00000204978|protein_coding	-3.89377	0.185046	1.00014e-37	1.90966e-35	Down-regulated gene
ANKRD35|ENSG00000198483|protein_coding	-2.60905	2.04549	1.56432e-37	2.92716e-35	Down-regulated gene
AQP4|ENSG00000171885|protein_coding	-4.68898	0.702903	1.62881e-37	3.01765e-35	Down-regulated gene
FXYD6|ENSG00000137726|protein_coding	-2.57416	4.69278	8.28836e-37	1.52051e-34	Down-regulated gene
PTGDR2|ENSG00000183134|protein_coding	-2.49021	1.47661	1.07019e-36	1.94422e-34	Down-regulated gene
KCNA5|ENSG00000130037|protein_coding	-3.08625	1.19953	1.22992e-36	2.2129e-34	Down-regulated gene
FAM180B|ENSG00000196666|protein_coding	-3.50843	-1.95111	1.5567e-36	2.77418e-34	Down-regulated gene
KAT2B|ENSG00000114166|protein_coding	-1.57678	4.8637	1.61158e-36	2.84489e-34	Down-regulated gene
CYP2D6|ENSG00000100197|protein_coding	-2.58906	1.77902	2.15696e-36	3.77207e-34	Down-regulated gene
HLF|ENSG00000108924|protein_coding	-2.94589	3.45846	4.86341e-36	8.4263e-34	Down-regulated gene
ACY3|ENSG00000132744|protein_coding	-2.69306	4.53637	5.5961e-36	9.6068e-34	Down-regulated gene
C3orf85|ENSG00000241224|protein_coding	-4.35136	1.33212	6.74474e-36	1.14734e-33	Down-regulated gene
ACE2|ENSG00000130234|protein_coding	-3.52823	4.90447	7.59685e-36	1.28065e-33	Down-regulated gene
MYL6|ENSG00000092841|protein_coding	-1.37688	9.27528	7.94187e-36	1.32686e-33	Down-regulated gene
KRTAP3-2|ENSG00000212900|protein_coding	-6.47965	-0.965692	8.05817e-36	1.33438e-33	Down-regulated gene
APOB|ENSG00000084674|protein_coding	-4.83523	7.11113	1.10879e-35	1.81997e-33	Down-regulated gene
USP2|ENSG00000036672|protein_coding	-2.42904	2.50824	1.23032e-35	2.00189e-33	Down-regulated gene
CKMT2|ENSG00000131730|protein_coding	-2.69097	1.42098	1.44821e-35	2.33611e-33	Down-regulated gene
C11orf86|ENSG00000173237|protein_coding	-4.04789	3.16408	1.50358e-35	2.4047e-33	Down-regulated gene
PYGM|ENSG00000068976|protein_coding	-3.03664	2.56615	1.66033e-35	2.63289e-33	Down-regulated gene
ALPI|ENSG00000163295|protein_coding	-4.37024	4.3741	1.79294e-35	2.81928e-33	Down-regulated gene
DAB1|ENSG00000173406|protein_coding	-3.11842	1.58877	2.1804e-35	3.39998e-33	Down-regulated gene
CAB39L|ENSG00000102547|protein_coding	-2.06379	4.25986	2.74217e-35	4.24061e-33	Down-regulated gene
RNASE7|ENSG00000165799|protein_coding	-4.98768	1.56224	5.39485e-35	8.27447e-33	Down-regulated gene
UGT1A7|ENSG00000244122|protein_coding	-4.13902	0.129516	6.01621e-35	9.15247e-33	Down-regulated gene
UGT1A4|ENSG00000244474|protein_coding	-3.95403	-2.85294	7.85017e-35	1.18462e-32	Down-regulated gene
TMEM253|ENSG00000232070|protein_coding	-2.9064	0.676215	9.68423e-35	1.44969e-32	Down-regulated gene
SLC35G1|ENSG00000176273|protein_coding	-1.94395	3.7326	1.13112e-34	1.6798e-32	Down-regulated gene
PRSS27|ENSG00000172382|protein_coding	-3.80401	3.52632	1.27274e-34	1.87524e-32	Down-regulated gene
CYP4F2|ENSG00000186115|protein_coding	-3.90049	2.93886	1.42485e-34	2.08296e-32	Down-regulated gene
OTOP2|ENSG00000183034|protein_coding	-3.89709	-1.5965	1.49254e-34	2.16499e-32	Down-regulated gene
CREB3L3|ENSG00000060566|protein_coding	-3.84034	4.59406	1.78603e-34	2.57078e-32	Down-regulated gene
ABHD6|ENSG00000163686|protein_coding	-1.39275	3.85406	2.22918e-34	3.18416e-32	Down-regulated gene
GNG7|ENSG00000176533|protein_coding	-2.27848	3.29703	2.94338e-34	4.17246e-32	Down-regulated gene
WISP2|ENSG00000064205|protein_coding	-3.09248	1.60628	3.74336e-34	5.26659e-32	Down-regulated gene
TM6SF2|ENSG00000213996|protein_coding	-3.31287	3.0164	3.89172e-34	5.43447e-32	Down-regulated gene
HSPA2|ENSG00000126803|protein_coding	-2.33327	4.47526	3.99726e-34	5.5405e-32	Down-regulated gene
ANXA1|ENSG00000135046|protein_coding	-2.92209	8.48526	5.4323e-34	7.4742e-32	Down-regulated gene
VIT|ENSG00000205221|protein_coding	-2.90372	0.686886	5.61083e-34	7.66349e-32	Down-regulated gene
TMEM79|ENSG00000163472|protein_coding	-2.19107	3.5248	6.77194e-34	9.18236e-32	Down-regulated gene
LGI4|ENSG00000153902|protein_coding	-2.25567	2.22676	7.28389e-34	9.80548e-32	Down-regulated gene
SPINK2|ENSG00000128040|protein_coding	-3.31688	-1.51634	9.87084e-34	1.30995e-31	Down-regulated gene
MYOT|ENSG00000120729|protein_coding	-2.60185	0.0634501	1.05696e-33	1.39281e-31	Down-regulated gene
ASB11|ENSG00000165192|protein_coding	-3.73096	-1.27753	1.06725e-33	1.39653e-31	Down-regulated gene
HPSE2|ENSG00000172987|protein_coding	-3.48586	1.23066	1.17157e-33	1.52239e-31	Down-regulated gene
APOC3|ENSG00000110245|protein_coding	-5.4433	4.50175	1.18999e-33	1.53567e-31	Down-regulated gene
MTUS2|ENSG00000132938|protein_coding	-3.11018	0.639256	1.48804e-33	1.90714e-31	Down-regulated gene
S100B|ENSG00000160307|protein_coding	-2.38806	2.09171	1.8633e-33	2.35582e-31	Down-regulated gene
FXYD1|ENSG00000266964|protein_coding	-2.67393	0.3408	2.25376e-33	2.83036e-31	Down-regulated gene
SIGLEC11|ENSG00000161640|protein_coding	-2.64136	0.0431569	2.8846e-33	3.59844e-31	Down-regulated gene
ARC|ENSG00000198576|protein_coding	-3.48785	2.11081	3.16726e-33	3.92489e-31	Down-regulated gene
MYZAP|ENSG00000263155|protein_coding	-2.05931	1.816	3.50945e-33	4.32031e-31	Down-regulated gene
GFRA2|ENSG00000168546|protein_coding	-2.5428	0.720081	6.9567e-33	8.50809e-31	Down-regulated gene
CYSRT1|ENSG00000197191|protein_coding	-3.49258	3.19409	8.81242e-33	1.07077e-30	Down-regulated gene
DHDH|ENSG00000104808|protein_coding	-2.53139	1.09538	1.29174e-32	1.55942e-30	Down-regulated gene
SULT1A1|ENSG00000196502|protein_coding	-2.00675	4.26035	1.3864e-32	1.66297e-30	Down-regulated gene
SLC51B|ENSG00000186198|protein_coding	-2.90649	1.45916	1.64465e-32	1.96017e-30	Down-regulated gene
KRT3|ENSG00000186442|protein_coding	-3.8766	-2.15107	1.98661e-32	2.35275e-30	Down-regulated gene
FGL2|ENSG00000127951|protein_coding	-2.46809	6.30149	2.27233e-32	2.6742e-30	Down-regulated gene
CEACAM20|ENSG00000273777|protein_coding	-4.09017	0.97418	2.79072e-32	3.26375e-30	Down-regulated gene
PLP1|ENSG00000123560|protein_coding	-3.6377	2.25135	2.98574e-32	3.47014e-30	Down-regulated gene
GCNT4|ENSG00000176928|protein_coding	-2.57975	3.48592	4.42469e-32	5.07943e-30	Down-regulated gene
PINK1|ENSG00000158828|protein_coding	-1.34767	4.91949	5.09679e-32	5.81531e-30	Down-regulated gene
ANKRD31|ENSG00000145700|protein_coding	-2.36362	-0.735789	6.9998e-32	7.9382e-30	Down-regulated gene
PEBP4|ENSG00000134020|protein_coding	-3.19143	-0.97677	8.51114e-32	9.594e-30	Down-regulated gene
NAT8|ENSG00000144035|protein_coding	-3.81525	-0.150775	8.61855e-32	9.65691e-30	Down-regulated gene
C4orf3|ENSG00000164096|protein_coding	-1.19698	6.35734	9.01525e-32	1.00413e-29	Down-regulated gene
LEAP2|ENSG00000164406|protein_coding	-2.16842	1.08899	9.55615e-32	1.05807e-29	Down-regulated gene
RNASE1|ENSG00000129538|protein_coding	-2.24514	7.98184	1.12009e-31	1.23288e-29	Down-regulated gene
TGM3|ENSG00000125780|protein_coding	-4.93414	6.53704	1.25255e-31	1.37062e-29	Down-regulated gene
ESRRG|ENSG00000196482|protein_coding	-3.29849	2.62401	1.43918e-31	1.56569e-29	Down-regulated gene
MALL|ENSG00000144063|protein_coding	-2.4874	4.01307	1.53803e-31	1.66356e-29	Down-regulated gene
DENND2C|ENSG00000175984|protein_coding	-2.58282	2.64576	1.69376e-31	1.82147e-29	Down-regulated gene
SLC23A1|ENSG00000170482|protein_coding	-2.66397	1.41323	1.94042e-31	2.06118e-29	Down-regulated gene
TSPYL2|ENSG00000184205|protein_coding	-1.67894	4.30237	1.9497e-31	2.06118e-29	Down-regulated gene
TCEAL6|ENSG00000204071|protein_coding	-3.4191	-2.33197	2.1119e-31	2.2201e-29	Down-regulated gene
TMEM100|ENSG00000166292|protein_coding	-2.9931	2.3545	2.41984e-31	2.52961e-29	Down-regulated gene
MAF|ENSG00000178573|protein_coding	-1.6656	5.80765	2.47653e-31	2.57449e-29	Down-regulated gene
KLF10|ENSG00000155090|protein_coding	-1.3417	6.71763	3.16816e-31	3.27529e-29	Down-regulated gene
PEPD|ENSG00000124299|protein_coding	-1.37468	6.34511	3.67302e-31	3.77635e-29	Down-regulated gene
COX7A1|ENSG00000161281|protein_coding	-1.97128	2.9013	3.841e-31	3.92748e-29	Down-regulated gene
TEF|ENSG00000167074|protein_coding	-1.54384	4.27315	4.62697e-31	4.70542e-29	Down-regulated gene
CA1|ENSG00000133742|protein_coding	-3.94233	2.96935	4.91973e-31	4.95243e-29	Down-regulated gene
PI16|ENSG00000164530|protein_coding	-3.44774	3.53681	4.92279e-31	4.95243e-29	Down-regulated gene
PSD|ENSG00000059915|protein_coding	-2.9567	4.41492	5.65199e-31	5.65562e-29	Down-regulated gene
SASH1|ENSG00000111961|protein_coding	-1.58375	5.4365	5.92024e-31	5.89253e-29	Down-regulated gene
UGT1A5|ENSG00000240224|protein_coding	-4.01163	-2.93523	6.03133e-31	5.97134e-29	Down-regulated gene
LAMB4|ENSG00000091128|protein_coding	-2.7062	-0.79744	7.05127e-31	6.94439e-29	Down-regulated gene
LRRC3B|ENSG00000179796|protein_coding	-2.95136	-2.49591	7.80231e-31	7.604e-29	Down-regulated gene
XPNPEP2|ENSG00000122121|protein_coding	-3.46653	4.53796	7.91481e-31	7.67367e-29	Down-regulated gene
SULT1A2|ENSG00000197165|protein_coding	-2.79851	1.90319	8.91338e-31	8.55319e-29	Down-regulated gene
ITLN2|ENSG00000158764|protein_coding	-4.11351	0.712973	1.00035e-30	9.50181e-29	Down-regulated gene
MAMDC2|ENSG00000165072|protein_coding	-3.12118	3.33079	1.36571e-30	1.29067e-28	Down-regulated gene
CBX7|ENSG00000100307|protein_coding	-1.76912	5.01416	1.51451e-30	1.4241e-28	Down-regulated gene
TXNDC5|ENSG00000239264|protein_coding	-1.68313	4.55336	1.74615e-30	1.6337e-28	Down-regulated gene
PIM1|ENSG00000137193|protein_coding	-1.56621	5.85508	1.84531e-30	1.71789e-28	Down-regulated gene
AIF1L|ENSG00000126878|protein_coding	-2.4546	4.06964	1.93803e-30	1.79527e-28	Down-regulated gene
ARHGAP10|ENSG00000071205|protein_coding	-1.78429	4.40812	1.9696e-30	1.81552e-28	Down-regulated gene
COL4A6|ENSG00000197565|protein_coding	-3.10059	3.62318	2.05347e-30	1.88355e-28	Down-regulated gene
SCNN1B|ENSG00000168447|protein_coding	-3.64203	3.34728	2.16392e-30	1.97519e-28	Down-regulated gene
C2orf40|ENSG00000119147|protein_coding	-3.73082	4.24594	2.26785e-30	2.06e-28	Down-regulated gene
PPP1R3C|ENSG00000119938|protein_coding	-2.78579	3.49791	2.90752e-30	2.62829e-28	Down-regulated gene
FAM25A|ENSG00000188100|protein_coding	-5.84856	1.22451	3.10767e-30	2.79571e-28	Down-regulated gene
NR4A3|ENSG00000119508|protein_coding	-2.43468	4.53428	3.1955e-30	2.86097e-28	Down-regulated gene
VSTM2A|ENSG00000170419|protein_coding	-3.6403	-0.570233	3.32401e-30	2.96185e-28	Down-regulated gene
LY6G6C|ENSG00000204421|protein_coding	-3.6104	1.7371	3.64577e-30	3.23316e-28	Down-regulated gene
ADCYAP1R1|ENSG00000078549|protein_coding	-3.1627	0.690195	4.04417e-30	3.56956e-28	Down-regulated gene
PMM1|ENSG00000100417|protein_coding	-1.35649	4.18931	4.08073e-30	3.58491e-28	Down-regulated gene
PLAC9|ENSG00000189129|protein_coding	-2.03843	2.41192	4.30722e-30	3.7662e-28	Down-regulated gene
RAP1A|ENSG00000116473|protein_coding	-1.1426	6.42062	4.40686e-30	3.8354e-28	Down-regulated gene
CKB|ENSG00000166165|protein_coding	-2.54114	7.21056	5.90423e-30	5.11481e-28	Down-regulated gene
IL1RN|ENSG00000136689|protein_coding	-2.84731	7.06467	7.09447e-30	6.08952e-28	Down-regulated gene
TPM1|ENSG00000140416|protein_coding	-2.09679	8.66197	8.87659e-30	7.58442e-28	Down-regulated gene
HEBP1|ENSG00000013583|protein_coding	-1.37599	5.05213	1.05434e-29	8.96761e-28	Down-regulated gene
ADHFE1|ENSG00000147576|protein_coding	-2.33461	1.27242	1.14007e-29	9.65293e-28	Down-regulated gene
NCAM1|ENSG00000149294|protein_coding	-2.84206	4.01722	1.25905e-29	1.05357e-27	Down-regulated gene
FOSB|ENSG00000125740|protein_coding	-2.80506	6.78721	1.26122e-29	1.05357e-27	Down-regulated gene
IL20RB|ENSG00000174564|protein_coding	-2.98348	2.31198	1.46088e-29	1.20956e-27	Down-regulated gene
RHOB|ENSG00000143878|protein_coding	-1.84653	8.57143	1.84356e-29	1.51878e-27	Down-regulated gene
INPP5A|ENSG00000068383|protein_coding	-1.23298	5.07141	1.85058e-29	1.51878e-27	Down-regulated gene
NPAS4|ENSG00000174576|protein_coding	-2.92887	-1.08232	2.27059e-29	1.85534e-27	Down-regulated gene
PDK4|ENSG00000004799|protein_coding	-2.72631	6.89476	2.36622e-29	1.92507e-27	Down-regulated gene
TKFC|ENSG00000149476|protein_coding	-1.43669	5.63642	2.38686e-29	1.93346e-27	Down-regulated gene
PTN|ENSG00000105894|protein_coding	-2.28755	3.47101	2.54603e-29	2.0535e-27	Down-regulated gene
SAT2|ENSG00000141504|protein_coding	-1.23677	4.58987	2.92568e-29	2.34958e-27	Down-regulated gene
GLRA4|ENSG00000188828|protein_coding	-3.55411	-1.59174	3.04834e-29	2.43763e-27	Down-regulated gene
PER1|ENSG00000179094|protein_coding	-1.82512	6.17362	3.16655e-29	2.52138e-27	Down-regulated gene
DHRS11|ENSG00000278535|protein_coding	-2.01594	5.23105	3.42292e-29	2.71397e-27	Down-regulated gene
AMPD1|ENSG00000116748|protein_coding	-2.94285	0.321593	4.1783e-29	3.29892e-27	Down-regulated gene
BCO1|ENSG00000135697|protein_coding	-2.54006	2.82338	5.01189e-29	3.93879e-27	Down-regulated gene
ZFP36|ENSG00000128016|protein_coding	-1.73735	8.64825	5.03084e-29	3.93879e-27	Down-regulated gene
PAX9|ENSG00000198807|protein_coding	-3.31259	3.48699	5.55316e-29	4.32961e-27	Down-regulated gene
HPGD|ENSG00000164120|protein_coding	-2.52099	6.38789	6.64347e-29	5.1582e-27	Down-regulated gene
CYP4F22|ENSG00000171954|protein_coding	-3.35464	1.25405	6.8854e-29	5.32395e-27	Down-regulated gene
FOXI2|ENSG00000186766|protein_coding	-2.97978	-1.69011	7.69714e-29	5.92712e-27	Down-regulated gene
TBX10|ENSG00000167800|protein_coding	-3.36228	1.18308	1.03317e-28	7.92322e-27	Down-regulated gene
FAM107A|ENSG00000168309|protein_coding	-2.32043	3.42718	1.24517e-28	9.51003e-27	Down-regulated gene
ATP4B|ENSG00000186009|protein_coding	-5.09438	5.94579	1.32391e-28	1.00703e-26	Down-regulated gene
ETFDH|ENSG00000171503|protein_coding	-1.27034	4.61177	1.41989e-28	1.07133e-26	Down-regulated gene
GIF|ENSG00000134812|protein_coding	-4.74649	6.47563	1.46065e-28	1.09766e-26	Down-regulated gene
TP53AIP1|ENSG00000120471|protein_coding	-3.35065	-0.843356	1.63964e-28	1.2175e-26	Down-regulated gene
LRRC3|ENSG00000160233|protein_coding	-1.8161	3.63411	1.95377e-28	1.44501e-26	Down-regulated gene
RDH12|ENSG00000139988|protein_coding	-2.97954	1.63559	2.10087e-28	1.54769e-26	Down-regulated gene
DPP6|ENSG00000130226|protein_coding	-3.5452	2.07413	2.11608e-28	1.55279e-26	Down-regulated gene
PTGS1|ENSG00000095303|protein_coding	-1.84302	5.12125	2.16528e-28	1.58268e-26	Down-regulated gene
KRT78|ENSG00000170423|protein_coding	-5.36344	4.96454	2.71493e-28	1.96906e-26	Down-regulated gene
GDPD2|ENSG00000130055|protein_coding	-2.79544	1.95436	2.75959e-28	1.99372e-26	Down-regulated gene
NCCRP1|ENSG00000188505|protein_coding	-4.04688	4.73673	3.10111e-28	2.23184e-26	Down-regulated gene
GSTM2|ENSG00000213366|protein_coding	-1.80497	3.1859	3.12583e-28	2.24102e-26	Down-regulated gene
PDZRN4|ENSG00000165966|protein_coding	-3.36066	2.635	3.78307e-28	2.70186e-26	Down-regulated gene
SMDT1|ENSG00000183172|protein_coding	-1.08883	5.18949	4.33513e-28	3.07269e-26	Down-regulated gene
RGS2|ENSG00000116741|protein_coding	-1.92588	5.72857	5.04096e-28	3.55949e-26	Down-regulated gene
DERL3|ENSG00000099958|protein_coding	-2.41003	5.00706	5.14188e-28	3.6171e-26	Down-regulated gene
TMEM154|ENSG00000170006|protein_coding	-2.16821	4.34136	6.56848e-28	4.60335e-26	Down-regulated gene
ADAMTS1|ENSG00000154734|protein_coding	-1.97838	6.01659	7.35615e-28	5.13613e-26	Down-regulated gene
GPM6A|ENSG00000150625|protein_coding	-2.85447	0.918712	7.43324e-28	5.17066e-26	Down-regulated gene
EFS|ENSG00000100842|protein_coding	-2.0924	3.02327	8.64258e-28	5.98963e-26	Down-regulated gene
ABCG5|ENSG00000138075|protein_coding	-2.82206	1.49925	9.34569e-28	6.42929e-26	Down-regulated gene
FAM19A4|ENSG00000163377|protein_coding	-4.16156	1.10722	9.67075e-28	6.60435e-26	Down-regulated gene
TNFRSF17|ENSG00000048462|protein_coding	-2.73656	1.71317	9.84119e-28	6.69631e-26	Down-regulated gene
EHD3|ENSG00000013016|protein_coding	-1.96905	4.22874	1.01218e-27	6.86226e-26	Down-regulated gene
ASPA|ENSG00000108381|protein_coding	-2.31793	1.35882	1.01739e-27	6.87271e-26	Down-regulated gene
TMEM35A|ENSG00000126950|protein_coding	-3.07787	1.73026	1.03166e-27	6.94405e-26	Down-regulated gene
KLF9|ENSG00000119138|protein_coding	-1.78561	6.24689	1.06267e-27	7.12712e-26	Down-regulated gene
LRRC4|ENSG00000128594|protein_coding	-1.97654	1.74781	1.09481e-27	7.31645e-26	Down-regulated gene
FAT3|ENSG00000165323|protein_coding	-3.09074	2.37897	1.10093e-27	7.33117e-26	Down-regulated gene
KLF8|ENSG00000102349|protein_coding	-2.09036	2.5194	1.10975e-27	7.36372e-26	Down-regulated gene
LGALS9C|ENSG00000171916|protein_coding	-2.95598	2.83448	1.15659e-27	7.62046e-26	Down-regulated gene
CRYAB|ENSG00000109846|protein_coding	-2.53972	5.07835	1.17828e-27	7.70906e-26	Down-regulated gene
CCDC69|ENSG00000198624|protein_coding	-2.08673	5.8129	1.46151e-27	9.52884e-26	Down-regulated gene
SLC7A3|ENSG00000165349|protein_coding	-3.22499	-1.32886	1.7847e-27	1.15956e-25	Down-regulated gene
DGKB|ENSG00000136267|protein_coding	-2.96416	0.484532	2.21306e-27	1.42796e-25	Down-regulated gene
PNLIPRP3|ENSG00000203837|protein_coding	-4.77858	-1.65769	2.42281e-27	1.55792e-25	Down-regulated gene
FLRT1|ENSG00000126500|protein_coding	-2.38558	0.510717	2.43907e-27	1.56301e-25	Down-regulated gene
ELOVL4|ENSG00000118402|protein_coding	-2.37444	1.21348	3.11384e-27	1.98184e-25	Down-regulated gene
DUSP5|ENSG00000138166|protein_coding	-1.95271	4.92108	3.2411e-27	2.05585e-25	Down-regulated gene
CPO|ENSG00000144410|protein_coding	-2.67632	-1.83909	3.61874e-27	2.28763e-25	Down-regulated gene
EPM2A|ENSG00000112425|protein_coding	-1.72508	2.69751	3.79724e-27	2.38592e-25	Down-regulated gene
P2RY14|ENSG00000174944|protein_coding	-2.19085	2.81567	3.79972e-27	2.38592e-25	Down-regulated gene
PITX1|ENSG00000069011|protein_coding	-2.05339	6.65009	4.13898e-27	2.59025e-25	Down-regulated gene
UPK1A|ENSG00000105668|protein_coding	-3.78336	1.08954	4.69119e-27	2.92605e-25	Down-regulated gene
MAB21L3|ENSG00000173212|protein_coding	-3.55683	0.654377	5.01219e-27	3.10557e-25	Down-regulated gene
GFRA4|ENSG00000125861|protein_coding	-3.90859	-3.10365	5.12377e-27	3.16422e-25	Down-regulated gene
ELL2|ENSG00000118985|protein_coding	-1.46337	5.70256	6.02509e-27	3.69644e-25	Down-regulated gene
PMP2|ENSG00000147588|protein_coding	-3.26656	-0.908753	6.16682e-27	3.77103e-25	Down-regulated gene
ADAMTSL1|ENSG00000178031|protein_coding	-1.95961	3.1124	6.40127e-27	3.90164e-25	Down-regulated gene
TOM1L2|ENSG00000175662|protein_coding	-1.31259	6.00662	7.58741e-27	4.59468e-25	Down-regulated gene
OSGIN1|ENSG00000140961|protein_coding	-1.81136	3.12204	8.4438e-27	5.08888e-25	Down-regulated gene
PRKN|ENSG00000185345|protein_coding	-1.94684	1.63257	8.46757e-27	5.08888e-25	Down-regulated gene
NT5C1A|ENSG00000116981|protein_coding	-2.86615	-2.88638	8.4851e-27	5.08888e-25	Down-regulated gene
NEFM|ENSG00000104722|protein_coding	-2.78859	-0.438481	9.09967e-27	5.44003e-25	Down-regulated gene
HSPB8|ENSG00000152137|protein_coding	-2.75033	5.72239	9.54312e-27	5.68697e-25	Down-regulated gene
GSTA3|ENSG00000174156|protein_coding	-3.79635	-2.69054	1.0068e-26	5.98073e-25	Down-regulated gene
CASTOR1|ENSG00000239282|protein_coding	-1.70035	0.325294	1.10319e-26	6.53257e-25	Down-regulated gene
PCOLCE2|ENSG00000163710|protein_coding	-2.71662	1.47216	1.10737e-26	6.53662e-25	Down-regulated gene
GBP6|ENSG00000183347|protein_coding	-4.38444	4.96326	1.15786e-26	6.81315e-25	Down-regulated gene
GPAT3|ENSG00000138678|protein_coding	-2.00709	3.3866	1.47117e-26	8.60265e-25	Down-regulated gene
CADM3|ENSG00000162706|protein_coding	-3.02909	2.33106	1.62187e-26	9.45432e-25	Down-regulated gene
DEFA5|ENSG00000164816|protein_coding	-5.68243	5.06311	1.99463e-26	1.15912e-24	Down-regulated gene
SOX15|ENSG00000129194|protein_coding	-2.69303	2.31233	2.10853e-26	1.22151e-24	Down-regulated gene
TMPRSS15|ENSG00000154646|protein_coding	-4.73607	4.21232	2.15462e-26	1.24436e-24	Down-regulated gene
KDM8|ENSG00000155666|protein_coding	-1.07786	2.05878	2.28256e-26	1.31419e-24	Down-regulated gene
TSLP|ENSG00000145777|protein_coding	-2.25663	0.153806	2.32451e-26	1.33424e-24	Down-regulated gene
SCEL|ENSG00000136155|protein_coding	-4.13921	5.22888	2.70768e-26	1.5447e-24	Down-regulated gene
IGSF11|ENSG00000144847|protein_coding	-2.68453	0.427339	2.81368e-26	1.60029e-24	Down-regulated gene
KRT15|ENSG00000171346|protein_coding	-3.50462	5.65818	2.85777e-26	1.62044e-24	Down-regulated gene
ROGDI|ENSG00000067836|protein_coding	-1.12709	4.49052	2.95219e-26	1.66893e-24	Down-regulated gene
ABI3BP|ENSG00000154175|protein_coding	-2.58171	5.90921	3.38009e-26	1.90507e-24	Down-regulated gene
RBKS|ENSG00000171174|protein_coding	-1.34817	2.49233	3.88969e-26	2.1857e-24	Down-regulated gene
FBP2|ENSG00000130957|protein_coding	-2.90032	1.31525	4.09355e-26	2.29337e-24	Down-regulated gene
SPINK7|ENSG00000145879|protein_coding	-4.83977	3.16913	5.86342e-26	3.26537e-24	Down-regulated gene
TPRG1|ENSG00000188001|protein_coding	-2.40283	2.43994	6.04616e-26	3.35714e-24	Down-regulated gene
KLK13|ENSG00000167759|protein_coding	-4.1658	4.87607	7.26569e-26	4.02235e-24	Down-regulated gene
C3orf18|ENSG00000088543|protein_coding	-1.68947	1.94666	8.9965e-26	4.95125e-24	Down-regulated gene
C11orf96|ENSG00000187479|protein_coding	-2.02227	6.34135	1.04682e-25	5.72752e-24	Down-regulated gene
MYL9|ENSG00000101335|protein_coding	-2.64261	9.6308	1.07503e-25	5.8647e-24	Down-regulated gene
PRIMA1|ENSG00000175785|protein_coding	-3.12029	3.80383	1.1892e-25	6.46867e-24	Down-regulated gene
ZNF185|ENSG00000147394|protein_coding	-2.49155	5.91778	1.31548e-25	7.13483e-24	Down-regulated gene
CNFN|ENSG00000105427|protein_coding	-3.86507	6.03834	1.36059e-25	7.35822e-24	Down-regulated gene
NPPC|ENSG00000163273|protein_coding	-3.08711	-0.537999	1.45031e-25	7.82082e-24	Down-regulated gene
DSTN|ENSG00000125868|protein_coding	-1.40041	8.87855	1.51958e-25	8.17079e-24	Down-regulated gene
RCAN2|ENSG00000172348|protein_coding	-2.12638	5.0057	1.67474e-25	8.95972e-24	Down-regulated gene
GRHL3|ENSG00000158055|protein_coding	-2.93014	3.35392	1.67588e-25	8.95972e-24	Down-regulated gene
CAMK2A|ENSG00000070808|protein_coding	-2.43103	0.148867	1.7043e-25	9.08573e-24	Down-regulated gene
CAPN14|ENSG00000214711|protein_coding	-4.18347	3.80856	1.71228e-25	9.10234e-24	Down-regulated gene
ALDH3A1|ENSG00000108602|protein_coding	-2.87067	6.20738	1.7876e-25	9.47578e-24	Down-regulated gene
FHL1|ENSG00000022267|protein_coding	-2.71046	7.46479	1.83432e-25	9.696e-24	Down-regulated gene
ZBTB16|ENSG00000109906|protein_coding	-2.79004	2.92789	2.58355e-25	1.35796e-23	Down-regulated gene
NAP1L5|ENSG00000177432|protein_coding	-1.63049	2.13779	3.48201e-25	1.81998e-23	Down-regulated gene
KLHL41|ENSG00000239474|protein_coding	-2.41699	-0.441511	4.03276e-25	2.09614e-23	Down-regulated gene
ANKRD63|ENSG00000230778|protein_coding	-3.26842	-2.69284	4.90698e-25	2.54347e-23	Down-regulated gene
SMTN|ENSG00000183963|protein_coding	-2.1431	7.79256	4.9706e-25	2.56933e-23	Down-regulated gene
C17orf78|ENSG00000278505|protein_coding	-3.53297	2.28584	5.1621e-25	2.66097e-23	Down-regulated gene
DHRS7|ENSG00000100612|protein_coding	-1.2391	5.58471	5.22346e-25	2.6852e-23	Down-regulated gene
ALDH6A1|ENSG00000119711|protein_coding	-1.1709	5.22068	5.24798e-25	2.69042e-23	Down-regulated gene
A2ML1|ENSG00000166535|protein_coding	-4.58596	6.68353	5.36662e-25	2.74372e-23	Down-regulated gene
ATP4A|ENSG00000105675|protein_coding	-4.76053	6.39617	6.76402e-25	3.44873e-23	Down-regulated gene
IGLL5|ENSG00000254709|protein_coding	-2.78165	7.08104	7.30098e-25	3.71239e-23	Down-regulated gene
GRIA4|ENSG00000152578|protein_coding	-2.52935	-0.598454	8.00203e-25	4.05783e-23	Down-regulated gene
ADRB2|ENSG00000169252|protein_coding	-2.161	1.48747	8.22873e-25	4.16151e-23	Down-regulated gene
BTC|ENSG00000174808|protein_coding	-1.78344	3.1553	8.41222e-25	4.24284e-23	Down-regulated gene
NDRG4|ENSG00000103034|protein_coding	-2.01178	2.74682	8.57507e-25	4.31335e-23	Down-regulated gene
CD36|ENSG00000135218|protein_coding	-2.1102	4.46279	9.19253e-25	4.61154e-23	Down-regulated gene
SLC15A1|ENSG00000088386|protein_coding	-3.36188	3.87401	1.18666e-24	5.90551e-23	Down-regulated gene
CIDEA|ENSG00000176194|protein_coding	-3.83823	-0.676183	1.31593e-24	6.51422e-23	Down-regulated gene
AKR1B15|ENSG00000227471|protein_coding	-3.29697	1.03863	1.32702e-24	6.55175e-23	Down-regulated gene
ATP5J|ENSG00000154723|protein_coding	-1.08684	6.71661	1.47455e-24	7.26099e-23	Down-regulated gene
DUSP1|ENSG00000120129|protein_coding	-1.7986	7.95669	1.82565e-24	8.85014e-23	Down-regulated gene
LMO3|ENSG00000048540|protein_coding	-2.43101	2.80441	1.87284e-24	9.05544e-23	Down-regulated gene
MT1X|ENSG00000187193|protein_coding	-1.87894	4.72213	1.8919e-24	9.12404e-23	Down-regulated gene
MICALL1|ENSG00000100139|protein_coding	-1.25994	5.9949	2.07181e-24	9.96601e-23	Down-regulated gene
CRY2|ENSG00000121671|protein_coding	-1.08399	5.00225	2.38607e-24	1.14483e-22	Down-regulated gene
GKN2|ENSG00000183607|protein_coding	-4.64779	7.87016	2.63308e-24	1.25369e-22	Down-regulated gene
TMEM236|ENSG00000148483|protein_coding	-2.92497	2.05933	2.72171e-24	1.29261e-22	Down-regulated gene
DHRS1|ENSG00000157379|protein_coding	-1.21584	4.31303	3.02248e-24	1.4282e-22	Down-regulated gene
SCUBE1|ENSG00000159307|protein_coding	-2.24585	3.36748	3.05019e-24	1.43766e-22	Down-regulated gene
CRYL1|ENSG00000165475|protein_coding	-1.5074	5.32092	3.35176e-24	1.57188e-22	Down-regulated gene
AHNAK|ENSG00000124942|protein_coding	-1.48351	9.8276	3.51281e-24	1.64329e-22	Down-regulated gene
JUN|ENSG00000177606|protein_coding	-1.40727	7.99702	3.85498e-24	1.79886e-22	Down-regulated gene
SGCA|ENSG00000108823|protein_coding	-2.63929	2.91811	4.29741e-24	2.00033e-22	Down-regulated gene
MXI1|ENSG00000119950|protein_coding	-1.20619	5.23719	4.37975e-24	2.0336e-22	Down-regulated gene
TMEM120A|ENSG00000189077|protein_coding	-1.13788	5.05428	5.37955e-24	2.48549e-22	Down-regulated gene
C14orf39|ENSG00000179008|protein_coding	-2.72305	-2.27982	6.45151e-24	2.96611e-22	Down-regulated gene
MT1M|ENSG00000205364|protein_coding	-2.62344	2.19135	6.56526e-24	3.01101e-22	Down-regulated gene
SI|ENSG00000090402|protein_coding	-3.81493	6.46266	6.86241e-24	3.1396e-22	Down-regulated gene
FAM46B|ENSG00000158246|protein_coding	-2.67177	3.67708	6.94135e-24	3.16797e-22	Down-regulated gene
VEGFD|ENSG00000165197|protein_coding	-2.8734	1.03137	6.96324e-24	3.17022e-22	Down-regulated gene
KLF4|ENSG00000136826|protein_coding	-1.64956	6.85026	7.24364e-24	3.28191e-22	Down-regulated gene
MPP1|ENSG00000130830|protein_coding	-1.63201	4.48872	7.42893e-24	3.35773e-22	Down-regulated gene
ST6GALNAC6|ENSG00000160408|protein_coding	-1.29135	4.79253	8.11976e-24	3.66113e-22	Down-regulated gene
ANGPTL7|ENSG00000171819|protein_coding	-2.73045	0.341144	8.57584e-24	3.85748e-22	Down-regulated gene
PLCD1|ENSG00000187091|protein_coding	-1.38424	3.99159	8.68644e-24	3.89645e-22	Down-regulated gene
ACAA1|ENSG00000060971|protein_coding	-1.05675	5.22621	9.00798e-24	4.01327e-22	Down-regulated gene
RPRM|ENSG00000177519|protein_coding	-3.04236	0.105683	9.44325e-24	4.1972e-22	Down-regulated gene
RNF225|ENSG00000269855|protein_coding	-3.67159	-0.427363	9.82294e-24	4.35561e-22	Down-regulated gene
SLC22A17|ENSG00000092096|protein_coding	-2.00038	3.75479	1.02913e-23	4.55249e-22	Down-regulated gene
SLC2A4|ENSG00000181856|protein_coding	-2.66417	3.48708	1.09584e-23	4.8248e-22	Down-regulated gene
TCP11L2|ENSG00000166046|protein_coding	-1.43589	3.58017	1.44254e-23	6.30673e-22	Down-regulated gene
LIMS2|ENSG00000072163|protein_coding	-2.23307	5.56902	1.45856e-23	6.36189e-22	Down-regulated gene
SLC5A1|ENSG00000100170|protein_coding	-2.49295	6.13541	1.48982e-23	6.48313e-22	Down-regulated gene
UGT1A1|ENSG00000241635|protein_coding	-3.43964	2.76469	1.61177e-23	6.99757e-22	Down-regulated gene
MKNK2|ENSG00000099875|protein_coding	-1.14716	7.55358	1.64793e-23	7.138e-22	Down-regulated gene
RBPMS2|ENSG00000166831|protein_coding	-2.62735	4.679	2.11719e-23	9.10731e-22	Down-regulated gene
NECAB1|ENSG00000123119|protein_coding	-2.46487	2.07982	2.20765e-23	9.47465e-22	Down-regulated gene
ANKRD53|ENSG00000144031|protein_coding	-1.69309	0.121066	2.51159e-23	1.07054e-21	Down-regulated gene
TSC22D3|ENSG00000157514|protein_coding	-1.65665	6.62914	2.60685e-23	1.10862e-21	Down-regulated gene
ACACB|ENSG00000076555|protein_coding	-1.63292	5.14449	2.64327e-23	1.12156e-21	Down-regulated gene
EMILIN3|ENSG00000183798|protein_coding	-2.23877	0.445305	2.79297e-23	1.17973e-21	Down-regulated gene
ATP6V1G2|ENSG00000213760|protein_coding	-1.97497	-0.378654	2.88597e-23	1.21354e-21	Down-regulated gene
SHBG|ENSG00000129214|protein_coding	-2.4237	-0.433791	2.98768e-23	1.25349e-21	Down-regulated gene
SLC5A11|ENSG00000158865|protein_coding	-2.55579	-0.528585	3.05574e-23	1.27632e-21	Down-regulated gene
CHODL|ENSG00000154645|protein_coding	-2.76692	0.177036	3.89245e-23	1.62217e-21	Down-regulated gene
C1QTNF2|ENSG00000145861|protein_coding	-1.909	1.11956	4.14123e-23	1.71446e-21	Down-regulated gene
ATP1B2|ENSG00000129244|protein_coding	-2.07023	2.34618	4.14138e-23	1.71446e-21	Down-regulated gene
PLN|ENSG00000198523|protein_coding	-2.83283	5.13441	4.37615e-23	1.80765e-21	Down-regulated gene
FOXF1|ENSG00000103241|protein_coding	-1.91164	5.33784	4.43786e-23	1.8291e-21	Down-regulated gene
ACBD4|ENSG00000181513|protein_coding	-1.01447	3.50031	4.45202e-23	1.83091e-21	Down-regulated gene
NRXN1|ENSG00000179915|protein_coding	-2.89305	1.56308	4.75342e-23	1.9463e-21	Down-regulated gene
SLC5A7|ENSG00000115665|protein_coding	-3.34821	-0.31314	5.25726e-23	2.1479e-21	Down-regulated gene
CDHR5|ENSG00000099834|protein_coding	-2.37257	7.09203	5.35945e-23	2.18488e-21	Down-regulated gene
FOXF2|ENSG00000137273|protein_coding	-1.96518	4.57116	5.8293e-23	2.37126e-21	Down-regulated gene
SEPT5|ENSG00000184702|protein_coding	-1.83108	3.4229	6.55479e-23	2.65483e-21	Down-regulated gene
FAXDC2|ENSG00000170271|protein_coding	-1.97924	4.4447	6.70663e-23	2.71046e-21	Down-regulated gene
ARL4D|ENSG00000175906|protein_coding	-2.32197	2.32661	6.77669e-23	2.73288e-21	Down-regulated gene
PRRT4|ENSG00000224940|protein_coding	-2.79918	-0.54193	6.99555e-23	2.81507e-21	Down-regulated gene
PNCK|ENSG00000130822|protein_coding	-3.03708	2.96823	7.17895e-23	2.8765e-21	Down-regulated gene
PITPNM3|ENSG00000091622|protein_coding	-2.06326	4.65343	7.53735e-23	3.01365e-21	Down-regulated gene
NEGR1|ENSG00000172260|protein_coding	-2.30469	4.23674	7.67665e-23	3.0628e-21	Down-regulated gene
METTL7A|ENSG00000185432|protein_coding	-1.57502	6.17247	8.16464e-23	3.24367e-21	Down-regulated gene
C1QL1|ENSG00000131094|protein_coding	-2.26532	1.7593	8.53891e-23	3.36379e-21	Down-regulated gene
DMPK|ENSG00000104936|protein_coding	-1.89183	5.65416	8.63558e-23	3.39472e-21	Down-regulated gene
AC136428.1|ENSG00000259680|protein_coding	-3.26021	0.635758	9.07433e-23	3.54486e-21	Down-regulated gene
SMIM5|ENSG00000204323|protein_coding	-1.98299	2.12068	9.53245e-23	3.70834e-21	Down-regulated gene
GHR|ENSG00000112964|protein_coding	-2.14141	2.55658	1.14e-22	4.42567e-21	Down-regulated gene
APOBEC1|ENSG00000111701|protein_coding	-2.97197	2.31545	1.25809e-22	4.86394e-21	Down-regulated gene
GFOD1|ENSG00000145990|protein_coding	-1.69684	4.40538	1.28394e-22	4.95361e-21	Down-regulated gene
SLC10A6|ENSG00000145283|protein_coding	-2.34682	-0.115185	1.30346e-22	5.01859e-21	Down-regulated gene
CALCOCO1|ENSG00000012822|protein_coding	-1.12353	6.02589	1.4156e-22	5.41692e-21	Down-regulated gene
NOS1|ENSG00000089250|protein_coding	-2.90742	1.15365	1.44406e-22	5.50332e-21	Down-regulated gene
TTC9|ENSG00000133985|protein_coding	-2.18004	4.44362	1.50508e-22	5.72421e-21	Down-regulated gene
SUSD2|ENSG00000099994|protein_coding	-1.9219	4.5431	1.56817e-22	5.93998e-21	Down-regulated gene
GSTA1|ENSG00000243955|protein_coding	-3.15196	5.41433	1.58348e-22	5.98586e-21	Down-regulated gene
PTCHD1|ENSG00000165186|protein_coding	-3.00454	2.53505	1.80902e-22	6.81094e-21	Down-regulated gene
DNAJB5|ENSG00000137094|protein_coding	-2.21405	4.60717	1.89422e-22	7.1174e-21	Down-regulated gene
GJB2|ENSG00000165474|protein_coding	-2.23397	6.46063	2.00109e-22	7.5039e-21	Down-regulated gene
CRCT1|ENSG00000169509|protein_coding	-5.42343	4.55117	2.11583e-22	7.91828e-21	Down-regulated gene
MZB1|ENSG00000170476|protein_coding	-2.44821	4.83905	2.57129e-22	9.58446e-21	Down-regulated gene
LYPD3|ENSG00000124466|protein_coding	-3.17154	5.42851	2.58847e-22	9.62933e-21	Down-regulated gene
MXD1|ENSG00000059728|protein_coding	-1.61102	6.71702	2.66084e-22	9.87891e-21	Down-regulated gene
NPR1|ENSG00000169418|protein_coding	-1.7252	3.25327	2.83139e-22	1.04913e-20	Down-regulated gene
CKM|ENSG00000104879|protein_coding	-2.77953	0.121164	2.95091e-22	1.09125e-20	Down-regulated gene
SBSN|ENSG00000189001|protein_coding	-4.70596	4.75988	3.04294e-22	1.12307e-20	Down-regulated gene
MOGAT2|ENSG00000166391|protein_coding	-3.10446	4.55238	3.06161e-22	1.12616e-20	Down-regulated gene
CCDC146|ENSG00000135205|protein_coding	-1.60979	2.92319	3.21702e-22	1.18033e-20	Down-regulated gene
ZNF331|ENSG00000130844|protein_coding	-1.77092	4.22352	3.33068e-22	1.21489e-20	Down-regulated gene
RERG|ENSG00000134533|protein_coding	-2.22924	3.74728	3.60708e-22	1.31315e-20	Down-regulated gene
NDRG2|ENSG00000165795|protein_coding	-1.41225	5.76131	3.76077e-22	1.36644e-20	Down-regulated gene
HADH|ENSG00000138796|protein_coding	-1.09581	5.95898	3.78843e-22	1.37382e-20	Down-regulated gene
NKX6-2|ENSG00000148826|protein_coding	-3.93598	2.19979	3.9739e-22	1.43829e-20	Down-regulated gene
PLCL1|ENSG00000115896|protein_coding	-1.6281	2.62055	4.14309e-22	1.49088e-20	Down-regulated gene
ADA|ENSG00000196839|protein_coding	-1.71819	4.15131	4.16751e-22	1.49678e-20	Down-regulated gene
FNDC5|ENSG00000160097|protein_coding	-2.23796	1.38465	4.19907e-22	1.50523e-20	Down-regulated gene
CSRP1|ENSG00000159176|protein_coding	-1.96677	8.95201	4.50829e-22	1.61298e-20	Down-regulated gene
ADGRG4|ENSG00000156920|protein_coding	-3.34266	-1.47884	4.65639e-22	1.66279e-20	Down-regulated gene
IMPG2|ENSG00000081148|protein_coding	-1.87358	-0.780452	4.759e-22	1.6962e-20	Down-regulated gene
PDLIM2|ENSG00000120913|protein_coding	-1.32041	4.75154	4.88701e-22	1.73851e-20	Down-regulated gene
GKN1|ENSG00000169605|protein_coding	-4.68877	9.99757	4.94909e-22	1.75726e-20	Down-regulated gene
GLUL|ENSG00000135821|protein_coding	-1.22075	8.52227	5.3927e-22	1.90393e-20	Down-regulated gene
GPER1|ENSG00000164850|protein_coding	-2.27559	2.39671	5.44226e-22	1.91781e-20	Down-regulated gene
SLC52A1|ENSG00000132517|protein_coding	-2.35561	1.19245	6.14775e-22	2.15829e-20	Down-regulated gene
XKR4|ENSG00000206579|protein_coding	-2.61194	0.801734	6.22027e-22	2.17966e-20	Down-regulated gene
NKAPL|ENSG00000189134|protein_coding	-2.04403	-1.03716	6.42716e-22	2.24794e-20	Down-regulated gene
TIAM1|ENSG00000156299|protein_coding	-1.88564	3.54123	7.12948e-22	2.48893e-20	Down-regulated gene
ANKRD9|ENSG00000156381|protein_coding	-1.12544	5.42727	7.48364e-22	2.60771e-20	Down-regulated gene
COL21A1|ENSG00000124749|protein_coding	-2.20256	1.70261	8.46193e-22	2.93221e-20	Down-regulated gene
CYB5A|ENSG00000166347|protein_coding	-1.14649	5.84192	9.10145e-22	3.1364e-20	Down-regulated gene
CDKN1A|ENSG00000124762|protein_coding	-1.38627	7.0517	9.74623e-22	3.35242e-20	Down-regulated gene
HRH2|ENSG00000113749|protein_coding	-1.82215	1.38227	9.95537e-22	3.41807e-20	Down-regulated gene
SLITRK3|ENSG00000121871|protein_coding	-3.1157	-0.29354	1.01431e-21	3.47616e-20	Down-regulated gene
CADM2|ENSG00000175161|protein_coding	-2.89554	0.830319	1.01771e-21	3.48141e-20	Down-regulated gene
JDP2|ENSG00000140044|protein_coding	-1.10482	4.47947	1.02804e-21	3.51036e-20	Down-regulated gene
SSBP2|ENSG00000145687|protein_coding	-1.69101	4.1128	1.04335e-21	3.55615e-20	Down-regulated gene
PSCA|ENSG00000167653|protein_coding	-3.43979	8.61405	1.14804e-21	3.90583e-20	Down-regulated gene
ATP1A2|ENSG00000018625|protein_coding	-3.06596	4.0003	1.18435e-21	4.02205e-20	Down-regulated gene
ITGB1BP2|ENSG00000147166|protein_coding	-1.87253	0.531542	1.24755e-21	4.22137e-20	Down-regulated gene
TGM1|ENSG00000092295|protein_coding	-3.62434	4.89538	1.28211e-21	4.33047e-20	Down-regulated gene
ARHGEF25|ENSG00000240771|protein_coding	-2.03661	3.71432	1.28696e-21	4.33903e-20	Down-regulated gene
MEI1|ENSG00000167077|protein_coding	-1.85171	2.23806	1.32404e-21	4.44801e-20	Down-regulated gene
PXMP2|ENSG00000176894|protein_coding	-1.26147	3.85525	1.36398e-21	4.57398e-20	Down-regulated gene
C15orf59|ENSG00000205363|protein_coding	-2.18169	1.74457	1.48643e-21	4.97569e-20	Down-regulated gene
BMPER|ENSG00000164619|protein_coding	-2.30801	1.2387	1.51842e-21	5.07371e-20	Down-regulated gene
JAM2|ENSG00000154721|protein_coding	-1.89086	4.24183	1.57512e-21	5.24444e-20	Down-regulated gene
CACNB2|ENSG00000165995|protein_coding	-2.02035	2.76333	1.67239e-21	5.55839e-20	Down-regulated gene
ACO2|ENSG00000100412|protein_coding	-1.00348	6.84561	1.72335e-21	5.70748e-20	Down-regulated gene
DNAJC18|ENSG00000170464|protein_coding	-1.33205	2.94395	1.81238e-21	5.98118e-20	Down-regulated gene
SEMA6D|ENSG00000137872|protein_coding	-1.98464	3.45135	2.02332e-21	6.65383e-20	Down-regulated gene
PLA2G2C|ENSG00000187980|protein_coding	-2.46925	-2.34247	2.12111e-21	6.92675e-20	Down-regulated gene
FKBP5|ENSG00000096060|protein_coding	-1.57133	6.19269	2.23011e-21	7.26999e-20	Down-regulated gene
RNF122|ENSG00000133874|protein_coding	-1.29713	3.20126	2.2703e-21	7.38815e-20	Down-regulated gene
DGKG|ENSG00000058866|protein_coding	-2.09464	2.80364	2.33487e-21	7.58509e-20	Down-regulated gene
NEFL|ENSG00000277586|protein_coding	-3.18279	0.784012	2.39747e-21	7.77494e-20	Down-regulated gene
JUNB|ENSG00000171223|protein_coding	-1.35187	8.21182	2.57123e-21	8.30964e-20	Down-regulated gene
SIDT2|ENSG00000149577|protein_coding	-1.11193	6.24409	2.96986e-21	9.54844e-20	Down-regulated gene
BTD|ENSG00000169814|protein_coding	-1.09046	4.39746	3.06194e-21	9.81079e-20	Down-regulated gene
SCN7A|ENSG00000136546|protein_coding	-2.88016	2.66661	3.22654e-21	1.03202e-19	Down-regulated gene
TMEM25|ENSG00000149582|protein_coding	-1.67171	3.75635	3.23194e-21	1.03202e-19	Down-regulated gene
CYBRD1|ENSG00000071967|protein_coding	-1.79486	6.91525	3.54286e-21	1.12745e-19	Down-regulated gene
DNASE1L3|ENSG00000163687|protein_coding	-2.27983	2.04453	3.94983e-21	1.25482e-19	Down-regulated gene
CAP2|ENSG00000112186|protein_coding	-2.08825	4.16143	4.33577e-21	1.3751e-19	Down-regulated gene
SLC7A8|ENSG00000092068|protein_coding	-1.6578	5.88899	4.62226e-21	1.46348e-19	Down-regulated gene
ABCG8|ENSG00000143921|protein_coding	-3.09007	1.59744	4.73427e-21	1.49641e-19	Down-regulated gene
MAP3K20|ENSG00000091436|protein_coding	-1.69342	7.19978	4.96234e-21	1.56059e-19	Down-regulated gene
TGFB1I1|ENSG00000140682|protein_coding	-1.79865	6.26817	4.99701e-21	1.56886e-19	Down-regulated gene
TNFSF12|ENSG00000239697|protein_coding	-1.40831	4.17688	5.18372e-21	1.62475e-19	Down-regulated gene
CGNL1|ENSG00000128849|protein_coding	-1.99803	4.16854	5.22887e-21	1.63616e-19	Down-regulated gene
PPP1R12C|ENSG00000125503|protein_coding	-1.23679	6.34499	5.31146e-21	1.65647e-19	Down-regulated gene
TP53INP2|ENSG00000078804|protein_coding	-1.35645	6.60462	5.75282e-21	1.78815e-19	Down-regulated gene
GGN|ENSG00000179168|protein_coding	-1.49849	0.450875	6.86173e-21	2.11876e-19	Down-regulated gene
STON1|ENSG00000243244|protein_coding	-2.06599	4.34982	6.87941e-21	2.12072e-19	Down-regulated gene
SLC2A2|ENSG00000163581|protein_coding	-3.7376	1.09615	7.51736e-21	2.30977e-19	Down-regulated gene
SOX17|ENSG00000164736|protein_coding	-1.58017	2.27243	7.79548e-21	2.38339e-19	Down-regulated gene
PGM5|ENSG00000154330|protein_coding	-2.7357	5.78867	8.42653e-21	2.56386e-19	Down-regulated gene
FAM129A|ENSG00000135842|protein_coding	-2.11736	6.76265	8.54324e-21	2.59515e-19	Down-regulated gene
HOXA4|ENSG00000197576|protein_coding	-1.91844	1.97393	8.74919e-21	2.6534e-19	Down-regulated gene
PDE2A|ENSG00000186642|protein_coding	-1.75416	3.43309	8.94072e-21	2.7071e-19	Down-regulated gene
TUBAL3|ENSG00000178462|protein_coding	-2.9158	1.26385	9.939e-21	2.99965e-19	Down-regulated gene
SLC5A5|ENSG00000105641|protein_coding	-3.37136	4.41056	1.03337e-20	3.10875e-19	Down-regulated gene
CA11|ENSG00000063180|protein_coding	-1.41275	2.67025	1.05331e-20	3.16366e-19	Down-regulated gene
P2RY1|ENSG00000169860|protein_coding	-1.93315	2.57474	1.0872e-20	3.26022e-19	Down-regulated gene
APOA1|ENSG00000118137|protein_coding	-3.92601	6.9677	1.14988e-20	3.43166e-19	Down-regulated gene
TMOD1|ENSG00000136842|protein_coding	-2.27594	3.22468	1.21811e-20	3.62951e-19	Down-regulated gene
KLF15|ENSG00000163884|protein_coding	-2.32315	2.49755	1.26244e-20	3.75561e-19	Down-regulated gene
S100A9|ENSG00000163220|protein_coding	-3.28752	8.4141	1.35987e-20	4.03262e-19	Down-regulated gene
MLNR|ENSG00000102539|protein_coding	-3.17917	-0.417694	1.47449e-20	4.34368e-19	Down-regulated gene
PRADC1|ENSG00000135617|protein_coding	-1.1197	3.67086	1.51265e-20	4.43648e-19	Down-regulated gene
TFF1|ENSG00000160182|protein_coding	-3.07202	9.45416	1.71341e-20	5.00177e-19	Down-regulated gene
MAPK3|ENSG00000102882|protein_coding	-1.09267	7.18929	1.7207e-20	5.01523e-19	Down-regulated gene
CLIC3|ENSG00000169583|protein_coding	-2.34175	4.48035	1.79688e-20	5.22913e-19	Down-regulated gene
MYOM2|ENSG00000036448|protein_coding	-1.65674	0.903599	1.97434e-20	5.73662e-19	Down-regulated gene
CRISP3|ENSG00000096006|protein_coding	-4.40044	4.56959	2.23884e-20	6.485e-19	Down-regulated gene
TPM2|ENSG00000198467|protein_coding	-2.27322	8.53046	2.29997e-20	6.65178e-19	Down-regulated gene
TGFBR3|ENSG00000069702|protein_coding	-1.74805	5.53921	2.30383e-20	6.65267e-19	Down-regulated gene
ARHGEF37|ENSG00000183111|protein_coding	-1.45303	4.2181	2.34848e-20	6.76074e-19	Down-regulated gene
ANGPTL1|ENSG00000116194|protein_coding	-2.73686	3.68592	2.44308e-20	6.99006e-19	Down-regulated gene
PDZD4|ENSG00000067840|protein_coding	-2.32537	2.37812	2.62118e-20	7.46538e-19	Down-regulated gene
ZBTB4|ENSG00000174282|protein_coding	-1.09362	6.7059	2.85826e-20	8.11589e-19	Down-regulated gene
KCNJ13|ENSG00000115474|protein_coding	-2.28217	0.158994	3.27528e-20	9.2161e-19	Down-regulated gene
GSDMC|ENSG00000147697|protein_coding	-2.72966	1.01516	3.28369e-20	9.22589e-19	Down-regulated gene
KLF2|ENSG00000127528|protein_coding	-1.66648	6.74857	3.42643e-20	9.59811e-19	Down-regulated gene
EPHA7|ENSG00000135333|protein_coding	-2.91846	3.76333	3.50898e-20	9.81466e-19	Down-regulated gene
CPA4|ENSG00000128510|protein_coding	-3.1369	0.889186	3.72127e-20	1.03929e-18	Down-regulated gene
CCDC107|ENSG00000159884|protein_coding	-1.30496	3.23687	3.82591e-20	1.06533e-18	Down-regulated gene
ARHGEF26|ENSG00000114790|protein_coding	-2.14964	3.90707	3.84308e-20	1.06853e-18	Down-regulated gene
EGR1|ENSG00000120738|protein_coding	-1.78315	8.06921	3.94343e-20	1.09318e-18	Down-regulated gene
SLC7A9|ENSG00000021488|protein_coding	-2.88936	2.90286	3.95726e-20	1.09539e-18	Down-regulated gene
ACADM|ENSG00000117054|protein_coding	-1.01746	5.41757	4.17923e-20	1.15342e-18	Down-regulated gene
CAPNS2|ENSG00000256812|protein_coding	-3.99406	0.451629	4.23658e-20	1.16752e-18	Down-regulated gene
NKX6-1|ENSG00000163623|protein_coding	-3.35562	1.06194	4.24445e-20	1.16797e-18	Down-regulated gene
BHMT2|ENSG00000132840|protein_coding	-2.09731	1.6678	4.8316e-20	1.32564e-18	Down-regulated gene
PTH1R|ENSG00000160801|protein_coding	-1.88805	0.228075	5.0182e-20	1.37282e-18	Down-regulated gene
AARD|ENSG00000205002|protein_coding	-2.49596	0.163663	5.02822e-20	1.37355e-18	Down-regulated gene
KPRP|ENSG00000203786|protein_coding	-5.30596	1.4467	5.12894e-20	1.39902e-18	Down-regulated gene
KLK12|ENSG00000186474|protein_coding	-3.54161	2.37529	5.62441e-20	1.52875e-18	Down-regulated gene
CEBPD|ENSG00000221869|protein_coding	-1.29818	7.20593	5.62904e-20	1.52875e-18	Down-regulated gene
FAM25C|ENSG00000276430|protein_coding	-3.57681	-4.27856	5.75757e-20	1.56139e-18	Down-regulated gene
CHAD|ENSG00000136457|protein_coding	-2.24607	1.12365	6.67775e-20	1.80049e-18	Down-regulated gene
EPHA6|ENSG00000080224|protein_coding	-2.89357	-0.500489	6.9693e-20	1.8737e-18	Down-regulated gene
NKX3-1|ENSG00000167034|protein_coding	-1.93028	2.39193	7.06587e-20	1.89694e-18	Down-regulated gene
RSPO2|ENSG00000147655|protein_coding	-2.64671	1.45616	7.14563e-20	1.9156e-18	Down-regulated gene
COL4A5|ENSG00000188153|protein_coding	-2.13173	4.64945	7.17155e-20	1.9198e-18	Down-regulated gene
SERTAD1|ENSG00000197019|protein_coding	-1.14002	4.20249	7.31722e-20	1.956e-18	Down-regulated gene
CASQ2|ENSG00000118729|protein_coding	-2.92013	3.35116	7.51034e-20	2.00476e-18	Down-regulated gene
TMEM108|ENSG00000144868|protein_coding	-1.63839	1.17595	7.62393e-20	2.03218e-18	Down-regulated gene
MUC21|ENSG00000204544|protein_coding	-5.00134	6.64877	8.15302e-20	2.17012e-18	Down-regulated gene
KY|ENSG00000174611|protein_coding	-2.1217	0.204036	8.22166e-20	2.17972e-18	Down-regulated gene
HOPX|ENSG00000171476|protein_coding	-2.14343	5.28147	8.22405e-20	2.17972e-18	Down-regulated gene
CLIP3|ENSG00000105270|protein_coding	-1.8873	5.17331	8.45787e-20	2.23852e-18	Down-regulated gene
BDKRB1|ENSG00000100739|protein_coding	-1.68034	1.36499	8.50008e-20	2.24652e-18	Down-regulated gene
TNFAIP8L3|ENSG00000183578|protein_coding	-1.8637	1.94502	9.12534e-20	2.39822e-18	Down-regulated gene
USH1G|ENSG00000182040|protein_coding	-3.38455	-0.0904963	9.17831e-20	2.40876e-18	Down-regulated gene
NLRX1|ENSG00000160703|protein_coding	-1.11475	4.65405	9.26166e-20	2.42723e-18	Down-regulated gene
NTN1|ENSG00000065320|protein_coding	-2.09531	5.30577	9.42811e-20	2.46395e-18	Down-regulated gene
ALDH3A2|ENSG00000072210|protein_coding	-1.11233	6.48251	1.04812e-19	2.73535e-18	Down-regulated gene
JUND|ENSG00000130522|protein_coding	-1.09597	8.30973	1.09753e-19	2.84841e-18	Down-regulated gene
FBP1|ENSG00000165140|protein_coding	-1.78717	6.28932	1.11807e-19	2.89368e-18	Down-regulated gene
TINCR|ENSG00000223573|protein_coding	-2.70423	1.19904	1.26214e-19	3.25754e-18	Down-regulated gene
C15orf62|ENSG00000188277|protein_coding	-1.68468	1.40386	1.30413e-19	3.35666e-18	Down-regulated gene
SLC25A20|ENSG00000178537|protein_coding	-1.11199	4.21487	1.3194e-19	3.39129e-18	Down-regulated gene
CYP4B1|ENSG00000142973|protein_coding	-2.81109	1.7132	1.38825e-19	3.55541e-18	Down-regulated gene
GSTA2|ENSG00000244067|protein_coding	-3.35104	2.83135	1.4068e-19	3.59617e-18	Down-regulated gene
METTL24|ENSG00000053328|protein_coding	-2.47463	1.41435	1.51957e-19	3.8581e-18	Down-regulated gene
KCNB1|ENSG00000158445|protein_coding	-2.84007	2.48266	1.5248e-19	3.86614e-18	Down-regulated gene
DAAM2|ENSG00000146122|protein_coding	-1.86598	4.87082	1.53467e-19	3.88589e-18	Down-regulated gene
ZNF750|ENSG00000141579|protein_coding	-3.30345	3.43841	1.5516e-19	3.92346e-18	Down-regulated gene
CTNNA3|ENSG00000183230|protein_coding	-2.96522	2.38875	1.65714e-19	4.17903e-18	Down-regulated gene
SLC25A42|ENSG00000181035|protein_coding	-1.05357	2.97099	1.6643e-19	4.19144e-18	Down-regulated gene
S100A8|ENSG00000143546|protein_coding	-3.4412	7.53366	1.66911e-19	4.19789e-18	Down-regulated gene
PCP4L1|ENSG00000248485|protein_coding	-2.92436	1.7307	1.68704e-19	4.23162e-18	Down-regulated gene
KCNMB1|ENSG00000145936|protein_coding	-2.37532	5.09504	1.7025e-19	4.25329e-18	Down-regulated gene
MINDY1|ENSG00000143409|protein_coding	-1.05004	4.91365	1.73256e-19	4.32263e-18	Down-regulated gene
ALDOC|ENSG00000109107|protein_coding	-1.48552	4.352	1.87245e-19	4.66542e-18	Down-regulated gene
THSD4|ENSG00000187720|protein_coding	-1.80593	4.96088	2.01266e-19	5.00144e-18	Down-regulated gene
LY6H|ENSG00000176956|protein_coding	-2.13342	-0.169718	2.10354e-19	5.22034e-18	Down-regulated gene
SMOC2|ENSG00000112562|protein_coding	-2.21392	6.68047	2.21687e-19	5.47979e-18	Down-regulated gene
DSC3|ENSG00000134762|protein_coding	-3.40964	4.58482	2.23587e-19	5.51947e-18	Down-regulated gene
CES2|ENSG00000172831|protein_coding	-1.86027	7.82802	2.40915e-19	5.92379e-18	Down-regulated gene
SNRPN|ENSG00000128739|protein_coding	-1.60081	3.90172	2.49428e-19	6.12505e-18	Down-regulated gene
TMEM40|ENSG00000088726|protein_coding	-3.51085	2.32499	2.51054e-19	6.15691e-18	Down-regulated gene
PSAPL1|ENSG00000178597|protein_coding	-3.34256	3.99082	2.59258e-19	6.34978e-18	Down-regulated gene
EIF4E3|ENSG00000163412|protein_coding	-1.2544	5.0085	2.69228e-19	6.5753e-18	Down-regulated gene
JAKMIP2|ENSG00000176049|protein_coding	-1.89483	1.22422	2.6952e-19	6.5753e-18	Down-regulated gene
GPR155|ENSG00000163328|protein_coding	-1.80406	4.74689	2.75957e-19	6.72358e-18	Down-regulated gene
MYOM1|ENSG00000101605|protein_coding	-2.09001	3.26579	2.82913e-19	6.87515e-18	Down-regulated gene
RASD2|ENSG00000100302|protein_coding	-1.73872	3.26606	2.85014e-19	6.91721e-18	Down-regulated gene
MME|ENSG00000196549|protein_coding	-2.57238	5.12668	3.02233e-19	7.30671e-18	Down-regulated gene
MPC1|ENSG00000060762|protein_coding	-1.07038	5.24156	3.1054e-19	7.48818e-18	Down-regulated gene
VWC2|ENSG00000188730|protein_coding	-2.75698	-0.274426	3.24013e-19	7.80299e-18	Down-regulated gene
MFSD4A|ENSG00000174514|protein_coding	-2.3118	4.95169	3.25391e-19	7.82129e-18	Down-regulated gene
PPP1R14A|ENSG00000167641|protein_coding	-2.09666	4.25891	3.33377e-19	7.99763e-18	Down-regulated gene
CWH43|ENSG00000109182|protein_coding	-4.1493	1.01484	3.51832e-19	8.41878e-18	Down-regulated gene
CORO6|ENSG00000167549|protein_coding	-1.91167	0.914919	3.53742e-19	8.45368e-18	Down-regulated gene
PBXIP1|ENSG00000163346|protein_coding	-1.11282	6.70727	3.67534e-19	8.73861e-18	Down-regulated gene
AKR1C1|ENSG00000187134|protein_coding	-2.22883	5.23358	3.7964e-19	9.00359e-18	Down-regulated gene
ID3|ENSG00000117318|protein_coding	-1.21647	5.51057	3.83914e-19	9.09342e-18	Down-regulated gene
KANK2|ENSG00000197256|protein_coding	-1.60428	6.87353	3.93318e-19	9.29264e-18	Down-regulated gene
PADI1|ENSG00000142623|protein_coding	-3.55326	2.93658	3.955e-19	9.33241e-18	Down-regulated gene
BEX4|ENSG00000102409|protein_coding	-1.69085	3.75765	4.40207e-19	1.03612e-17	Down-regulated gene
MS4A8|ENSG00000166959|protein_coding	-2.5988	3.59298	4.78025e-19	1.12372e-17	Down-regulated gene
PIRT|ENSG00000233670|protein_coding	-2.66578	-0.603741	5.2066e-19	1.21935e-17	Down-regulated gene
PCK1|ENSG00000124253|protein_coding	-2.97922	5.38666	5.39304e-19	1.25986e-17	Down-regulated gene
TXNIP|ENSG00000265972|protein_coding	-1.4489	9.12901	6.08195e-19	1.41549e-17	Down-regulated gene
AQP3|ENSG00000165272|protein_coding	-2.45175	6.23184	6.57982e-19	1.52756e-17	Down-regulated gene
PHGR1|ENSG00000233041|protein_coding	-2.97779	7.10187	6.91917e-19	1.60039e-17	Down-regulated gene
ETNPPL|ENSG00000164089|protein_coding	-3.23602	-0.599267	7.15142e-19	1.648e-17	Down-regulated gene
SCUBE2|ENSG00000175356|protein_coding	-1.97791	2.79542	8.00217e-19	1.83726e-17	Down-regulated gene
IL11RA|ENSG00000137070|protein_coding	-1.22283	2.15841	8.15107e-19	1.86721e-17	Down-regulated gene
DLG2|ENSG00000150672|protein_coding	-1.95293	1.79322	8.15258e-19	1.86721e-17	Down-regulated gene
PDZD2|ENSG00000133401|protein_coding	-1.5624	4.07987	9.19677e-19	2.0961e-17	Down-regulated gene
BDH2|ENSG00000164039|protein_coding	-1.11934	4.01506	9.21708e-19	2.09818e-17	Down-regulated gene
PM20D1|ENSG00000162877|protein_coding	-1.90656	-0.361187	9.25972e-19	2.10532e-17	Down-regulated gene
HMGCLL1|ENSG00000146151|protein_coding	-2.23888	-1.55978	9.68005e-19	2.19289e-17	Down-regulated gene
CYSTM1|ENSG00000120306|protein_coding	-1.7379	8.54302	1.05701e-18	2.38873e-17	Down-regulated gene
VSIG2|ENSG00000019102|protein_coding	-2.47056	6.16327	1.14939e-18	2.59043e-17	Down-regulated gene
BAG3|ENSG00000151929|protein_coding	-1.27925	6.55019	1.18894e-18	2.67397e-17	Down-regulated gene
TUBB6|ENSG00000176014|protein_coding	-1.49722	5.83682	1.32079e-18	2.95629e-17	Down-regulated gene
WFDC12|ENSG00000168703|protein_coding	-2.95681	-1.89974	1.40791e-18	3.14378e-17	Down-regulated gene
MPPED2|ENSG00000066382|protein_coding	-1.80958	0.835778	1.65309e-18	3.65634e-17	Down-regulated gene
PKIG|ENSG00000168734|protein_coding	-1.3307	5.24946	1.85304e-18	4.08412e-17	Down-regulated gene
PRDM8|ENSG00000152784|protein_coding	-1.8204	2.7227	1.92648e-18	4.236e-17	Down-regulated gene
ST3GAL3|ENSG00000126091|protein_coding	-1.22278	2.90796	2.13632e-18	4.67541e-17	Down-regulated gene
SORBS2|ENSG00000154556|protein_coding	-1.79098	5.52336	2.23712e-18	4.87891e-17	Down-regulated gene
CFL2|ENSG00000165410|protein_coding	-1.89457	5.60199	2.24832e-18	4.89761e-17	Down-regulated gene
ABCG4|ENSG00000172350|protein_coding	-1.67469	-0.83127	2.30219e-18	4.99751e-17	Down-regulated gene
LRRC10B|ENSG00000204950|protein_coding	-2.22946	1.35586	2.32821e-18	5.04231e-17	Down-regulated gene
NACAD|ENSG00000136274|protein_coding	-1.89659	2.24412	2.33627e-18	5.05391e-17	Down-regulated gene
EPGN|ENSG00000182585|protein_coding	-3.76371	0.14523	2.36973e-18	5.12037e-17	Down-regulated gene
LGI1|ENSG00000108231|protein_coding	-2.62319	-0.90388	2.43479e-18	5.24882e-17	Down-regulated gene
ACTN2|ENSG00000077522|protein_coding	-2.95369	2.02679	2.57095e-18	5.52961e-17	Down-regulated gene
IGFL1|ENSG00000188293|protein_coding	-4.01718	1.53397	2.58553e-18	5.55458e-17	Down-regulated gene
LMOD3|ENSG00000163380|protein_coding	-2.04083	-0.363169	2.62259e-18	5.62774e-17	Down-regulated gene
IL36A|ENSG00000136694|protein_coding	-5.20855	2.53376	2.67849e-18	5.7411e-17	Down-regulated gene
PLIN4|ENSG00000167676|protein_coding	-2.81554	5.23603	2.71656e-18	5.81604e-17	Down-regulated gene
SGCG|ENSG00000102683|protein_coding	-2.45846	-1.5108	2.80039e-18	5.98184e-17	Down-regulated gene
TNXB|ENSG00000168477|protein_coding	-2.13099	6.03436	2.95191e-18	6.29832e-17	Down-regulated gene
SFRP1|ENSG00000104332|protein_coding	-2.6396	4.83411	3.10004e-18	6.60683e-17	Down-regulated gene
SERPINB3|ENSG00000057149|protein_coding	-4.25257	4.76753	3.3561e-18	7.12011e-17	Down-regulated gene
TCEAL7|ENSG00000182916|protein_coding	-1.7842	1.11277	3.36961e-18	7.14068e-17	Down-regulated gene
CACNA2D3|ENSG00000157445|protein_coding	-1.78157	0.636403	3.44286e-18	7.2804e-17	Down-regulated gene
TMEM240|ENSG00000205090|protein_coding	-1.51191	-0.391295	3.51711e-18	7.41964e-17	Down-regulated gene
MEP1A|ENSG00000112818|protein_coding	-3.13585	5.16413	3.64998e-18	7.67397e-17	Down-regulated gene
BCKDHA|ENSG00000248098|protein_coding	-1.02069	2.01124	3.72045e-18	7.81336e-17	Down-regulated gene
FABP1|ENSG00000163586|protein_coding	-3.46624	6.56189	3.76229e-18	7.89238e-17	Down-regulated gene
DIRC3|ENSG00000231672|protein_coding	-1.87788	-1.20243	3.88776e-18	8.13734e-17	Down-regulated gene
BMP6|ENSG00000153162|protein_coding	-1.66602	1.95072	4.13663e-18	8.62928e-17	Down-regulated gene
SORCS1|ENSG00000108018|protein_coding	-2.50319	0.908276	4.28063e-18	8.9098e-17	Down-regulated gene
PKNOX2|ENSG00000165495|protein_coding	-1.87431	1.41376	4.5638e-18	9.47812e-17	Down-regulated gene
HBB|ENSG00000244734|protein_coding	-2.3538	5.28746	4.56975e-18	9.47995e-17	Down-regulated gene
MT-ND6|ENSG00000198695|protein_coding	-1.3224	10.1374	4.991e-18	1.03309e-16	Down-regulated gene
FAM161B|ENSG00000156050|protein_coding	-1.06493	2.2229	5.11016e-18	1.05659e-16	Down-regulated gene
ADH7|ENSG00000196344|protein_coding	-4.39854	3.08182	5.16818e-18	1.06741e-16	Down-regulated gene
AQP7|ENSG00000165269|protein_coding	-1.93272	1.68883	5.36591e-18	1.1058e-16	Down-regulated gene
ACOX2|ENSG00000168306|protein_coding	-1.74618	2.93138	5.63251e-18	1.15819e-16	Down-regulated gene
GYPC|ENSG00000136732|protein_coding	-1.55773	4.70761	5.76393e-18	1.18262e-16	Down-regulated gene
SERTM1|ENSG00000180440|protein_coding	-3.3975	-1.94189	5.9661e-18	1.22276e-16	Down-regulated gene
TAC3|ENSG00000166863|protein_coding	-2.40636	1.29013	6.08137e-18	1.24502e-16	Down-regulated gene
ITGA8|ENSG00000077943|protein_coding	-2.07609	4.66459	6.27438e-18	1.28313e-16	Down-regulated gene
PARD6G|ENSG00000178184|protein_coding	-1.35416	3.02448	6.51497e-18	1.33087e-16	Down-regulated gene
MRO|ENSG00000134042|protein_coding	-1.74213	0.465977	6.60873e-18	1.34856e-16	Down-regulated gene
MAP6|ENSG00000171533|protein_coding	-1.96039	2.69256	6.64472e-18	1.35442e-16	Down-regulated gene
FAM229B|ENSG00000203778|protein_coding	-1.51608	2.08515	6.84963e-18	1.39164e-16	Down-regulated gene
CERS3|ENSG00000154227|protein_coding	-3.65599	1.91028	6.91675e-18	1.40376e-16	Down-regulated gene
DOCK3|ENSG00000088538|protein_coding	-1.97418	2.01082	6.98233e-18	1.41553e-16	Down-regulated gene
C1orf115|ENSG00000162817|protein_coding	-1.58542	4.83685	7.24092e-18	1.46636e-16	Down-regulated gene
SLC6A19|ENSG00000174358|protein_coding	-3.1509	5.6328	7.31632e-18	1.47967e-16	Down-regulated gene
DEFA6|ENSG00000164822|protein_coding	-4.61411	3.92438	7.3839e-18	1.49048e-16	Down-regulated gene
NRG2|ENSG00000158458|protein_coding	-2.06472	0.589151	7.73555e-18	1.55978e-16	Down-regulated gene
FAT2|ENSG00000086570|protein_coding	-3.07846	3.35571	8.066e-18	1.62466e-16	Down-regulated gene
CC2D2A|ENSG00000048342|protein_coding	-1.3438	3.65629	8.16628e-18	1.64309e-16	Down-regulated gene
PHOX2A|ENSG00000165462|protein_coding	-3.08591	-1.66256	8.1939e-18	1.64688e-16	Down-regulated gene
LMOD1|ENSG00000163431|protein_coding	-2.52516	7.07032	8.62179e-18	1.72916e-16	Down-regulated gene
PDLIM3|ENSG00000154553|protein_coding	-2.00917	6.82029	8.8149e-18	1.766e-16	Down-regulated gene
SNX31|ENSG00000174226|protein_coding	-2.60705	-0.712551	9.28848e-18	1.85889e-16	Down-regulated gene
FAM117A|ENSG00000121104|protein_coding	-1.2728	4.43361	9.48666e-18	1.89652e-16	Down-regulated gene
GRHL1|ENSG00000134317|protein_coding	-1.8735	4.09003	9.67038e-18	1.93119e-16	Down-regulated gene
ACADS|ENSG00000122971|protein_coding	-1.28591	5.27153	9.78435e-18	1.95186e-16	Down-regulated gene
GRIA2|ENSG00000120251|protein_coding	-3.02565	-0.843065	9.8384e-18	1.96056e-16	Down-regulated gene
KRT2|ENSG00000172867|protein_coding	-2.78504	-1.58526	9.89782e-18	1.9703e-16	Down-regulated gene
PGR|ENSG00000082175|protein_coding	-2.04964	2.17496	9.99921e-18	1.98837e-16	Down-regulated gene
SOSTDC1|ENSG00000171243|protein_coding	-2.82673	3.37665	1.01684e-17	2.01773e-16	Down-regulated gene
SELENOM|ENSG00000198832|protein_coding	-1.55571	6.32223	1.02098e-17	2.02379e-16	Down-regulated gene
RYR3|ENSG00000198838|protein_coding	-2.09615	2.07113	1.02299e-17	2.02564e-16	Down-regulated gene
ANGPTL6|ENSG00000130812|protein_coding	-1.67661	0.158839	1.02533e-17	2.02811e-16	Down-regulated gene
KLHDC8B|ENSG00000185909|protein_coding	-1.19541	3.50079	1.03054e-17	2.03628e-16	Down-regulated gene
GHRL|ENSG00000157017|protein_coding	-2.77384	3.20713	1.08681e-17	2.14293e-16	Down-regulated gene
PAQR7|ENSG00000182749|protein_coding	-1.25374	3.52387	1.1044e-17	2.17303e-16	Down-regulated gene
FOXN1|ENSG00000109101|protein_coding	-2.97004	0.649956	1.17425e-17	2.30803e-16	Down-regulated gene
PGLYRP3|ENSG00000159527|protein_coding	-3.62103	1.30416	1.18129e-17	2.31944e-16	Down-regulated gene
TRIM40|ENSG00000204614|protein_coding	-2.45529	1.518	1.1969e-17	2.34762e-16	Down-regulated gene
BNC1|ENSG00000169594|protein_coding	-3.15135	0.871048	1.21599e-17	2.38257e-16	Down-regulated gene
PLEKHO1|ENSG00000023902|protein_coding	-1.46401	5.55769	1.26223e-17	2.46543e-16	Down-regulated gene
HRASLS2|ENSG00000133328|protein_coding	-2.4069	2.53131	1.26356e-17	2.46545e-16	Down-regulated gene
RGS5|ENSG00000143248|protein_coding	-1.50626	8.40516	1.43376e-17	2.78016e-16	Down-regulated gene
REP15|ENSG00000174236|protein_coding	-2.46486	0.491584	1.44078e-17	2.79087e-16	Down-regulated gene
NIPAL4|ENSG00000172548|protein_coding	-2.49991	1.63757	1.44692e-17	2.79987e-16	Down-regulated gene
CDH19|ENSG00000071991|protein_coding	-2.72183	1.95633	1.46374e-17	2.82949e-16	Down-regulated gene
KRT4|ENSG00000170477|protein_coding	-4.83698	9.7214	1.5017e-17	2.89988e-16	Down-regulated gene
ACY1|ENSG00000243989|protein_coding	-1.38892	3.14414	1.58692e-17	3.06128e-16	Down-regulated gene
FETUB|ENSG00000090512|protein_coding	-3.92929	-1.38351	1.59711e-17	3.07144e-16	Down-regulated gene
C1QTNF7|ENSG00000163145|protein_coding	-2.17336	2.50252	1.59891e-17	3.07175e-16	Down-regulated gene
FAM212B|ENSG00000197852|protein_coding	-1.33294	3.01517	1.6134e-17	3.09138e-16	Down-regulated gene
EPB41L3|ENSG00000082397|protein_coding	-1.50618	4.46142	1.74626e-17	3.3411e-16	Down-regulated gene
GABRA5|ENSG00000186297|protein_coding	-3.16904	-0.813642	1.76292e-17	3.36609e-16	Down-regulated gene
ITIH5|ENSG00000123243|protein_coding	-1.80193	5.20411	1.79721e-17	3.42458e-16	Down-regulated gene
MGST3|ENSG00000143198|protein_coding	-1.01442	6.73831	1.81578e-17	3.45645e-16	Down-regulated gene
NR1I3|ENSG00000143257|protein_coding	-1.51865	-0.694632	1.88847e-17	3.59116e-16	Down-regulated gene
EVPL|ENSG00000167880|protein_coding	-1.84827	6.88691	1.93195e-17	3.67012e-16	Down-regulated gene
AC004754.1|ENSG00000269881|protein_coding	-1.6307	-1.32924	1.9657e-17	3.72666e-16	Down-regulated gene
MAPK10|ENSG00000109339|protein_coding	-1.78429	2.63693	1.99379e-17	3.7761e-16	Down-regulated gene
KCNJ16|ENSG00000153822|protein_coding	-2.92007	1.84565	2.14541e-17	4.05503e-16	Down-regulated gene
ENTPD5|ENSG00000187097|protein_coding	-1.33709	5.58581	2.18955e-17	4.13429e-16	Down-regulated gene
RAB30|ENSG00000137502|protein_coding	-1.15094	4.46331	2.35655e-17	4.44067e-16	Down-regulated gene
REEP2|ENSG00000132563|protein_coding	-2.08713	2.48786	2.43876e-17	4.58607e-16	Down-regulated gene
LRRN4CL|ENSG00000177363|protein_coding	-1.75778	2.30244	2.45113e-17	4.60035e-16	Down-regulated gene
AKAP6|ENSG00000151320|protein_coding	-2.16896	3.67793	2.51628e-17	4.7179e-16	Down-regulated gene
SVIL|ENSG00000197321|protein_coding	-1.8027	7.58389	2.55577e-17	4.77757e-16	Down-regulated gene
TMPRSS11E|ENSG00000087128|protein_coding	-4.25472	3.55588	2.64439e-17	4.93831e-16	Down-regulated gene
MTURN|ENSG00000180354|protein_coding	-1.38259	4.82613	2.72429e-17	5.08245e-16	Down-regulated gene
CLCNKA|ENSG00000186510|protein_coding	-2.3979	-0.908962	2.76828e-17	5.15937e-16	Down-regulated gene
LOR|ENSG00000203782|protein_coding	-2.5292	-3.22757	3.02774e-17	5.60941e-16	Down-regulated gene
CABCOCO1|ENSG00000183346|protein_coding	-1.93645	-0.752362	3.07134e-17	5.68456e-16	Down-regulated gene
DGAT1|ENSG00000185000|protein_coding	-1.38141	6.95782	3.1219e-17	5.77243e-16	Down-regulated gene
GABARAPL1|ENSG00000139112|protein_coding	-1.19708	5.1757	3.19152e-17	5.89533e-16	Down-regulated gene
PDZRN3|ENSG00000121440|protein_coding	-1.83753	5.15636	3.19863e-17	5.90264e-16	Down-regulated gene
FAM129B|ENSG00000136830|protein_coding	-1.21605	8.26655	3.35398e-17	6.18029e-16	Down-regulated gene
RGMB|ENSG00000174136|protein_coding	-1.38021	4.58727	3.61256e-17	6.62999e-16	Down-regulated gene
DMD|ENSG00000198947|protein_coding	-1.98671	5.22202	3.61404e-17	6.62999e-16	Down-regulated gene
SLC6A1|ENSG00000157103|protein_coding	-1.59388	0.946546	3.85459e-17	7.03678e-16	Down-regulated gene
SLMAP|ENSG00000163681|protein_coding	-1.16578	6.92325	3.91645e-17	7.12885e-16	Down-regulated gene
TMEM220|ENSG00000187824|protein_coding	-1.4102	2.81965	3.93771e-17	7.16058e-16	Down-regulated gene
PTPN13|ENSG00000163629|protein_coding	-1.79851	3.90935	4.02052e-17	7.30407e-16	Down-regulated gene
PENK|ENSG00000181195|protein_coding	-3.10325	1.62888	4.1509e-17	7.51904e-16	Down-regulated gene
PER3|ENSG00000049246|protein_coding	-1.42443	4.96179	4.19939e-17	7.59951e-16	Down-regulated gene
MS4A18|ENSG00000214782|protein_coding	-3.62196	-1.28865	4.21072e-17	7.61134e-16	Down-regulated gene
CRHBP|ENSG00000145708|protein_coding	-1.76003	-1.03664	4.34672e-17	7.83582e-16	Down-regulated gene
TCEAL1|ENSG00000172465|protein_coding	-1.13188	3.78943	4.39239e-17	7.91053e-16	Down-regulated gene
TRIM50|ENSG00000146755|protein_coding	-3.10687	1.02098	4.58179e-17	8.23578e-16	Down-regulated gene
GLOD5|ENSG00000171433|protein_coding	-1.82327	0.420762	4.74229e-17	8.5161e-16	Down-regulated gene
GPT|ENSG00000167701|protein_coding	-2.13639	3.54502	4.76707e-17	8.55239e-16	Down-regulated gene
B3GNT8|ENSG00000177191|protein_coding	-1.75812	3.54873	5.0071e-17	8.96582e-16	Down-regulated gene
KCNIP4|ENSG00000185774|protein_coding	-1.21613	0.58592	5.07776e-17	9.08366e-16	Down-regulated gene
MMRN1|ENSG00000138722|protein_coding	-2.00601	3.3106	5.10376e-17	9.12144e-16	Down-regulated gene
BBOX1|ENSG00000129151|protein_coding	-2.46386	0.202795	5.46874e-17	9.74581e-16	Down-regulated gene
AKR7A3|ENSG00000162482|protein_coding	-1.97637	5.98359	5.52328e-17	9.83364e-16	Down-regulated gene
FABP5|ENSG00000164687|protein_coding	-1.83901	5.71827	5.55597e-17	9.87832e-16	Down-regulated gene
ALOX15B|ENSG00000179593|protein_coding	-2.18745	2.10154	5.87243e-17	1.03959e-15	Down-regulated gene
CLCA4|ENSG00000016602|protein_coding	-3.93667	5.18874	5.94164e-17	1.04986e-15	Down-regulated gene
HBA1|ENSG00000206172|protein_coding	-2.36786	1.62202	6.12092e-17	1.08052e-15	Down-regulated gene
PNOC|ENSG00000168081|protein_coding	-2.11435	0.648283	6.18709e-17	1.09014e-15	Down-regulated gene
C8orf88|ENSG00000253250|protein_coding	-2.30948	1.08616	6.62558e-17	1.1652e-15	Down-regulated gene
GRIK2|ENSG00000164418|protein_coding	-2.05455	-0.57392	6.73276e-17	1.18294e-15	Down-regulated gene
RNF150|ENSG00000170153|protein_coding	-2.11795	4.52922	6.85224e-17	1.20082e-15	Down-regulated gene
LTBP4|ENSG00000090006|protein_coding	-1.25351	7.97671	6.85374e-17	1.20082e-15	Down-regulated gene
SCIN|ENSG00000006747|protein_coding	-1.93566	4.13784	6.97481e-17	1.22089e-15	Down-regulated gene
DISP1|ENSG00000154309|protein_coding	-1.00907	3.47727	7.04542e-17	1.23209e-15	Down-regulated gene
SLC5A9|ENSG00000117834|protein_coding	-2.28442	2.23684	7.06002e-17	1.23234e-15	Down-regulated gene
ANGPT1|ENSG00000154188|protein_coding	-1.48789	2.60985	7.15939e-17	1.24736e-15	Down-regulated gene
LDB3|ENSG00000122367|protein_coding	-2.57152	3.83385	7.26816e-17	1.26513e-15	Down-regulated gene
NAP1L2|ENSG00000186462|protein_coding	-2.19474	0.631819	7.30162e-17	1.26978e-15	Down-regulated gene
RAB27A|ENSG00000069974|protein_coding	-1.08076	5.58885	7.41902e-17	1.28899e-15	Down-regulated gene
LRAT|ENSG00000121207|protein_coding	-2.59893	0.787564	7.54557e-17	1.30976e-15	Down-regulated gene
TRIM73|ENSG00000178809|protein_coding	-1.51829	-1.62663	7.59749e-17	1.31755e-15	Down-regulated gene
HDC|ENSG00000140287|protein_coding	-1.87084	1.09674	7.60733e-17	1.31804e-15	Down-regulated gene
ILK|ENSG00000166333|protein_coding	-1.20427	3.66206	7.75645e-17	1.34263e-15	Down-regulated gene
FBXL22|ENSG00000197361|protein_coding	-1.98878	2.67205	7.76778e-17	1.34335e-15	Down-regulated gene
LGALS7B|ENSG00000178934|protein_coding	-3.3197	1.83417	7.86991e-17	1.3585e-15	Down-regulated gene
YOD1|ENSG00000180667|protein_coding	-1.3796	4.9469	7.90728e-17	1.3637e-15	Down-regulated gene
SORCS3|ENSG00000156395|protein_coding	-2.63511	-1.43967	8.05557e-17	1.38671e-15	Down-regulated gene
ATF3|ENSG00000162772|protein_coding	-1.57985	5.75543	8.76378e-17	1.5031e-15	Down-regulated gene
EDN3|ENSG00000124205|protein_coding	-2.46001	3.02778	8.77905e-17	1.50382e-15	Down-regulated gene
PRPH|ENSG00000135406|protein_coding	-2.44949	0.0342474	8.78409e-17	1.50382e-15	Down-regulated gene
PAIP2B|ENSG00000124374|protein_coding	-1.64611	2.87973	8.88834e-17	1.52028e-15	Down-regulated gene
LGALS9B|ENSG00000170298|protein_coding	-2.55724	2.45383	9.15521e-17	1.56307e-15	Down-regulated gene
C2orf71|ENSG00000179270|protein_coding	-2.69049	-2.87399	9.55614e-17	1.63003e-15	Down-regulated gene
HTR7|ENSG00000148680|protein_coding	-1.81463	-0.747248	9.67927e-17	1.64953e-15	Down-regulated gene
STMN4|ENSG00000015592|protein_coding	-2.57851	-2.59752	9.78265e-17	1.66563e-15	Down-regulated gene
LNX1|ENSG00000072201|protein_coding	-1.24348	3.75897	9.84971e-17	1.67553e-15	Down-regulated gene
ID4|ENSG00000172201|protein_coding	-1.53981	3.91816	1.0736e-16	1.81803e-15	Down-regulated gene
KCNK7|ENSG00000173338|protein_coding	-1.77843	-0.11753	1.10127e-16	1.86151e-15	Down-regulated gene
PMP22|ENSG00000109099|protein_coding	-1.27884	6.25533	1.10907e-16	1.873e-15	Down-regulated gene
ADARB1|ENSG00000197381|protein_coding	-1.22632	4.5756	1.138e-16	1.92013e-15	Down-regulated gene
CPEB1|ENSG00000214575|protein_coding	-1.95491	0.554685	1.14302e-16	1.92687e-15	Down-regulated gene
ARMCX1|ENSG00000126947|protein_coding	-1.50205	2.97723	1.19291e-16	2.00735e-15	Down-regulated gene
RBM20|ENSG00000203867|protein_coding	-2.28303	0.659255	1.25103e-16	2.10137e-15	Down-regulated gene
PHOX2B|ENSG00000109132|protein_coding	-3.18824	-1.97596	1.30489e-16	2.18791e-15	Down-regulated gene
HSPB2|ENSG00000170276|protein_coding	-1.68609	-0.706248	1.31859e-16	2.2089e-15	Down-regulated gene
DSG1|ENSG00000134760|protein_coding	-3.50548	2.54056	1.35258e-16	2.26382e-15	Down-regulated gene
OPCML|ENSG00000183715|protein_coding	-2.05669	-0.480562	1.37217e-16	2.28841e-15	Down-regulated gene
PKP1|ENSG00000081277|protein_coding	-3.44053	5.80334	1.40289e-16	2.33757e-15	Down-regulated gene
EML1|ENSG00000066629|protein_coding	-1.65529	4.80322	1.42054e-16	2.36487e-15	Down-regulated gene
SLC46A2|ENSG00000119457|protein_coding	-1.94949	-1.71284	1.42894e-16	2.37675e-15	Down-regulated gene
C1QTNF4|ENSG00000172247|protein_coding	-1.93944	-0.338065	1.48165e-16	2.46004e-15	Down-regulated gene
MYOZ1|ENSG00000177791|protein_coding	-1.75261	-1.16322	1.49366e-16	2.47779e-15	Down-regulated gene
C2orf88|ENSG00000187699|protein_coding	-1.66695	3.49377	1.58717e-16	2.62824e-15	Down-regulated gene
ENPP6|ENSG00000164303|protein_coding	-1.96321	-0.14539	1.59136e-16	2.63284e-15	Down-regulated gene
P2RX2|ENSG00000187848|protein_coding	-2.56666	-0.625289	1.75664e-16	2.89606e-15	Down-regulated gene
BARX1|ENSG00000131668|protein_coding	-2.30303	5.43224	1.84585e-16	3.03778e-15	Down-regulated gene
MSANTD1|ENSG00000188981|protein_coding	-1.53245	-0.51647	2.00929e-16	3.29805e-15	Down-regulated gene
FERMT2|ENSG00000073712|protein_coding	-1.68032	6.1704	2.01318e-16	3.30155e-15	Down-regulated gene
FLNA|ENSG00000196924|protein_coding	-1.93874	11.3162	2.05279e-16	3.36355e-15	Down-regulated gene
PRICKLE2|ENSG00000163637|protein_coding	-1.78982	4.40855	2.07509e-16	3.39713e-15	Down-regulated gene
ALKAL2|ENSG00000189292|protein_coding	-1.77343	-0.683105	2.12728e-16	3.47952e-15	Down-regulated gene
MXRA7|ENSG00000182534|protein_coding	-1.48492	6.49701	2.19146e-16	3.58137e-15	Down-regulated gene
ACKR3|ENSG00000144476|protein_coding	-1.26212	4.48614	2.19619e-16	3.58596e-15	Down-regulated gene
KCTD11|ENSG00000213859|protein_coding	-1.0537	4.0499	2.24268e-16	3.6555e-15	Down-regulated gene
ANKS1B|ENSG00000185046|protein_coding	-2.0455	0.768176	2.4323e-16	3.95767e-15	Down-regulated gene
NDN|ENSG00000182636|protein_coding	-1.55138	4.1287	2.44539e-16	3.97551e-15	Down-regulated gene
CD79A|ENSG00000105369|protein_coding	-2.41589	5.77233	2.52675e-16	4.10066e-15	Down-regulated gene
FAM110D|ENSG00000197245|protein_coding	-1.4493	1.1844	2.54535e-16	4.12368e-15	Down-regulated gene
RAB9B|ENSG00000123570|protein_coding	-1.90621	1.66607	2.88389e-16	4.65602e-15	Down-regulated gene
TAGLN|ENSG00000149591|protein_coding	-2.13429	9.16992	2.93704e-16	4.73366e-15	Down-regulated gene
UBE2QL1|ENSG00000215218|protein_coding	-2.01327	1.29211	2.94349e-16	4.73998e-15	Down-regulated gene
ZCWPW2|ENSG00000206559|protein_coding	-1.26002	-0.323942	3.11479e-16	5.00291e-15	Down-regulated gene
TMPRSS11B|ENSG00000185873|protein_coding	-5.03493	4.15015	3.12738e-16	5.01883e-15	Down-regulated gene
SORBS1|ENSG00000095637|protein_coding	-2.11463	7.67986	3.41313e-16	5.46334e-15	Down-regulated gene
FBXL7|ENSG00000183580|protein_coding	-1.41336	3.96488	3.82163e-16	6.08082e-15	Down-regulated gene
SMIM24|ENSG00000095932|protein_coding	-2.1889	6.65183	3.95676e-16	6.2798e-15	Down-regulated gene
MAOA|ENSG00000189221|protein_coding	-1.58182	6.3316	4.08695e-16	6.46997e-15	Down-regulated gene
PLIN5|ENSG00000214456|protein_coding	-1.77291	0.697132	4.12539e-16	6.52529e-15	Down-regulated gene
PDE5A|ENSG00000138735|protein_coding	-1.4063	5.50548	4.92912e-16	7.76377e-15	Down-regulated gene
PPP1R3G|ENSG00000219607|protein_coding	-1.64481	1.36475	4.99983e-16	7.86852e-15	Down-regulated gene
ENHO|ENSG00000168913|protein_coding	-2.09695	-0.442931	5.12098e-16	8.04906e-15	Down-regulated gene
LDHD|ENSG00000166816|protein_coding	-1.72802	3.75528	5.12315e-16	8.04906e-15	Down-regulated gene
HIPK4|ENSG00000160396|protein_coding	-1.68507	-1.66058	5.25554e-16	8.25014e-15	Down-regulated gene
RBP7|ENSG00000162444|protein_coding	-1.58852	1.172	5.36093e-16	8.39445e-15	Down-regulated gene
DIXDC1|ENSG00000150764|protein_coding	-1.62281	5.10598	5.53092e-16	8.65339e-15	Down-regulated gene
VIP|ENSG00000146469|protein_coding	-2.97179	2.63364	5.58358e-16	8.7212e-15	Down-regulated gene
CNRIP1|ENSG00000119865|protein_coding	-1.29831	3.26374	5.59712e-16	8.73505e-15	Down-regulated gene
ADRA1A|ENSG00000120907|protein_coding	-1.82665	-1.1232	5.84546e-16	9.11502e-15	Down-regulated gene
ACADSB|ENSG00000196177|protein_coding	-1.03146	4.85744	6.13369e-16	9.54855e-15	Down-regulated gene
MYMX|ENSG00000262179|protein_coding	-1.86998	-0.887993	6.20061e-16	9.6447e-15	Down-regulated gene
SLC13A2|ENSG00000007216|protein_coding	-3.17541	4.08533	6.28046e-16	9.7608e-15	Down-regulated gene
C16orf86|ENSG00000159761|protein_coding	-1.14104	0.15601	6.56995e-16	1.02022e-14	Down-regulated gene
HSPB6|ENSG00000004776|protein_coding	-2.69336	7.80956	6.64968e-16	1.03175e-14	Down-regulated gene
MYO1A|ENSG00000166866|protein_coding	-2.10537	5.75957	6.69458e-16	1.03785e-14	Down-regulated gene
PRKAR2B|ENSG00000005249|protein_coding	-1.65275	4.08721	6.80064e-16	1.05255e-14	Down-regulated gene
TLE4|ENSG00000106829|protein_coding	-1.0698	4.69171	6.86593e-16	1.0609e-14	Down-regulated gene
PRNP|ENSG00000171867|protein_coding	-1.26893	6.94096	6.93722e-16	1.06927e-14	Down-regulated gene
MAFF|ENSG00000185022|protein_coding	-1.07131	5.26975	7.26075e-16	1.11638e-14	Down-regulated gene
GNAO1|ENSG00000087258|protein_coding	-2.18888	4.65171	7.33168e-16	1.12543e-14	Down-regulated gene
BEND5|ENSG00000162373|protein_coding	-1.85992	0.883466	7.41028e-16	1.13657e-14	Down-regulated gene
LCN6|ENSG00000267206|protein_coding	-2.06261	-1.89945	7.66502e-16	1.17468e-14	Down-regulated gene
MAGI2|ENSG00000187391|protein_coding	-1.484	2.44298	7.69482e-16	1.17828e-14	Down-regulated gene
MAST4|ENSG00000069020|protein_coding	-1.20323	5.65646	8.00871e-16	1.22234e-14	Down-regulated gene
TRIM74|ENSG00000155428|protein_coding	-1.6832	-2.39018	8.06213e-16	1.22849e-14	Down-regulated gene
MSRB3|ENSG00000174099|protein_coding	-1.8771	5.7654	8.2438e-16	1.25515e-14	Down-regulated gene
FRZB|ENSG00000162998|protein_coding	-1.8534	4.96792	8.39083e-16	1.2765e-14	Down-regulated gene
FAM212A|ENSG00000185614|protein_coding	-1.322	0.544743	8.77335e-16	1.32821e-14	Down-regulated gene
DACT3|ENSG00000197380|protein_coding	-1.97527	4.27078	8.88248e-16	1.34365e-14	Down-regulated gene
RHCG|ENSG00000140519|protein_coding	-3.93564	7.61794	9.97126e-16	1.50348e-14	Down-regulated gene
MUC22|ENSG00000261272|protein_coding	-4.00984	1.6712	1.0194e-15	1.53583e-14	Down-regulated gene
PLA2G4D|ENSG00000159337|protein_coding	-2.28746	0.00422574	1.04096e-15	1.56579e-14	Down-regulated gene
GFRA1|ENSG00000151892|protein_coding	-2.2562	4.3611	1.0635e-15	1.59842e-14	Down-regulated gene
AOC3|ENSG00000131471|protein_coding	-1.90457	6.11002	1.1412e-15	1.71244e-14	Down-regulated gene
C22orf23|ENSG00000128346|protein_coding	-1.53616	0.0560772	1.1532e-15	1.72906e-14	Down-regulated gene
ZBTB47|ENSG00000114853|protein_coding	-1.19334	4.434	1.16929e-15	1.74898e-14	Down-regulated gene
LURAP1|ENSG00000171357|protein_coding	-1.48382	-0.0628858	1.21023e-15	1.80732e-14	Down-regulated gene
XDH|ENSG00000158125|protein_coding	-2.03345	4.58461	1.21251e-15	1.80929e-14	Down-regulated gene
CRABP2|ENSG00000143320|protein_coding	-2.4336	5.01589	1.28034e-15	1.90443e-14	Down-regulated gene
CDON|ENSG00000064309|protein_coding	-1.73363	3.79536	1.33204e-15	1.97505e-14	Down-regulated gene
RAET1G|ENSG00000203722|protein_coding	-2.0957	0.163042	1.34648e-15	1.99488e-14	Down-regulated gene
CHADL|ENSG00000100399|protein_coding	-1.41239	1.53696	1.38714e-15	2.05187e-14	Down-regulated gene
OAT|ENSG00000065154|protein_coding	-1.30936	6.99301	1.44579e-15	2.13694e-14	Down-regulated gene
ITPKB|ENSG00000143772|protein_coding	-1.46933	6.00267	1.52479e-15	2.25015e-14	Down-regulated gene
B3GALT4|ENSG00000235863|protein_coding	-1.03178	3.41137	1.59658e-15	2.35053e-14	Down-regulated gene
ATP2B4|ENSG00000058668|protein_coding	-1.51619	7.78721	1.66695e-15	2.44643e-14	Down-regulated gene
CYP11A1|ENSG00000140459|protein_coding	-2.04415	-0.367942	1.69294e-15	2.48262e-14	Down-regulated gene
SV2C|ENSG00000122012|protein_coding	-2.10704	0.184116	1.70244e-15	2.4946e-14	Down-regulated gene
MEIS1|ENSG00000143995|protein_coding	-1.50494	4.72499	1.71582e-15	2.51224e-14	Down-regulated gene
SPRR3|ENSG00000163209|protein_coding	-4.4707	8.8912	1.85771e-15	2.70939e-14	Down-regulated gene
HACD1|ENSG00000165996|protein_coding	-1.83055	2.19815	1.89772e-15	2.76344e-14	Down-regulated gene
S100A14|ENSG00000189334|protein_coding	-1.97555	7.32088	1.91388e-15	2.7848e-14	Down-regulated gene
ZSCAN18|ENSG00000121413|protein_coding	-1.63046	3.65812	1.95777e-15	2.84424e-14	Down-regulated gene
SLC9A9|ENSG00000181804|protein_coding	-1.41609	2.88402	2.00631e-15	2.9109e-14	Down-regulated gene
NCS1|ENSG00000107130|protein_coding	-1.71788	5.51804	2.0387e-15	2.95493e-14	Down-regulated gene
SH3BGRL|ENSG00000131171|protein_coding	-1.16125	7.11021	2.1245e-15	3.07216e-14	Down-regulated gene
ENAM|ENSG00000132464|protein_coding	-2.07499	0.421412	2.19063e-15	3.16288e-14	Down-regulated gene
BCHE|ENSG00000114200|protein_coding	-2.46238	2.16203	2.24177e-15	3.22964e-14	Down-regulated gene
DMGDH|ENSG00000132837|protein_coding	-1.48704	-0.194047	2.24363e-15	3.22964e-14	Down-regulated gene
DUSP19|ENSG00000162999|protein_coding	-1.06395	2.51304	2.29062e-15	3.29455e-14	Down-regulated gene
ASB2|ENSG00000100628|protein_coding	-2.07492	4.17768	2.31016e-15	3.3201e-14	Down-regulated gene
TP63|ENSG00000073282|protein_coding	-2.81471	3.24883	2.34305e-15	3.36234e-14	Down-regulated gene
EDN2|ENSG00000127129|protein_coding	-2.40158	0.690463	2.46829e-15	3.5338e-14	Down-regulated gene
SSR4|ENSG00000180879|protein_coding	-1.08233	7.69814	2.55004e-15	3.64247e-14	Down-regulated gene
CAMK2G|ENSG00000148660|protein_coding	-1.00149	5.97787	2.64307e-15	3.76673e-14	Down-regulated gene
TGM5|ENSG00000104055|protein_coding	-3.26742	-0.361165	2.73531e-15	3.89226e-14	Down-regulated gene
SH3GL2|ENSG00000107295|protein_coding	-2.69874	-0.301797	2.82134e-15	3.99955e-14	Down-regulated gene
ZNF471|ENSG00000196263|protein_coding	-1.67135	1.61082	2.8214e-15	3.99955e-14	Down-regulated gene
RPS6KA5|ENSG00000100784|protein_coding	-1.00687	4.29761	2.90908e-15	4.11449e-14	Down-regulated gene
NCALD|ENSG00000104490|protein_coding	-1.35923	3.82291	2.9981e-15	4.22762e-14	Down-regulated gene
TCEAL2|ENSG00000184905|protein_coding	-2.75691	2.43789	3.01212e-15	4.24419e-14	Down-regulated gene
PBX1|ENSG00000185630|protein_coding	-1.33134	6.20324	3.09752e-15	4.35796e-14	Down-regulated gene
CCDC13|ENSG00000244607|protein_coding	-1.17733	-0.851233	3.14439e-15	4.42057e-14	Down-regulated gene
MYL4|ENSG00000198336|protein_coding	-1.64489	-1.23029	3.37576e-15	4.72809e-14	Down-regulated gene
DUOX1|ENSG00000137857|protein_coding	-2.08555	4.828	3.51619e-15	4.9149e-14	Down-regulated gene
NNAT|ENSG00000053438|protein_coding	-2.14991	2.62102	3.56889e-15	4.98366e-14	Down-regulated gene
ADH1B|ENSG00000196616|protein_coding	-2.47734	5.05395	3.62246e-15	5.05093e-14	Down-regulated gene
NPTX1|ENSG00000171246|protein_coding	-2.73489	3.34642	3.66954e-15	5.11277e-14	Down-regulated gene
SLC25A23|ENSG00000125648|protein_coding	-1.04566	6.78465	4.01101e-15	5.58022e-14	Down-regulated gene
LIX1|ENSG00000145721|protein_coding	-2.53521	-0.526625	4.01705e-15	5.58033e-14	Down-regulated gene
CYP2C18|ENSG00000108242|protein_coding	-2.04649	4.2638	4.22468e-15	5.86007e-14	Down-regulated gene
SPEG|ENSG00000072195|protein_coding	-2.21221	5.1599	4.60462e-15	6.3729e-14	Down-regulated gene
KLHDC8A|ENSG00000162873|protein_coding	-1.44748	0.929054	4.63332e-15	6.40789e-14	Down-regulated gene
CCR10|ENSG00000184451|protein_coding	-1.45282	1.01135	4.67872e-15	6.46112e-14	Down-regulated gene
UNC5D|ENSG00000156687|protein_coding	-2.54569	-0.476437	4.69697e-15	6.48154e-14	Down-regulated gene
FADS6|ENSG00000172782|protein_coding	-2.77312	0.856608	4.75004e-15	6.54994e-14	Down-regulated gene
OLFM3|ENSG00000118733|protein_coding	-2.91714	-2.72781	4.75605e-15	6.5534e-14	Down-regulated gene
GPRASP2|ENSG00000158301|protein_coding	-1.2188	2.41961	4.78635e-15	6.5903e-14	Down-regulated gene
RANBP3L|ENSG00000164188|protein_coding	-1.92057	-0.894256	4.83317e-15	6.64499e-14	Down-regulated gene
GRIK5|ENSG00000105737|protein_coding	-2.06274	2.42754	4.90232e-15	6.73017e-14	Down-regulated gene
GRIK3|ENSG00000163873|protein_coding	-2.49698	1.52533	4.93625e-15	6.77178e-14	Down-regulated gene
CXCR2|ENSG00000180871|protein_coding	-2.15808	2.22127	5.03692e-15	6.89472e-14	Down-regulated gene
RNF165|ENSG00000141622|protein_coding	-1.86318	0.414032	5.23457e-15	7.16003e-14	Down-regulated gene
TMEM8B|ENSG00000137103|protein_coding	-1.04371	4.14864	5.33456e-15	7.28616e-14	Down-regulated gene
IRF4|ENSG00000137265|protein_coding	-1.82406	3.52462	5.36453e-15	7.32175e-14	Down-regulated gene
PHLPP2|ENSG00000040199|protein_coding	-1.13512	3.93199	5.51323e-15	7.50826e-14	Down-regulated gene
PPM1K|ENSG00000163644|protein_coding	-1.09258	4.39412	5.853e-15	7.95718e-14	Down-regulated gene
ATOH8|ENSG00000168874|protein_coding	-1.7112	2.41928	5.85562e-15	7.95718e-14	Down-regulated gene
BPIFB2|ENSG00000078898|protein_coding	-4.66977	5.05253	5.87705e-15	7.9805e-14	Down-regulated gene
FAM83C|ENSG00000125998|protein_coding	-3.44771	1.20567	6.05353e-15	8.21418e-14	Down-regulated gene
CLIP4|ENSG00000115295|protein_coding	-1.44163	4.05009	6.14409e-15	8.33103e-14	Down-regulated gene
ADCY5|ENSG00000173175|protein_coding	-2.11714	4.99616	6.4359e-15	8.72039e-14	Down-regulated gene
DYNAP|ENSG00000178690|protein_coding	-4.32339	0.529933	6.47016e-15	8.76047e-14	Down-regulated gene
MAB21L1|ENSG00000180660|protein_coding	-2.07078	-1.31397	6.5192e-15	8.81411e-14	Down-regulated gene
TMEM238L|ENSG00000263429|protein_coding	-2.09309	3.83982	7.00743e-15	9.42652e-14	Down-regulated gene
ANTXR2|ENSG00000163297|protein_coding	-1.39719	6.48588	7.04339e-15	9.4681e-14	Down-regulated gene
FGF2|ENSG00000138685|protein_coding	-1.80227	3.31083	7.15346e-15	9.60915e-14	Down-regulated gene
HSPB3|ENSG00000169271|protein_coding	-3.08455	-1.80913	7.45707e-15	1.00098e-13	Down-regulated gene
FYCO1|ENSG00000163820|protein_coding	-1.10725	6.31831	7.47774e-15	1.00304e-13	Down-regulated gene
CDHR2|ENSG00000074276|protein_coding	-2.2311	6.08992	7.75805e-15	1.0384e-13	Down-regulated gene
ME1|ENSG00000065833|protein_coding	-1.3205	4.94841	7.86074e-15	1.05064e-13	Down-regulated gene
CALY|ENSG00000130643|protein_coding	-2.44713	-0.0529995	7.97741e-15	1.06548e-13	Down-regulated gene
ATCAY|ENSG00000167654|protein_coding	-2.10418	-1.05167	8.73341e-15	1.16151e-13	Down-regulated gene
MRGPRF|ENSG00000172935|protein_coding	-2.00421	5.01797	9.55694e-15	1.26739e-13	Down-regulated gene
MYH11|ENSG00000133392|protein_coding	-2.68337	11.4592	9.68928e-15	1.28131e-13	Down-regulated gene
SMIM10L2B|ENSG00000196972|protein_coding	-1.51306	0.141839	1.06221e-14	1.4017e-13	Down-regulated gene
ATG9B|ENSG00000181652|protein_coding	-1.76598	2.55841	1.06556e-14	1.40513e-13	Down-regulated gene
GJB6|ENSG00000121742|protein_coding	-3.2387	3.10789	1.07168e-14	1.41221e-13	Down-regulated gene
TMEM82|ENSG00000162460|protein_coding	-2.29533	2.05789	1.0748e-14	1.41433e-13	Down-regulated gene
EPHX2|ENSG00000120915|protein_coding	-1.37306	5.03232	1.11816e-14	1.47034e-13	Down-regulated gene
PDLIM4|ENSG00000131435|protein_coding	-1.48559	4.55287	1.1213e-14	1.47344e-13	Down-regulated gene
FABP12|ENSG00000197416|protein_coding	-3.38269	-3.57797	1.12556e-14	1.47697e-13	Down-regulated gene
CACNA1H|ENSG00000196557|protein_coding	-1.81538	6.12119	1.16516e-14	1.52465e-13	Down-regulated gene
ARSF|ENSG00000062096|protein_coding	-2.75313	-1.81491	1.22428e-14	1.59754e-13	Down-regulated gene
TP53I3|ENSG00000115129|protein_coding	-1.04049	4.45267	1.2256e-14	1.59815e-13	Down-regulated gene
GDF7|ENSG00000143869|protein_coding	-1.8191	1.05838	1.2602e-14	1.64098e-13	Down-regulated gene
TNS2|ENSG00000111077|protein_coding	-1.21036	6.42732	1.28992e-14	1.67619e-13	Down-regulated gene
GSG1L|ENSG00000169181|protein_coding	-1.93398	-2.49902	1.29443e-14	1.68087e-13	Down-regulated gene
POPDC2|ENSG00000121577|protein_coding	-2.07155	3.03422	1.29692e-14	1.68293e-13	Down-regulated gene
MICU3|ENSG00000155970|protein_coding	-1.5479	1.53779	1.30169e-14	1.68795e-13	Down-regulated gene
GPRASP1|ENSG00000198932|protein_coding	-1.7049	3.05354	1.37027e-14	1.77197e-13	Down-regulated gene
RAET1L|ENSG00000155918|protein_coding	-2.60361	1.13121	1.39298e-14	1.79637e-13	Down-regulated gene
KRT13|ENSG00000171401|protein_coding	-4.2685	9.57571	1.43095e-14	1.8428e-13	Down-regulated gene
SOCS3|ENSG00000184557|protein_coding	-1.2348	6.81409	1.59753e-14	2.04746e-13	Down-regulated gene
RADIL|ENSG00000157927|protein_coding	-1.70931	0.914839	1.65679e-14	2.11762e-13	Down-regulated gene
GRPR|ENSG00000126010|protein_coding	-2.39897	0.227143	1.71734e-14	2.19051e-13	Down-regulated gene
DCN|ENSG00000011465|protein_coding	-1.50871	8.67142	1.72425e-14	2.19783e-13	Down-regulated gene
SPINK8|ENSG00000229453|protein_coding	-3.41548	-3.23757	1.73786e-14	2.21066e-13	Down-regulated gene
NEXN|ENSG00000162614|protein_coding	-1.89159	5.683	1.77656e-14	2.25682e-13	Down-regulated gene
RORA|ENSG00000069667|protein_coding	-1.20267	4.21435	1.78236e-14	2.26266e-13	Down-regulated gene
GALR1|ENSG00000166573|protein_coding	-2.39544	-2.06474	1.78463e-14	2.264e-13	Down-regulated gene
DUSP26|ENSG00000133878|protein_coding	-1.97085	0.170901	1.79769e-14	2.27902e-13	Down-regulated gene
NRP2|ENSG00000118257|protein_coding	-1.50293	6.29608	1.86672e-14	2.36334e-13	Down-regulated gene
ADGRB3|ENSG00000135298|protein_coding	-2.17354	0.34128	2.04454e-14	2.58497e-13	Down-regulated gene
COPZ2|ENSG00000005243|protein_coding	-1.41577	3.06637	2.13746e-14	2.69697e-13	Down-regulated gene
PHYHIP|ENSG00000168490|protein_coding	-1.5785	1.3662	2.1585e-14	2.72114e-13	Down-regulated gene
RNF112|ENSG00000128482|protein_coding	-1.47697	-0.641506	2.44547e-14	3.06289e-13	Down-regulated gene
MAOB|ENSG00000069535|protein_coding	-1.80876	5.1381	2.66595e-14	3.32347e-13	Down-regulated gene
MYOZ2|ENSG00000172399|protein_coding	-2.19212	-2.06587	2.67412e-14	3.33143e-13	Down-regulated gene
ACOT11|ENSG00000162390|protein_coding	-1.08769	4.80883	2.76303e-14	3.43762e-13	Down-regulated gene
ANKRD37|ENSG00000186352|protein_coding	-1.37411	2.06437	2.76827e-14	3.44185e-13	Down-regulated gene
KLRB1|ENSG00000111796|protein_coding	-1.53285	2.25755	2.85079e-14	3.53877e-13	Down-regulated gene
TSPAN2|ENSG00000134198|protein_coding	-1.74895	4.19548	2.85261e-14	3.53877e-13	Down-regulated gene
SOBP|ENSG00000112320|protein_coding	-1.5723	3.93366	2.85379e-14	3.53877e-13	Down-regulated gene
CABP7|ENSG00000100314|protein_coding	-1.60829	-0.956073	2.95651e-14	3.66129e-13	Down-regulated gene
ACTA2|ENSG00000107796|protein_coding	-1.79238	9.00257	2.95932e-14	3.66236e-13	Down-regulated gene
RECK|ENSG00000122707|protein_coding	-1.27011	3.55803	2.96474e-14	3.66664e-13	Down-regulated gene
TTC22|ENSG00000006555|protein_coding	-1.39964	5.57859	2.99816e-14	3.70552e-13	Down-regulated gene
PRAP1|ENSG00000165828|protein_coding	-2.49681	6.15337	3.08145e-14	3.80344e-13	Down-regulated gene
TMPRSS11D|ENSG00000153802|protein_coding	-3.65837	2.67712	3.09908e-14	3.82267e-13	Down-regulated gene
SYNM|ENSG00000182253|protein_coding	-2.59818	8.0719	3.37858e-14	4.15374e-13	Down-regulated gene
NDUFA4L2|ENSG00000185633|protein_coding	-1.56402	4.88414	3.48327e-14	4.27403e-13	Down-regulated gene
MLLT11|ENSG00000213190|protein_coding	-1.44177	3.49167	3.52523e-14	4.31985e-13	Down-regulated gene
ANK2|ENSG00000145362|protein_coding	-1.88995	4.41062	3.84309e-14	4.69093e-13	Down-regulated gene
KCNA1|ENSG00000111262|protein_coding	-3.12028	1.06282	4.05953e-14	4.94221e-13	Down-regulated gene
CA14|ENSG00000118298|protein_coding	-1.3938	0.841662	4.09877e-14	4.98675e-13	Down-regulated gene
BVES|ENSG00000112276|protein_coding	-1.89879	3.5542	4.11423e-14	5.00061e-13	Down-regulated gene
SLURP1|ENSG00000126233|protein_coding	-4.26067	3.26415	4.11551e-14	5.00061e-13	Down-regulated gene
CYP1A1|ENSG00000140465|protein_coding	-3.04507	-0.0782441	4.15842e-14	5.04947e-13	Down-regulated gene
WSCD2|ENSG00000075035|protein_coding	-2.41552	2.45436	4.23374e-14	5.13759e-13	Down-regulated gene
CALD1|ENSG00000122786|protein_coding	-1.7277	9.58074	4.24035e-14	5.13895e-13	Down-regulated gene
RTL5|ENSG00000242732|protein_coding	-1.53776	2.67885	4.41366e-14	5.34207e-13	Down-regulated gene
MYRIP|ENSG00000170011|protein_coding	-1.77653	2.20991	4.69788e-14	5.66774e-13	Down-regulated gene
C9orf47|ENSG00000186354|protein_coding	-1.74577	-0.716546	4.70681e-14	5.67486e-13	Down-regulated gene
SCGB2A1|ENSG00000124939|protein_coding	-2.86842	1.1921	4.82529e-14	5.81022e-13	Down-regulated gene
DUOXA1|ENSG00000140254|protein_coding	-2.32014	2.70287	4.90861e-14	5.88782e-13	Down-regulated gene
APOBEC2|ENSG00000124701|protein_coding	-2.03803	0.934885	5.07666e-14	6.0816e-13	Down-regulated gene
ATP12A|ENSG00000075673|protein_coding	-3.09314	0.270612	5.13877e-14	6.14813e-13	Down-regulated gene
ADAMTSL3|ENSG00000156218|protein_coding	-1.77513	3.21547	5.15436e-14	6.1589e-13	Down-regulated gene
COL23A1|ENSG00000050767|protein_coding	-1.53836	1.51225	5.23914e-14	6.2562e-13	Down-regulated gene
NR4A1|ENSG00000123358|protein_coding	-1.57176	7.18828	5.26975e-14	6.28875e-13	Down-regulated gene
BARX2|ENSG00000043039|protein_coding	-1.90354	4.04704	5.68172e-14	6.77605e-13	Down-regulated gene
SERPINB12|ENSG00000166634|protein_coding	-3.94639	-1.73131	5.75175e-14	6.85521e-13	Down-regulated gene
MORN5|ENSG00000185681|protein_coding	-2.93247	0.341868	5.9771e-14	7.11472e-13	Down-regulated gene
APBB1|ENSG00000166313|protein_coding	-1.39528	4.04196	6.04821e-14	7.19479e-13	Down-regulated gene
POU6F1|ENSG00000184271|protein_coding	-1.18525	2.94113	6.45581e-14	7.63597e-13	Down-regulated gene
TFF2|ENSG00000160181|protein_coding	-2.88443	8.29198	6.57013e-14	7.76531e-13	Down-regulated gene
ART3|ENSG00000156219|protein_coding	-2.0628	-0.112215	7.07475e-14	8.33644e-13	Down-regulated gene
IL17B|ENSG00000127743|protein_coding	-1.4593	-1.46244	7.66708e-14	8.99475e-13	Down-regulated gene
JAM3|ENSG00000166086|protein_coding	-1.35752	4.99956	8.51615e-14	9.941e-13	Down-regulated gene
SLC27A6|ENSG00000113396|protein_coding	-2.32011	-0.566821	8.85788e-14	1.0327e-12	Down-regulated gene
NMBR|ENSG00000135577|protein_coding	-2.19601	-3.36827	8.92913e-14	1.04036e-12	Down-regulated gene
LTF|ENSG00000012223|protein_coding	-2.6727	7.19264	9.5986e-14	1.11697e-12	Down-regulated gene
CLDN5|ENSG00000184113|protein_coding	-1.46759	4.29008	9.79459e-14	1.13839e-12	Down-regulated gene
ASPG|ENSG00000166183|protein_coding	-2.16819	1.27587	9.79481e-14	1.13839e-12	Down-regulated gene
VSIR|ENSG00000107738|protein_coding	-1.01422	6.22196	9.87186e-14	1.14592e-12	Down-regulated gene
KCNJ15|ENSG00000157551|protein_coding	-2.07909	3.67586	1.0023e-13	1.16274e-12	Down-regulated gene
PALLD|ENSG00000129116|protein_coding	-1.46874	8.19345	1.02177e-13	1.18459e-12	Down-regulated gene
NGB|ENSG00000165553|protein_coding	-3.28721	-1.63907	1.03196e-13	1.19567e-12	Down-regulated gene
RILP|ENSG00000167705|protein_coding	-1.0217	3.95339	1.06393e-13	1.23119e-12	Down-regulated gene
CDHR3|ENSG00000128536|protein_coding	-1.24686	2.47088	1.09635e-13	1.26737e-12	Down-regulated gene
DSC2|ENSG00000134755|protein_coding	-1.72335	6.79257	1.09656e-13	1.26737e-12	Down-regulated gene
FAHD2B|ENSG00000144199|protein_coding	-1.09777	2.27706	1.15762e-13	1.33382e-12	Down-regulated gene
FAM46C|ENSG00000183508|protein_coding	-1.43278	5.25695	1.23584e-13	1.42133e-12	Down-regulated gene
NME5|ENSG00000112981|protein_coding	-1.63515	-0.0762126	1.26381e-13	1.45171e-12	Down-regulated gene
NLRP6|ENSG00000174885|protein_coding	-2.31913	2.89989	1.26665e-13	1.45408e-12	Down-regulated gene
ANPEP|ENSG00000166825|protein_coding	-2.55707	9.57425	1.29894e-13	1.48842e-12	Down-regulated gene
ATP2B2|ENSG00000157087|protein_coding	-2.14535	-0.741419	1.32952e-13	1.52159e-12	Down-regulated gene
SOCS2|ENSG00000120833|protein_coding	-1.09552	4.08763	1.43472e-13	1.63798e-12	Down-regulated gene
CROT|ENSG00000005469|protein_coding	-1.16243	3.79519	1.43596e-13	1.6384e-12	Down-regulated gene
AR|ENSG00000169083|protein_coding	-1.76613	2.39674	1.46345e-13	1.66875e-12	Down-regulated gene
LHPP|ENSG00000107902|protein_coding	-1.06102	4.71562	1.56323e-13	1.77603e-12	Down-regulated gene
JPH2|ENSG00000149596|protein_coding	-2.16301	4.82792	1.56619e-13	1.77831e-12	Down-regulated gene
DSP|ENSG00000096696|protein_coding	-1.37391	9.0917	1.61145e-13	1.82859e-12	Down-regulated gene
PKHD1L1|ENSG00000205038|protein_coding	-1.81585	0.519552	1.63436e-13	1.85234e-12	Down-regulated gene
CSPG4|ENSG00000173546|protein_coding	-1.58401	6.18422	1.65137e-13	1.87049e-12	Down-regulated gene
NEXMIF|ENSG00000050030|protein_coding	-2.10817	0.703793	1.65711e-13	1.87585e-12	Down-regulated gene
CLTB|ENSG00000175416|protein_coding	-1.01709	7.03165	1.71937e-13	1.94398e-12	Down-regulated gene
CHRM2|ENSG00000181072|protein_coding	-2.80885	3.37712	1.77824e-13	2.00811e-12	Down-regulated gene
PRRT1|ENSG00000204314|protein_coding	-1.24585	2.32708	1.81417e-13	2.04621e-12	Down-regulated gene
RASL12|ENSG00000103710|protein_coding	-1.28069	3.69996	1.8677e-13	2.10405e-12	Down-regulated gene
IKZF2|ENSG00000030419|protein_coding	-1.3958	3.68463	1.94641e-13	2.18746e-12	Down-regulated gene
OTC|ENSG00000036473|protein_coding	-2.82104	2.8454	1.99116e-13	2.23641e-12	Down-regulated gene
MFAP4|ENSG00000166482|protein_coding	-1.71519	7.38126	2.00908e-13	2.25383e-12	Down-regulated gene
FILIP1|ENSG00000118407|protein_coding	-1.80126	4.25344	2.15418e-13	2.40795e-12	Down-regulated gene
CRNN|ENSG00000143536|protein_coding	-5.34517	7.63347	2.1617e-13	2.41491e-12	Down-regulated gene
CNTNAP3|ENSG00000106714|protein_coding	-1.81909	0.900752	2.20621e-13	2.45877e-12	Down-regulated gene
TCF7L1|ENSG00000152284|protein_coding	-1.29207	3.96975	2.34121e-13	2.60611e-12	Down-regulated gene
ASB16|ENSG00000161664|protein_coding	-1.17219	0.471267	2.34307e-13	2.60663e-12	Down-regulated gene
KIT|ENSG00000157404|protein_coding	-1.58451	4.10522	2.35346e-13	2.61507e-12	Down-regulated gene
DYNC1I1|ENSG00000158560|protein_coding	-1.77451	2.04406	2.37178e-13	2.63231e-12	Down-regulated gene
RBM24|ENSG00000112183|protein_coding	-1.94792	1.2645	2.45148e-13	2.71755e-12	Down-regulated gene
GNA15|ENSG00000060558|protein_coding	-1.48315	3.83019	2.49658e-13	2.76589e-12	Down-regulated gene
MPP7|ENSG00000150054|protein_coding	-1.41629	5.17911	2.53376e-13	2.80211e-12	Down-regulated gene
FOXP2|ENSG00000128573|protein_coding	-2.00026	3.7421	2.5683e-13	2.83528e-12	Down-regulated gene
FGFBP2|ENSG00000137441|protein_coding	-1.55547	-0.854007	2.73778e-13	3.01882e-12	Down-regulated gene
SMPX|ENSG00000091482|protein_coding	-3.02453	1.64352	2.74212e-13	3.02182e-12	Down-regulated gene
NIPSNAP3B|ENSG00000165028|protein_coding	-1.33231	0.380902	2.83465e-13	3.1192e-12	Down-regulated gene
RHOJ|ENSG00000126785|protein_coding	-1.23538	4.15612	2.83548e-13	3.1192e-12	Down-regulated gene
BTBD11|ENSG00000151136|protein_coding	-1.97361	2.96833	2.86632e-13	3.14941e-12	Down-regulated gene
GCOM1|ENSG00000137878|protein_coding	-1.5628	0.396903	2.90341e-13	3.18456e-12	Down-regulated gene
AC135586.2|ENSG00000256632|protein_coding	-1.88666	-4.05244	2.9698e-13	3.25166e-12	Down-regulated gene
HSD17B2|ENSG00000086696|protein_coding	-1.89437	5.6782	2.9897e-13	3.26962e-12	Down-regulated gene
GLRX|ENSG00000173221|protein_coding	-1.10728	5.1347	3.15601e-13	3.43944e-12	Down-regulated gene
REEP1|ENSG00000068615|protein_coding	-1.84441	3.38268	3.19687e-13	3.48194e-12	Down-regulated gene
MYLK|ENSG00000065534|protein_coding	-2.02918	8.94634	3.2086e-13	3.49269e-12	Down-regulated gene
LONRF2|ENSG00000170500|protein_coding	-2.04241	3.16173	3.36307e-13	3.65234e-12	Down-regulated gene
TRPC4|ENSG00000133107|protein_coding	-1.68869	1.28547	3.44413e-13	3.7382e-12	Down-regulated gene
DSG3|ENSG00000134757|protein_coding	-3.05384	5.99309	3.44872e-13	3.74101e-12	Down-regulated gene
TNS1|ENSG00000079308|protein_coding	-1.75546	8.86878	3.49589e-13	3.77904e-12	Down-regulated gene
ABAT|ENSG00000183044|protein_coding	-1.3614	4.55182	3.59729e-13	3.88416e-12	Down-regulated gene
PPP2R3A|ENSG00000073711|protein_coding	-1.29115	4.0909	3.6298e-13	3.917e-12	Down-regulated gene
GALNT15|ENSG00000131386|protein_coding	-1.67431	2.57651	3.95167e-13	4.24232e-12	Down-regulated gene
CHP2|ENSG00000166869|protein_coding	-2.81712	3.80077	4.03843e-13	4.32802e-12	Down-regulated gene
UGT2B17|ENSG00000197888|protein_coding	-3.31337	2.78759	4.20424e-13	4.49284e-12	Down-regulated gene
KRT32|ENSG00000108759|protein_coding	-3.45578	-1.89985	4.37948e-13	4.67478e-12	Down-regulated gene
HTR1E|ENSG00000168830|protein_coding	-3.07893	-2.67923	4.4367e-13	4.73046e-12	Down-regulated gene
HAND2|ENSG00000164107|protein_coding	-2.55543	4.47348	4.50798e-13	4.79552e-12	Down-regulated gene
CPED1|ENSG00000106034|protein_coding	-1.75113	5.17105	4.69056e-13	4.97818e-12	Down-regulated gene
C16orf45|ENSG00000166780|protein_coding	-1.33491	4.09586	4.69647e-13	4.97905e-12	Down-regulated gene
CYSLTR1|ENSG00000173198|protein_coding	-1.37747	2.14325	4.89462e-13	5.17447e-12	Down-regulated gene
RBPMS|ENSG00000157110|protein_coding	-1.27187	6.78325	4.91954e-13	5.19787e-12	Down-regulated gene
WFIKKN2|ENSG00000173714|protein_coding	-1.99377	-2.02164	4.99936e-13	5.27328e-12	Down-regulated gene
BLVRB|ENSG00000090013|protein_coding	-1.04971	6.26492	5.16625e-13	5.44012e-12	Down-regulated gene
GNG8|ENSG00000167414|protein_coding	-1.71552	-2.66087	5.22854e-13	5.50261e-12	Down-regulated gene
BFSP2|ENSG00000170819|protein_coding	-1.75663	-1.63947	5.76069e-13	6.04227e-12	Down-regulated gene
SLC18A3|ENSG00000187714|protein_coding	-2.99562	-0.709278	5.86484e-13	6.14462e-12	Down-regulated gene
CHRDL1|ENSG00000101938|protein_coding	-2.30528	4.11981	5.95051e-13	6.23089e-12	Down-regulated gene
LRCH2|ENSG00000130224|protein_coding	-1.40068	1.90392	6.08163e-13	6.35751e-12	Down-regulated gene
PDE1B|ENSG00000123360|protein_coding	-1.46397	2.41319	6.11524e-13	6.38552e-12	Down-regulated gene
TAGLN3|ENSG00000144834|protein_coding	-2.48212	-1.06165	6.23368e-13	6.50556e-12	Down-regulated gene
BTNL3|ENSG00000168903|protein_coding	-2.43679	3.05727	6.65839e-13	6.93718e-12	Down-regulated gene
ZFPM2|ENSG00000169946|protein_coding	-1.50877	2.75929	6.83158e-13	7.10971e-12	Down-regulated gene
ARG2|ENSG00000081181|protein_coding	-1.25798	1.98095	7.3664e-13	7.64505e-12	Down-regulated gene
INPP5J|ENSG00000185133|protein_coding	-1.22653	3.32904	7.39048e-13	7.66578e-12	Down-regulated gene
KIAA0408|ENSG00000189367|protein_coding	-2.3584	-1.77092	7.4192e-13	7.69131e-12	Down-regulated gene
RAI2|ENSG00000131831|protein_coding	-1.41079	4.42934	7.77102e-13	8.04266e-12	Down-regulated gene
TMEM252|ENSG00000181778|protein_coding	-2.39566	0.510555	8.25809e-13	8.51848e-12	Down-regulated gene
GLIPR2|ENSG00000122694|protein_coding	-1.13429	4.33349	8.31229e-13	8.56967e-12	Down-regulated gene
CPB1|ENSG00000153002|protein_coding	-2.71108	0.319093	8.33834e-13	8.5918e-12	Down-regulated gene
MAPT|ENSG00000186868|protein_coding	-1.93509	2.59545	8.41607e-13	8.66711e-12	Down-regulated gene
PLPP7|ENSG00000160539|protein_coding	-1.43655	1.32937	8.78319e-13	9.03525e-12	Down-regulated gene
KCNN3|ENSG00000143603|protein_coding	-1.47519	4.01079	8.78909e-13	9.03634e-12	Down-regulated gene
LRRTM1|ENSG00000162951|protein_coding	-2.41279	-0.491757	9.18187e-13	9.43499e-12	Down-regulated gene
S1PR5|ENSG00000180739|protein_coding	-1.5011	0.561379	9.86141e-13	1.00834e-11	Down-regulated gene
SLC9A4|ENSG00000180251|protein_coding	-2.58642	3.62895	9.94984e-13	1.01572e-11	Down-regulated gene
SBSPON|ENSG00000164764|protein_coding	-1.83556	3.56328	1.03451e-12	1.05148e-11	Down-regulated gene
CPNE5|ENSG00000124772|protein_coding	-1.32363	3.67579	1.03839e-12	1.05485e-11	Down-regulated gene
MAPK4|ENSG00000141639|protein_coding	-2.44293	2.33926	1.03986e-12	1.05519e-11	Down-regulated gene
FRRS1L|ENSG00000260230|protein_coding	-2.42008	2.21123	1.04525e-12	1.06009e-11	Down-regulated gene
SERPINB13|ENSG00000197641|protein_coding	-4.12223	3.15547	1.06646e-12	1.08044e-11	Down-regulated gene
N4BP3|ENSG00000145911|protein_coding	-1.24941	3.32495	1.07693e-12	1.08986e-11	Down-regulated gene
LIPF|ENSG00000182333|protein_coding	-3.70576	10.5152	1.11159e-12	1.12311e-11	Down-regulated gene
ABCA9|ENSG00000154258|protein_coding	-1.72493	2.19396	1.11294e-12	1.12387e-11	Down-regulated gene
C2orf54|ENSG00000172478|protein_coding	-2.11364	4.06753	1.12075e-12	1.13115e-11	Down-regulated gene
PPY|ENSG00000108849|protein_coding	-2.88554	-2.33083	1.14305e-12	1.15303e-11	Down-regulated gene
JPH4|ENSG00000092051|protein_coding	-1.42848	-0.315091	1.15348e-12	1.16293e-11	Down-regulated gene
GDPD3|ENSG00000102886|protein_coding	-1.51269	3.15737	1.16291e-12	1.1718e-11	Down-regulated gene
LPAR1|ENSG00000198121|protein_coding	-1.26665	4.10916	1.20753e-12	1.21415e-11	Down-regulated gene
CNTN2|ENSG00000184144|protein_coding	-1.95419	0.0679001	1.22064e-12	1.22601e-11	Down-regulated gene
LANCL3|ENSG00000147036|protein_coding	-1.50099	0.908599	1.2324e-12	1.23716e-11	Down-regulated gene
ARHGEF4|ENSG00000136002|protein_coding	-1.85134	3.86601	1.23472e-12	1.23883e-11	Down-regulated gene
FRMD1|ENSG00000153303|protein_coding	-2.31486	0.967801	1.24044e-12	1.24323e-11	Down-regulated gene
ZNF781|ENSG00000196381|protein_coding	-1.38011	-0.126547	1.24352e-12	1.24565e-11	Down-regulated gene
GEM|ENSG00000164949|protein_coding	-1.3398	5.66962	1.2459e-12	1.24737e-11	Down-regulated gene
SELENBP1|ENSG00000143416|protein_coding	-1.25222	6.23768	1.24702e-12	1.24751e-11	Down-regulated gene
AKR1B10|ENSG00000198074|protein_coding	-2.36244	7.33817	1.24797e-12	1.24751e-11	Down-regulated gene
CCKBR|ENSG00000110148|protein_coding	-2.77971	1.70355	1.24804e-12	1.24751e-11	Down-regulated gene
FOS|ENSG00000170345|protein_coding	-1.41223	8.43998	1.3115e-12	1.30884e-11	Down-regulated gene
TMED6|ENSG00000157315|protein_coding	-1.61868	1.02837	1.34527e-12	1.34111e-11	Down-regulated gene
SPRR1A|ENSG00000169474|protein_coding	-3.76072	5.43676	1.36669e-12	1.36102e-11	Down-regulated gene
ESRRB|ENSG00000119715|protein_coding	-1.88868	-0.552594	1.37527e-12	1.36883e-11	Down-regulated gene
STMN2|ENSG00000104435|protein_coding	-2.23997	1.66113	1.4388e-12	1.42903e-11	Down-regulated gene
SPACA9|ENSG00000165698|protein_coding	-1.04143	2.57999	1.47853e-12	1.46537e-11	Down-regulated gene
VILL|ENSG00000136059|protein_coding	-1.48666	6.17504	1.61867e-12	1.59582e-11	Down-regulated gene
SCNN1G|ENSG00000166828|protein_coding	-2.72104	1.39685	1.62054e-12	1.59682e-11	Down-regulated gene
LYNX1|ENSG00000180155|protein_coding	-2.2449	5.2983	1.6797e-12	1.6499e-11	Down-regulated gene
PHYHD1|ENSG00000175287|protein_coding	-1.57758	2.80943	1.73953e-12	1.70687e-11	Down-regulated gene
TUBB2A|ENSG00000137267|protein_coding	-1.07495	4.68429	1.74913e-12	1.71449e-11	Down-regulated gene
ROR2|ENSG00000169071|protein_coding	-1.60544	4.37066	1.76672e-12	1.72992e-11	Down-regulated gene
SNTA1|ENSG00000101400|protein_coding	-1.24431	4.15946	1.79752e-12	1.7564e-11	Down-regulated gene
FBXO32|ENSG00000156804|protein_coding	-1.51742	6.58022	1.80731e-12	1.76505e-11	Down-regulated gene
PDILT|ENSG00000169340|protein_coding	-3.18008	-0.341018	1.84854e-12	1.8025e-11	Down-regulated gene
CYP2C9|ENSG00000138109|protein_coding	-1.99405	2.48369	1.85533e-12	1.80818e-11	Down-regulated gene
SSUH2|ENSG00000125046|protein_coding	-1.77198	1.28592	1.88237e-12	1.83358e-11	Down-regulated gene
CXCL12|ENSG00000107562|protein_coding	-1.48928	5.68852	1.92165e-12	1.86795e-11	Down-regulated gene
IP6K3|ENSG00000161896|protein_coding	-1.80645	-0.91675	1.9244e-12	1.86964e-11	Down-regulated gene
LVRN|ENSG00000172901|protein_coding	-1.77977	-0.828782	1.93949e-12	1.8804e-11	Down-regulated gene
F11|ENSG00000088926|protein_coding	-2.57468	-0.852521	1.94899e-12	1.88863e-11	Down-regulated gene
MMP27|ENSG00000137675|protein_coding	-2.0697	-3.32405	1.98939e-12	1.92579e-11	Down-regulated gene
RNF223|ENSG00000237330|protein_coding	-1.73008	2.43548	2.00142e-12	1.93543e-11	Down-regulated gene
NACC2|ENSG00000148411|protein_coding	-1.08977	5.86388	2.03032e-12	1.96135e-11	Down-regulated gene
FNDC4|ENSG00000115226|protein_coding	-1.30006	2.6245	2.05774e-12	1.98681e-11	Down-regulated gene
GLP2R|ENSG00000065325|protein_coding	-1.87638	1.34513	2.06761e-12	1.99531e-11	Down-regulated gene
PLSCR5|ENSG00000231213|protein_coding	-3.08077	-3.71227	2.20671e-12	2.12188e-11	Down-regulated gene
PAMR1|ENSG00000149090|protein_coding	-1.26636	2.65201	2.27279e-12	2.17911e-11	Down-regulated gene
CNN1|ENSG00000130176|protein_coding	-2.425	8.64239	2.27321e-12	2.17911e-11	Down-regulated gene
FOXD3|ENSG00000187140|protein_coding	-2.15258	-0.464314	2.31138e-12	2.21457e-11	Down-regulated gene
EMP3|ENSG00000142227|protein_coding	-1.16228	5.1079	2.50382e-12	2.38794e-11	Down-regulated gene
SEC14L2|ENSG00000100003|protein_coding	-1.09989	3.79868	2.58363e-12	2.4603e-11	Down-regulated gene
EFCC1|ENSG00000114654|protein_coding	-1.18224	2.40224	2.59446e-12	2.46936e-11	Down-regulated gene
DZIP1|ENSG00000134874|protein_coding	-1.32173	3.37075	2.62729e-12	2.49806e-11	Down-regulated gene
SCHIP1|ENSG00000151967|protein_coding	-1.39613	0.367933	2.66287e-12	2.52932e-11	Down-regulated gene
SRPX|ENSG00000101955|protein_coding	-1.60482	3.64221	2.73567e-12	2.59452e-11	Down-regulated gene
ACTC1|ENSG00000159251|protein_coding	-1.91241	3.08045	2.78753e-12	2.64002e-11	Down-regulated gene
P2RY2|ENSG00000175591|protein_coding	-1.57948	2.65227	2.78788e-12	2.64002e-11	Down-regulated gene
NUDT10|ENSG00000122824|protein_coding	-1.84827	-0.667583	2.83853e-12	2.68526e-11	Down-regulated gene
AADAC|ENSG00000114771|protein_coding	-2.22331	3.86482	2.85917e-12	2.70342e-11	Down-regulated gene
ZSCAN31|ENSG00000235109|protein_coding	-1.02274	3.077	2.90017e-12	2.73942e-11	Down-regulated gene
SLC39A2|ENSG00000165794|protein_coding	-2.94541	-0.37588	3.02112e-12	2.84935e-11	Down-regulated gene
MAGEH1|ENSG00000187601|protein_coding	-1.09563	3.24948	3.02648e-12	2.85297e-11	Down-regulated gene
CNKSR2|ENSG00000149970|protein_coding	-2.17858	1.36067	3.0303e-12	2.85514e-11	Down-regulated gene
ST6GAL2|ENSG00000144057|protein_coding	-1.88295	1.19177	3.06792e-12	2.88767e-11	Down-regulated gene
RYR2|ENSG00000198626|protein_coding	-1.8573	3.51245	3.2408e-12	3.04427e-11	Down-regulated gene
ZNF135|ENSG00000176293|protein_coding	-1.3888	1.18906	3.32894e-12	3.12236e-11	Down-regulated gene
CBR3|ENSG00000159231|protein_coding	-1.2082	1.73609	3.4133e-12	3.19989e-11	Down-regulated gene
FMO2|ENSG00000094963|protein_coding	-1.9172	4.12182	3.55209e-12	3.32333e-11	Down-regulated gene
AKR1C2|ENSG00000151632|protein_coding	-2.18247	4.76601	3.59956e-12	3.36439e-11	Down-regulated gene
C10orf143|ENSG00000237489|protein_coding	-1.005	0.139409	3.61024e-12	3.371e-11	Down-regulated gene
MASP1|ENSG00000127241|protein_coding	-1.77175	1.56344	3.63394e-12	3.38805e-11	Down-regulated gene
SLC35F1|ENSG00000196376|protein_coding	-1.70248	0.937062	3.87532e-12	3.60591e-11	Down-regulated gene
MYOCD|ENSG00000141052|protein_coding	-2.00236	4.62176	3.90714e-12	3.63371e-11	Down-regulated gene
TCEAL3|ENSG00000196507|protein_coding	-1.12366	3.71784	3.93466e-12	3.65749e-11	Down-regulated gene
CLCA2|ENSG00000137975|protein_coding	-3.33734	4.1607	4.10583e-12	3.81092e-11	Down-regulated gene
CAND2|ENSG00000144712|protein_coding	-1.64509	2.57521	4.13543e-12	3.8365e-11	Down-regulated gene
PPM1L|ENSG00000163590|protein_coding	-1.09058	5.18638	4.15517e-12	3.8529e-11	Down-regulated gene
ADAMTSL4|ENSG00000143382|protein_coding	-1.33673	4.64124	4.17511e-12	3.86948e-11	Down-regulated gene
SH3GL3|ENSG00000140600|protein_coding	-2.52702	-1.51986	4.64809e-12	4.29295e-11	Down-regulated gene
TMEM47|ENSG00000147027|protein_coding	-1.31201	5.22248	5.10397e-12	4.68623e-11	Down-regulated gene
AFF3|ENSG00000144218|protein_coding	-1.76884	2.87042	5.11285e-12	4.69209e-11	Down-regulated gene
CLDN17|ENSG00000156282|protein_coding	-4.43593	-1.97521	5.1649e-12	4.73753e-11	Down-regulated gene
SLC16A7|ENSG00000118596|protein_coding	-1.44145	4.00596	5.47271e-12	5.0027e-11	Down-regulated gene
SMIM6|ENSG00000259120|protein_coding	-1.61648	2.75964	5.85082e-12	5.33271e-11	Down-regulated gene
CMA1|ENSG00000092009|protein_coding	-2.30259	-0.88437	6.11437e-12	5.55938e-11	Down-regulated gene
GPR17|ENSG00000144230|protein_coding	-1.76914	0.0727534	6.25471e-12	5.68422e-11	Down-regulated gene
RTL8B|ENSG00000212747|protein_coding	-1.17088	3.52496	6.94957e-12	6.28822e-11	Down-regulated gene
KCNN2|ENSG00000080709|protein_coding	-1.41886	0.358038	7.23502e-12	6.54018e-11	Down-regulated gene
C8G|ENSG00000176919|protein_coding	-2.23719	2.51	7.68625e-12	6.93133e-11	Down-regulated gene
TXLNB|ENSG00000164440|protein_coding	-1.48542	0.764941	7.81199e-12	7.04133e-11	Down-regulated gene
RRAD|ENSG00000166592|protein_coding	-1.67386	3.24907	8.00727e-12	7.2104e-11	Down-regulated gene
COL19A1|ENSG00000082293|protein_coding	-2.08251	0.358242	8.01594e-12	7.21473e-11	Down-regulated gene
DMRTA1|ENSG00000176399|protein_coding	-1.99333	0.956168	8.19569e-12	7.36943e-11	Down-regulated gene
NPY2R|ENSG00000185149|protein_coding	-2.90214	-3.29296	8.20227e-12	7.3718e-11	Down-regulated gene
SMARCD3|ENSG00000082014|protein_coding	-1.14244	3.61796	8.28319e-12	7.43382e-11	Down-regulated gene
PLPPR5|ENSG00000117598|protein_coding	-2.34173	-2.59975	8.36505e-12	7.50369e-11	Down-regulated gene
DCLK2|ENSG00000170390|protein_coding	-1.46227	2.53733	8.67762e-12	7.76545e-11	Down-regulated gene
OSBPL1A|ENSG00000141447|protein_coding	-1.02849	5.14873	8.77819e-12	7.85169e-11	Down-regulated gene
WFDC1|ENSG00000103175|protein_coding	-1.38671	3.97165	8.86153e-12	7.92245e-11	Down-regulated gene
C14orf132|ENSG00000227051|protein_coding	-1.58724	4.42777	9.09107e-12	8.11991e-11	Down-regulated gene
CAVIN2|ENSG00000168497|protein_coding	-1.54341	4.69998	9.10024e-12	8.12422e-11	Down-regulated gene
SYNGR1|ENSG00000100321|protein_coding	-1.56249	3.78497	9.11371e-12	8.13236e-11	Down-regulated gene
CCL14|ENSG00000276409|protein_coding	-1.57105	0.614653	9.34007e-12	8.31168e-11	Down-regulated gene
SPAG17|ENSG00000155761|protein_coding	-2.19076	0.996871	9.34132e-12	8.31168e-11	Down-regulated gene
NR3C2|ENSG00000151623|protein_coding	-1.22576	4.2027	9.47854e-12	8.42978e-11	Down-regulated gene
SATB1|ENSG00000182568|protein_coding	-1.09168	5.13891	9.61505e-12	8.54306e-11	Down-regulated gene
IRX1|ENSG00000170549|protein_coding	-2.28441	-2.55174	9.71194e-12	8.61687e-11	Down-regulated gene
SPARCL1|ENSG00000152583|protein_coding	-1.61322	8.36087	9.73051e-12	8.62926e-11	Down-regulated gene
EAF2|ENSG00000145088|protein_coding	-1.01425	2.029	9.87121e-12	8.74989e-11	Down-regulated gene
MAP1B|ENSG00000131711|protein_coding	-1.49871	6.55162	1.01394e-11	8.98336e-11	Down-regulated gene
ITPR1|ENSG00000150995|protein_coding	-1.11707	4.96619	1.01893e-11	9.02331e-11	Down-regulated gene
SETBP1|ENSG00000152217|protein_coding	-1.44467	4.43924	1.0418e-11	9.21708e-11	Down-regulated gene
CAV1|ENSG00000105974|protein_coding	-1.4546	6.75276	1.06964e-11	9.45894e-11	Down-regulated gene
ACER2|ENSG00000177076|protein_coding	-1.59322	3.97483	1.07158e-11	9.47159e-11	Down-regulated gene
PIANP|ENSG00000139200|protein_coding	-1.58215	0.584569	1.10751e-11	9.76611e-11	Down-regulated gene
SPART|ENSG00000133104|protein_coding	-1.21394	4.65686	1.11388e-11	9.81772e-11	Down-regulated gene
SGK1|ENSG00000118515|protein_coding	-1.09698	6.6921	1.12933e-11	9.93512e-11	Down-regulated gene
SOX21|ENSG00000125285|protein_coding	-2.5547	3.51803	1.15215e-11	1.01264e-10	Down-regulated gene
GRID2|ENSG00000152208|protein_coding	-2.15281	-1.12312	1.27939e-11	1.11869e-10	Down-regulated gene
ITGA7|ENSG00000135424|protein_coding	-1.53825	5.23993	1.28299e-11	1.12131e-10	Down-regulated gene
FRMD6|ENSG00000139926|protein_coding	-1.30575	4.84123	1.3575e-11	1.18146e-10	Down-regulated gene
NME4|ENSG00000103202|protein_coding	-1.09288	5.90344	1.37465e-11	1.19528e-10	Down-regulated gene
PDLIM7|ENSG00000196923|protein_coding	-1.23954	6.92054	1.4995e-11	1.29362e-10	Down-regulated gene
ZBTB7C|ENSG00000184828|protein_coding	-1.78195	5.01589	1.51797e-11	1.30835e-10	Down-regulated gene
PTX3|ENSG00000163661|protein_coding	-1.582	0.427046	1.57652e-11	1.35507e-10	Down-regulated gene
LRRK2|ENSG00000188906|protein_coding	-1.36957	3.53534	1.58095e-11	1.35763e-10	Down-regulated gene
SLC16A9|ENSG00000165449|protein_coding	-1.84795	2.335	1.61355e-11	1.38435e-10	Down-regulated gene
ADRB3|ENSG00000188778|protein_coding	-2.24484	-0.607657	1.61939e-11	1.38872e-10	Down-regulated gene
CRTAC1|ENSG00000095713|protein_coding	-2.07757	0.96614	1.6799e-11	1.43901e-10	Down-regulated gene
PDXP|ENSG00000241360|protein_coding	-1.0398	2.396	1.68034e-11	1.43901e-10	Down-regulated gene
ADAM33|ENSG00000149451|protein_coding	-1.79938	3.47104	1.69022e-11	1.44682e-10	Down-regulated gene
NOVA1|ENSG00000139910|protein_coding	-1.74291	2.36909	1.69773e-11	1.45258e-10	Down-regulated gene
ZBED2|ENSG00000177494|protein_coding	-1.88501	1.0835	1.74542e-11	1.48929e-10	Down-regulated gene
NFIA|ENSG00000162599|protein_coding	-1.01861	6.52047	1.79296e-11	1.52847e-10	Down-regulated gene
IRX4|ENSG00000113430|protein_coding	-3.01944	-0.274438	1.80277e-11	1.53543e-10	Down-regulated gene
PGA3|ENSG00000229859|protein_coding	-3.91171	8.3021	1.86177e-11	1.58424e-10	Down-regulated gene
ABCA8|ENSG00000141338|protein_coding	-1.8481	3.74194	1.9894e-11	1.68594e-10	Down-regulated gene
RASGEF1C|ENSG00000146090|protein_coding	-1.85053	-0.805033	2.01283e-11	1.70425e-10	Down-regulated gene
MT1E|ENSG00000169715|protein_coding	-1.52801	6.04247	2.0389e-11	1.72399e-10	Down-regulated gene
TPD52L1|ENSG00000111907|protein_coding	-1.60481	3.93625	2.07619e-11	1.75315e-10	Down-regulated gene
TMEM132E|ENSG00000181291|protein_coding	-1.5948	0.284574	2.10113e-11	1.77261e-10	Down-regulated gene
NRXN3|ENSG00000021645|protein_coding	-1.97605	4.16047	2.13113e-11	1.7963e-10	Down-regulated gene
PDE1C|ENSG00000154678|protein_coding	-1.45034	2.56871	2.15447e-11	1.81515e-10	Down-regulated gene
IL36RN|ENSG00000136695|protein_coding	-3.33702	0.695687	2.22892e-11	1.87113e-10	Down-regulated gene
BHLHA15|ENSG00000180535|protein_coding	-1.72393	1.86124	2.4261e-11	2.02666e-10	Down-regulated gene
SULT2B1|ENSG00000088002|protein_coding	-1.906	4.30979	2.47183e-11	2.06118e-10	Down-regulated gene
SMYD1|ENSG00000115593|protein_coding	-2.9944	3.51308	2.49154e-11	2.07577e-10	Down-regulated gene
ZP1|ENSG00000149506|protein_coding	-1.4956	-2.25568	2.53477e-11	2.1099e-10	Down-regulated gene
WNT9A|ENSG00000143816|protein_coding	-1.70257	2.69712	2.54626e-11	2.11852e-10	Down-regulated gene
ZEB1|ENSG00000148516|protein_coding	-1.28782	5.92947	2.59342e-11	2.15585e-10	Down-regulated gene
PDGFD|ENSG00000170962|protein_coding	-1.21832	3.84029	2.62274e-11	2.17732e-10	Down-regulated gene
CAPN9|ENSG00000135773|protein_coding	-2.16739	3.53036	2.638e-11	2.18901e-10	Down-regulated gene
AP1S2|ENSG00000182287|protein_coding	-1.07338	4.74663	2.66983e-11	2.21444e-10	Down-regulated gene
KCNMA1|ENSG00000156113|protein_coding	-2.01791	6.1623	2.77647e-11	2.29679e-10	Down-regulated gene
CYP2J2|ENSG00000134716|protein_coding	-1.4208	3.70381	2.79991e-11	2.31515e-10	Down-regulated gene
RFX2|ENSG00000087903|protein_coding	-1.04555	4.08526	2.84915e-11	2.34964e-10	Down-regulated gene
GPR146|ENSG00000164849|protein_coding	-1.06066	0.519362	2.91989e-11	2.40374e-10	Down-regulated gene
TPSG1|ENSG00000116176|protein_coding	-2.03253	0.774662	3.18903e-11	2.60924e-10	Down-regulated gene
SERPINB4|ENSG00000206073|protein_coding	-3.25876	2.39485	3.22396e-11	2.63435e-10	Down-regulated gene
RNLS|ENSG00000184719|protein_coding	-1.34337	1.21287	3.39754e-11	2.77014e-10	Down-regulated gene
ADRA1D|ENSG00000171873|protein_coding	-2.03357	1.82343	3.42454e-11	2.7873e-10	Down-regulated gene
FAM159B|ENSG00000145642|protein_coding	-2.44801	-1.93753	3.59409e-11	2.91342e-10	Down-regulated gene
MLIP|ENSG00000146147|protein_coding	-1.77743	-1.08817	3.59506e-11	2.91342e-10	Down-regulated gene
LRFN5|ENSG00000165379|protein_coding	-1.47806	-0.0673551	3.60237e-11	2.91773e-10	Down-regulated gene
TUBA1A|ENSG00000167552|protein_coding	-1.2435	7.01223	3.60351e-11	2.91773e-10	Down-regulated gene
SALL2|ENSG00000165821|protein_coding	-1.58496	2.83508	3.6539e-11	2.9547e-10	Down-regulated gene
SDR9C7|ENSG00000170426|protein_coding	-3.19254	-0.912696	3.72998e-11	3.01492e-10	Down-regulated gene
SPAG8|ENSG00000137098|protein_coding	-1.07824	-0.462791	3.76196e-11	3.03946e-10	Down-regulated gene
TACR2|ENSG00000075073|protein_coding	-2.3	4.64119	3.82171e-11	3.08241e-10	Down-regulated gene
MCC|ENSG00000171444|protein_coding	-1.1677	4.28379	3.90731e-11	3.14737e-10	Down-regulated gene
HRCT1|ENSG00000196196|protein_coding	-1.60382	0.761995	3.92612e-11	3.16117e-10	Down-regulated gene
PID1|ENSG00000153823|protein_coding	-1.42363	3.82123	3.96575e-11	3.19033e-10	Down-regulated gene
UGT2B7|ENSG00000171234|protein_coding	-2.12099	2.73968	4.00317e-11	3.21767e-10	Down-regulated gene
KCNIP2|ENSG00000120049|protein_coding	-1.15282	0.596838	4.02715e-11	3.235e-10	Down-regulated gene
AMTN|ENSG00000187689|protein_coding	-2.99323	-1.24134	4.20275e-11	3.3694e-10	Down-regulated gene
RNF180|ENSG00000164197|protein_coding	-1.3081	2.08498	4.27978e-11	3.42822e-10	Down-regulated gene
TRPC1|ENSG00000144935|protein_coding	-1.28221	2.07389	4.34808e-11	3.47698e-10	Down-regulated gene
STARD9|ENSG00000159433|protein_coding	-1.29518	3.83317	4.35048e-11	3.47741e-10	Down-regulated gene
MID2|ENSG00000080561|protein_coding	-1.21779	3.06538	4.41427e-11	3.52539e-10	Down-regulated gene
CAVIN1|ENSG00000177469|protein_coding	-1.22426	7.78141	4.49262e-11	3.5849e-10	Down-regulated gene
LPAR3|ENSG00000171517|protein_coding	-1.98433	0.328812	4.52381e-11	3.60825e-10	Down-regulated gene
RDH5|ENSG00000135437|protein_coding	-1.06532	1.40903	4.5773e-11	3.64625e-10	Down-regulated gene
SULT1B1|ENSG00000173597|protein_coding	-1.83554	5.68248	4.8305e-11	3.83651e-10	Down-regulated gene
NPAS1|ENSG00000130751|protein_coding	-1.24788	0.668732	5.04625e-11	3.99431e-10	Down-regulated gene
RGS9|ENSG00000108370|protein_coding	-1.48706	1.2817	5.34496e-11	4.21648e-10	Down-regulated gene
NFASC|ENSG00000163531|protein_coding	-1.64305	5.18737	5.37827e-11	4.24097e-10	Down-regulated gene
SMIM10L2A|ENSG00000178947|protein_coding	-1.49898	0.80843	5.39828e-11	4.25495e-10	Down-regulated gene
KIRREL3|ENSG00000149571|protein_coding	-1.54205	-0.472059	5.41627e-11	4.26734e-10	Down-regulated gene
AMOTL1|ENSG00000166025|protein_coding	-1.24508	6.00698	5.58671e-11	4.39792e-10	Down-regulated gene
TNFRSF13B|ENSG00000240505|protein_coding	-1.96316	0.998956	5.6832e-11	4.46823e-10	Down-regulated gene
KRT5|ENSG00000186081|protein_coding	-3.35472	7.82335	5.74773e-11	4.51139e-10	Down-regulated gene
CELF2|ENSG00000048740|protein_coding	-1.28848	5.4633	5.8524e-11	4.58393e-10	Down-regulated gene
TMEM255A|ENSG00000125355|protein_coding	-1.40417	1.77315	5.89802e-11	4.6158e-10	Down-regulated gene
CLCA1|ENSG00000016490|protein_coding	-3.27089	5.2153	6.08229e-11	4.75404e-10	Down-regulated gene
MT1A|ENSG00000205362|protein_coding	-1.90074	0.997559	6.18953e-11	4.82778e-10	Down-regulated gene
NKX2-3|ENSG00000119919|protein_coding	-1.51846	0.837118	6.33269e-11	4.9352e-10	Down-regulated gene
CARTPT|ENSG00000164326|protein_coding	-3.00817	1.65276	6.39347e-11	4.97648e-10	Down-regulated gene
GPR25|ENSG00000170128|protein_coding	-1.70185	0.803424	6.50952e-11	5.05839e-10	Down-regulated gene
FAM13A|ENSG00000138640|protein_coding	-1.03117	4.77569	6.53176e-11	5.07147e-10	Down-regulated gene
FEZ1|ENSG00000149557|protein_coding	-1.18219	3.16357	6.54716e-11	5.08131e-10	Down-regulated gene
GPR15|ENSG00000154165|protein_coding	-2.1088	0.110904	6.66648e-11	5.16963e-10	Down-regulated gene
CALML3|ENSG00000178363|protein_coding	-3.56626	3.8111	6.71941e-11	5.20851e-10	Down-regulated gene
GJC1|ENSG00000182963|protein_coding	-1.34275	4.13699	6.93203e-11	5.36444e-10	Down-regulated gene
PCSK2|ENSG00000125851|protein_coding	-2.47769	1.33099	7.03487e-11	5.44177e-10	Down-regulated gene
FAXC|ENSG00000146267|protein_coding	-1.8455	2.39947	7.33257e-11	5.66269e-10	Down-regulated gene
ACKR1|ENSG00000213088|protein_coding	-1.74513	4.5124	7.35646e-11	5.6788e-10	Down-regulated gene
CNGA3|ENSG00000144191|protein_coding	-1.89736	-0.589372	7.38467e-11	5.69822e-10	Down-regulated gene
B3GAT1|ENSG00000109956|protein_coding	-1.82033	1.56633	7.83749e-11	6.03768e-10	Down-regulated gene
ICAM3|ENSG00000076662|protein_coding	-1.55121	1.76896	8.17603e-11	6.28295e-10	Down-regulated gene
KCNQ5|ENSG00000185760|protein_coding	-1.66637	0.266729	8.28928e-11	6.36214e-10	Down-regulated gene
SLC26A7|ENSG00000147606|protein_coding	-1.82525	-0.046826	8.55206e-11	6.54772e-10	Down-regulated gene
KIAA1614|ENSG00000135835|protein_coding	-1.07733	2.18992	8.64501e-11	6.60537e-10	Down-regulated gene
ZCCHC12|ENSG00000174460|protein_coding	-1.8307	-0.593376	8.74905e-11	6.68213e-10	Down-regulated gene
SELENOP|ENSG00000250722|protein_coding	-1.34692	6.44999	9.10737e-11	6.92752e-10	Down-regulated gene
CTSF|ENSG00000174080|protein_coding	-1.24975	4.61054	9.12253e-11	6.93624e-10	Down-regulated gene
CEND1|ENSG00000184524|protein_coding	-1.45549	-0.287876	9.57909e-11	7.26861e-10	Down-regulated gene
IL17D|ENSG00000172458|protein_coding	-1.08907	1.40184	9.60854e-11	7.288e-10	Down-regulated gene
SLC9A3R1|ENSG00000109062|protein_coding	-1.01774	7.4878	9.86476e-11	7.46721e-10	Down-regulated gene
ASIC5|ENSG00000256394|protein_coding	-2.62435	-3.29167	1.0459e-10	7.88831e-10	Down-regulated gene
DGKA|ENSG00000065357|protein_coding	-1.04025	5.30371	1.0692e-10	8.05429e-10	Down-regulated gene
AK5|ENSG00000154027|protein_coding	-1.55389	0.309408	1.07935e-10	8.12422e-10	Down-regulated gene
CLEC3A|ENSG00000166509|protein_coding	-2.44459	-2.11471	1.08632e-10	8.16683e-10	Down-regulated gene
RAB6B|ENSG00000154917|protein_coding	-1.24505	3.10682	1.09877e-10	8.25049e-10	Down-regulated gene
RAB38|ENSG00000123892|protein_coding	-1.31381	1.99276	1.14593e-10	8.59427e-10	Down-regulated gene
SLC6A11|ENSG00000132164|protein_coding	-2.52739	0.0244515	1.22701e-10	9.14834e-10	Down-regulated gene
DAPL1|ENSG00000163331|protein_coding	-2.53346	2.0468	1.25233e-10	9.32492e-10	Down-regulated gene
NXPH3|ENSG00000182575|protein_coding	-1.81962	2.41843	1.26882e-10	9.44398e-10	Down-regulated gene
HSPB7|ENSG00000173641|protein_coding	-2.10772	5.55851	1.27865e-10	9.5096e-10	Down-regulated gene
PLA2G5|ENSG00000127472|protein_coding	-1.66767	0.881705	1.29537e-10	9.61866e-10	Down-regulated gene
GNAZ|ENSG00000128266|protein_coding	-1.38559	3.36962	1.30696e-10	9.69313e-10	Down-regulated gene
ARHGAP20|ENSG00000137727|protein_coding	-1.33801	1.7196	1.31564e-10	9.74982e-10	Down-regulated gene
MAGEE1|ENSG00000198934|protein_coding	-1.31851	1.42748	1.32439e-10	9.80777e-10	Down-regulated gene
SERPINB2|ENSG00000197632|protein_coding	-2.6554	3.94177	1.32451e-10	9.80777e-10	Down-regulated gene
C8orf46|ENSG00000169085|protein_coding	-1.87837	-0.197937	1.33387e-10	9.87315e-10	Down-regulated gene
VIPR2|ENSG00000106018|protein_coding	-1.82161	1.57254	1.37557e-10	1.01697e-09	Down-regulated gene
VLDLR|ENSG00000147852|protein_coding	-1.37666	3.51318	1.43049e-10	1.05549e-09	Down-regulated gene
AKR1C3|ENSG00000196139|protein_coding	-1.45487	6.76947	1.43665e-10	1.05962e-09	Down-regulated gene
FNBP1|ENSG00000187239|protein_coding	-1.25701	6.24874	1.5106e-10	1.11066e-09	Down-regulated gene
ACADL|ENSG00000115361|protein_coding	-1.79134	-0.75282	1.52847e-10	1.12336e-09	Down-regulated gene
STK32B|ENSG00000152953|protein_coding	-1.30958	1.60463	1.59373e-10	1.16994e-09	Down-regulated gene
IVL|ENSG00000163207|protein_coding	-4.05413	3.83653	1.6138e-10	1.18422e-09	Down-regulated gene
ASAP3|ENSG00000088280|protein_coding	-1.0294	4.04522	1.68961e-10	1.2379e-09	Down-regulated gene
LRP1B|ENSG00000168702|protein_coding	-1.88052	-0.564873	1.70076e-10	1.24509e-09	Down-regulated gene
CIDEB|ENSG00000136305|protein_coding	-1.32346	-1.16323	1.726e-10	1.26308e-09	Down-regulated gene
LPP|ENSG00000145012|protein_coding	-1.20053	9.10559	1.77111e-10	1.29502e-09	Down-regulated gene
ODF3L1|ENSG00000182950|protein_coding	-1.3318	0.0721813	1.80326e-10	1.31602e-09	Down-regulated gene
NIM1K|ENSG00000177453|protein_coding	-1.10782	-0.561203	1.86984e-10	1.36248e-09	Down-regulated gene
GNAI1|ENSG00000127955|protein_coding	-1.09255	4.27129	1.88213e-10	1.37037e-09	Down-regulated gene
PDE8B|ENSG00000113231|protein_coding	-1.04141	2.58651	1.89766e-10	1.3806e-09	Down-regulated gene
SLC30A10|ENSG00000196660|protein_coding	-2.18539	0.595974	1.90113e-10	1.38259e-09	Down-regulated gene
PRDM1|ENSG00000057657|protein_coding	-1.02284	5.89542	1.91753e-10	1.39343e-09	Down-regulated gene
VAT1L|ENSG00000171724|protein_coding	-1.34851	2.14341	1.95123e-10	1.41737e-09	Down-regulated gene
PPP1R12B|ENSG00000077157|protein_coding	-1.70854	8.16439	1.9877e-10	1.44218e-09	Down-regulated gene
KIAA1644|ENSG00000138944|protein_coding	-1.84719	3.48645	2.02561e-10	1.46798e-09	Down-regulated gene
DLC1|ENSG00000164741|protein_coding	-1.04696	5.55383	2.03778e-10	1.47622e-09	Down-regulated gene
NCKAP5|ENSG00000176771|protein_coding	-1.2859	2.00237	2.04726e-10	1.48195e-09	Down-regulated gene
ASB5|ENSG00000164122|protein_coding	-2.7252	1.95798	2.05032e-10	1.48359e-09	Down-regulated gene
LARP6|ENSG00000166173|protein_coding	-1.28247	3.18427	2.05423e-10	1.48584e-09	Down-regulated gene
EPHX1|ENSG00000143819|protein_coding	-1.0054	6.61758	2.10267e-10	1.52029e-09	Down-regulated gene
LDOC1|ENSG00000182195|protein_coding	-1.35858	3.71228	2.12616e-10	1.53668e-09	Down-regulated gene
MRVI1|ENSG00000072952|protein_coding	-1.43836	6.19864	2.30112e-10	1.65738e-09	Down-regulated gene
ID1|ENSG00000125968|protein_coding	-1.2046	6.76086	2.32572e-10	1.67251e-09	Down-regulated gene
TCEAL5|ENSG00000204065|protein_coding	-1.97609	-1.94453	2.40934e-10	1.72866e-09	Down-regulated gene
CD207|ENSG00000116031|protein_coding	-1.70241	0.354817	2.42858e-10	1.74113e-09	Down-regulated gene
CTTNBP2|ENSG00000077063|protein_coding	-1.52296	2.62706	2.44667e-10	1.75343e-09	Down-regulated gene
TST|ENSG00000128311|protein_coding	-1.04234	6.25864	2.58765e-10	1.85021e-09	Down-regulated gene
KCTD8|ENSG00000183783|protein_coding	-2.40181	-1.01242	2.59196e-10	1.85259e-09	Down-regulated gene
ICA1L|ENSG00000163596|protein_coding	-1.10096	2.57821	2.59585e-10	1.85466e-09	Down-regulated gene
KAZALD1|ENSG00000107821|protein_coding	-1.07431	3.52538	2.62226e-10	1.87281e-09	Down-regulated gene
ABCA4|ENSG00000198691|protein_coding	-1.51061	-0.699248	2.64223e-10	1.88564e-09	Down-regulated gene
KCNMB2|ENSG00000197584|protein_coding	-1.68326	-1.22786	2.64838e-10	1.88858e-09	Down-regulated gene
GPR1|ENSG00000183671|protein_coding	-1.62301	-0.0215846	2.6771e-10	1.90688e-09	Down-regulated gene
TPSAB1|ENSG00000172236|protein_coding	-1.46495	4.55238	2.73255e-10	1.94416e-09	Down-regulated gene
HBA2|ENSG00000188536|protein_coding	-1.69909	4.06056	2.83294e-10	2.01176e-09	Down-regulated gene
ELAVL3|ENSG00000196361|protein_coding	-1.75119	-1.39497	2.93218e-10	2.0779e-09	Down-regulated gene
TMOD2|ENSG00000128872|protein_coding	-1.00534	3.92619	2.95906e-10	2.09576e-09	Down-regulated gene
GAS1|ENSG00000180447|protein_coding	-1.607	4.23706	2.96925e-10	2.10218e-09	Down-regulated gene
MT2A|ENSG00000125148|protein_coding	-1.22149	6.79773	2.97189e-10	2.10246e-09	Down-regulated gene
INMT-MINDY4|ENSG00000254959|protein_coding	-2.05524	-2.96939	3.0449e-10	2.1533e-09	Down-regulated gene
SLC10A4|ENSG00000145248|protein_coding	-1.78915	-1.17011	3.06409e-10	2.16605e-09	Down-regulated gene
TMEM37|ENSG00000171227|protein_coding	-1.24442	4.60331	3.08494e-10	2.17914e-09	Down-regulated gene
TMEM92|ENSG00000167105|protein_coding	-1.37538	4.17729	3.15105e-10	2.22416e-09	Down-regulated gene
C12orf54|ENSG00000177627|protein_coding	-1.73734	-2.49975	3.24628e-10	2.28965e-09	Down-regulated gene
AKAP2|ENSG00000241978|protein_coding	-1.18383	0.820594	3.29846e-10	2.3247e-09	Down-regulated gene
ADH4|ENSG00000198099|protein_coding	-2.53241	3.61398	3.30149e-10	2.32596e-09	Down-regulated gene
RIC3|ENSG00000166405|protein_coding	-1.71769	1.44932	3.3152e-10	2.33469e-09	Down-regulated gene
FCER1A|ENSG00000179639|protein_coding	-1.84671	1.02175	3.32105e-10	2.3371e-09	Down-regulated gene
TMEM74|ENSG00000164841|protein_coding	-1.60799	-1.6354	3.32704e-10	2.34044e-09	Down-regulated gene
SYNJ2BP-COX16|ENSG00000258644|protein_coding	-1.01575	-2.05284	3.52773e-10	2.47417e-09	Down-regulated gene
HCAR2|ENSG00000182782|protein_coding	-1.93722	1.38212	3.58441e-10	2.51016e-09	Down-regulated gene
NBEA|ENSG00000172915|protein_coding	-1.61422	3.71335	3.69381e-10	2.58484e-09	Down-regulated gene
KAZN|ENSG00000189337|protein_coding	-1.03436	3.63464	3.73473e-10	2.61055e-09	Down-regulated gene
TMTC1|ENSG00000133687|protein_coding	-1.45065	4.92648	3.74304e-10	2.6144e-09	Down-regulated gene
LIFR|ENSG00000113594|protein_coding	-1.34559	4.63263	3.77854e-10	2.63723e-09	Down-regulated gene
PIP4P2|ENSG00000155099|protein_coding	-1.05608	3.49334	3.80352e-10	2.65332e-09	Down-regulated gene
CNTN1|ENSG00000018236|protein_coding	-2.04411	3.54993	3.8681e-10	2.69471e-09	Down-regulated gene
IL36B|ENSG00000136696|protein_coding	-2.71968	-1.99201	3.99695e-10	2.7793e-09	Down-regulated gene
NSG1|ENSG00000168824|protein_coding	-1.5771	2.58532	4.27837e-10	2.96726e-09	Down-regulated gene
CHL1|ENSG00000134121|protein_coding	-1.4946	3.12586	4.34799e-10	3.0122e-09	Down-regulated gene
MFAP5|ENSG00000197614|protein_coding	-1.55063	4.68833	4.59793e-10	3.17595e-09	Down-regulated gene
MLN|ENSG00000096395|protein_coding	-3.04241	-0.175511	4.67781e-10	3.22993e-09	Down-regulated gene
RNF217|ENSG00000146373|protein_coding	-1.12203	3.65044	4.75491e-10	3.28075e-09	Down-regulated gene
CLMP|ENSG00000166250|protein_coding	-1.45115	4.87493	5.12946e-10	3.53007e-09	Down-regulated gene
GPR135|ENSG00000181619|protein_coding	-1.10485	1.39827	5.17502e-10	3.55947e-09	Down-regulated gene
SLC2A12|ENSG00000146411|protein_coding	-1.52913	3.14477	5.2706e-10	3.62187e-09	Down-regulated gene
TRIM29|ENSG00000137699|protein_coding	-2.07697	7.25607	5.37784e-10	3.6915e-09	Down-regulated gene
SOX5|ENSG00000134532|protein_coding	-1.22561	1.90059	5.42033e-10	3.71793e-09	Down-regulated gene
PCDH9|ENSG00000184226|protein_coding	-1.80166	2.54509	5.52418e-10	3.78778e-09	Down-regulated gene
OLFML3|ENSG00000116774|protein_coding	-1.19114	5.10366	5.63243e-10	3.85635e-09	Down-regulated gene
BST1|ENSG00000109743|protein_coding	-1.21995	2.7876	5.67025e-10	3.87941e-09	Down-regulated gene
ACPP|ENSG00000014257|protein_coding	-1.52064	3.40128	5.72372e-10	3.91312e-09	Down-regulated gene
ANXA8L1|ENSG00000264230|protein_coding	-2.18645	1.90407	5.90946e-10	4.03127e-09	Down-regulated gene
SLC16A6|ENSG00000108932|protein_coding	-1.21296	1.74141	5.98944e-10	4.08435e-09	Down-regulated gene
MT1G|ENSG00000125144|protein_coding	-1.79167	5.67297	6.27737e-10	4.27601e-09	Down-regulated gene
PRKAA2|ENSG00000162409|protein_coding	-1.88682	3.42602	6.28974e-10	4.28133e-09	Down-regulated gene
PINLYP|ENSG00000234465|protein_coding	-1.10937	1.08827	6.37473e-10	4.3376e-09	Down-regulated gene
DNASE1|ENSG00000213918|protein_coding	-1.11032	5.02674	6.70516e-10	4.54591e-09	Down-regulated gene
MST1|ENSG00000173531|protein_coding	-1.34703	2.81808	6.7078e-10	4.54604e-09	Down-regulated gene
PBLD|ENSG00000108187|protein_coding	-1.27968	5.1462	6.77587e-10	4.59051e-09	Down-regulated gene
CH25H|ENSG00000138135|protein_coding	-1.36583	2.35454	7.12169e-10	4.80914e-09	Down-regulated gene
ARG1|ENSG00000118520|protein_coding	-1.46707	-1.38298	7.34315e-10	4.94975e-09	Down-regulated gene
DTX3|ENSG00000178498|protein_coding	-1.12514	4.08019	7.35477e-10	4.9558e-09	Down-regulated gene
FAM3B|ENSG00000183844|protein_coding	-1.82933	5.14507	7.39577e-10	4.97625e-09	Down-regulated gene
SPHKAP|ENSG00000153820|protein_coding	-2.30137	-2.28018	7.55507e-10	5.07432e-09	Down-regulated gene
SMIM10|ENSG00000184785|protein_coding	-1.19518	2.0928	7.62844e-10	5.11808e-09	Down-regulated gene
RAB37|ENSG00000172794|protein_coding	-1.22039	2.33688	8.17663e-10	5.46237e-09	Down-regulated gene
CPXM2|ENSG00000121898|protein_coding	-1.64752	5.23173	8.2414e-10	5.50023e-09	Down-regulated gene
TMEM256-PLSCR3|ENSG00000262481|protein_coding	-1.2889	-3.33491	8.32335e-10	5.55048e-09	Down-regulated gene
LEP|ENSG00000174697|protein_coding	-1.97248	-0.664315	8.65199e-10	5.76348e-09	Down-regulated gene
SLC17A8|ENSG00000179520|protein_coding	-2.62999	-0.605504	8.90812e-10	5.92777e-09	Down-regulated gene
SPATA4|ENSG00000150628|protein_coding	-1.90535	-2.87092	8.93922e-10	5.94423e-09	Down-regulated gene
PGC|ENSG00000096088|protein_coding	-2.71192	11.6658	8.96356e-10	5.9583e-09	Down-regulated gene
ACTG2|ENSG00000163017|protein_coding	-2.23432	10.1847	8.97385e-10	5.96302e-09	Down-regulated gene
TMEFF2|ENSG00000144339|protein_coding	-1.80792	-1.09815	9.14224e-10	6.06845e-09	Down-regulated gene
LMAN1L|ENSG00000140506|protein_coding	-2.1687	-3.60623	9.94769e-10	6.58206e-09	Down-regulated gene
CPE|ENSG00000109472|protein_coding	-1.47436	5.34577	9.97762e-10	6.59721e-09	Down-regulated gene
ZNF626|ENSG00000188171|protein_coding	-1.2718	2.02364	1.08305e-09	7.1334e-09	Down-regulated gene
SPON1|ENSG00000262655|protein_coding	-1.53281	6.57734	1.08467e-09	7.14157e-09	Down-regulated gene
DCT|ENSG00000080166|protein_coding	-1.66714	-2.00278	1.09881e-09	7.22452e-09	Down-regulated gene
RGMA|ENSG00000182175|protein_coding	-1.77985	5.94218	1.09976e-09	7.22819e-09	Down-regulated gene
MUSTN1|ENSG00000272573|protein_coding	-1.58432	-3.92156	1.12469e-09	7.3843e-09	Down-regulated gene
SECTM1|ENSG00000141574|protein_coding	-1.21973	5.89706	1.17255e-09	7.67428e-09	Down-regulated gene
ZNF536|ENSG00000198597|protein_coding	-1.71666	0.563601	1.20453e-09	7.86984e-09	Down-regulated gene
FABP4|ENSG00000170323|protein_coding	-2.04743	2.92251	1.22962e-09	8.01695e-09	Down-regulated gene
SLC26A10|ENSG00000135502|protein_coding	-1.5327	-1.58059	1.23974e-09	8.06756e-09	Down-regulated gene
CRYBG2|ENSG00000176092|protein_coding	-1.48998	4.7242	1.24012e-09	8.06756e-09	Down-regulated gene
SDCBP2|ENSG00000125775|protein_coding	-1.24089	6.22599	1.2404e-09	8.06756e-09	Down-regulated gene
GNMT|ENSG00000124713|protein_coding	-1.43829	-0.599208	1.26753e-09	8.22969e-09	Down-regulated gene
TUB|ENSG00000166402|protein_coding	-1.42116	2.23975	1.29728e-09	8.40657e-09	Down-regulated gene
FAM166B|ENSG00000215187|protein_coding	-1.05192	-1.0576	1.29747e-09	8.40657e-09	Down-regulated gene
MT1F|ENSG00000198417|protein_coding	-1.34463	3.96551	1.3314e-09	8.60667e-09	Down-regulated gene
NR0B2|ENSG00000131910|protein_coding	-1.79367	4.02002	1.38697e-09	8.95237e-09	Down-regulated gene
KCNA3|ENSG00000177272|protein_coding	-1.50499	1.86597	1.39913e-09	9.02775e-09	Down-regulated gene
RBFOX3|ENSG00000167281|protein_coding	-2.16463	1.72994	1.40237e-09	9.04557e-09	Down-regulated gene
CDH20|ENSG00000101542|protein_coding	-1.49484	-2.69188	1.4041e-09	9.05046e-09	Down-regulated gene
PEG3|ENSG00000198300|protein_coding	-1.6936	2.52621	1.41706e-09	9.12773e-09	Down-regulated gene
CSRP2|ENSG00000175183|protein_coding	-1.03864	3.51765	1.45141e-09	9.33931e-09	Down-regulated gene
SYTL1|ENSG00000142765|protein_coding	-1.10129	4.84937	1.45994e-09	9.38779e-09	Down-regulated gene
AC011530.1|ENSG00000268434|protein_coding	-1.91374	-3.80649	1.47804e-09	9.49763e-09	Down-regulated gene
SHISA9|ENSG00000237515|protein_coding	-2.03108	-0.104908	1.49626e-09	9.60152e-09	Down-regulated gene
HOXA5|ENSG00000106004|protein_coding	-1.13766	3.14087	1.52224e-09	9.75818e-09	Down-regulated gene
PPP2R2B|ENSG00000156475|protein_coding	-1.29906	1.05384	1.53255e-09	9.82094e-09	Down-regulated gene
KRT33A|ENSG00000006059|protein_coding	-3.00871	-3.27996	1.56184e-09	1.00003e-08	Down-regulated gene
ZNF853|ENSG00000236609|protein_coding	-1.3225	3.30548	1.56259e-09	1.00003e-08	Down-regulated gene
NRSN1|ENSG00000152954|protein_coding	-2.28593	-1.52151	1.66323e-09	1.06075e-08	Down-regulated gene
PCDHGB7|ENSG00000254122|protein_coding	-1.18545	2.56646	1.69031e-09	1.07655e-08	Down-regulated gene
SOWAHA|ENSG00000198944|protein_coding	-1.50776	3.81766	1.72889e-09	1.1e-08	Down-regulated gene
KCNA2|ENSG00000177301|protein_coding	-1.7746	-0.282967	1.76456e-09	1.12117e-08	Down-regulated gene
ZNF662|ENSG00000182983|protein_coding	-1.36697	1.62221	1.85276e-09	1.17363e-08	Down-regulated gene
AHNAK2|ENSG00000185567|protein_coding	-1.58662	6.95517	1.86012e-09	1.17789e-08	Down-regulated gene
ZNF582|ENSG00000018869|protein_coding	-1.14383	0.274466	1.88484e-09	1.19153e-08	Down-regulated gene
ITM2A|ENSG00000078596|protein_coding	-1.194	4.35959	2.00754e-09	1.26482e-08	Down-regulated gene
ACSL5|ENSG00000197142|protein_coding	-1.16121	7.54225	2.23368e-09	1.40116e-08	Down-regulated gene
PRUNE2|ENSG00000106772|protein_coding	-1.89236	6.86433	2.28466e-09	1.43122e-08	Down-regulated gene
SLC37A2|ENSG00000134955|protein_coding	-1.15289	3.81479	2.2908e-09	1.43459e-08	Down-regulated gene
GPLD1|ENSG00000112293|protein_coding	-1.05981	0.753584	2.34419e-09	1.46655e-08	Down-regulated gene
ZNF540|ENSG00000171817|protein_coding	-1.07128	0.37669	2.42621e-09	1.51335e-08	Down-regulated gene
AL449266.1|ENSG00000274068|protein_coding	-1.27671	-3.40635	2.51613e-09	1.56263e-08	Down-regulated gene
ZFP28|ENSG00000196867|protein_coding	-1.21297	1.64427	2.53457e-09	1.57355e-08	Down-regulated gene
FOXE1|ENSG00000178919|protein_coding	-2.71643	0.329763	2.72744e-09	1.68881e-08	Down-regulated gene
NLGN1|ENSG00000169760|protein_coding	-1.72079	1.10808	2.73055e-09	1.68977e-08	Down-regulated gene
SOD3|ENSG00000109610|protein_coding	-1.2821	6.73147	2.7539e-09	1.70238e-08	Down-regulated gene
SFN|ENSG00000175793|protein_coding	-1.42396	7.42819	2.76574e-09	1.70857e-08	Down-regulated gene
PTPRS|ENSG00000105426|protein_coding	-1.22786	5.59853	2.77053e-09	1.71096e-08	Down-regulated gene
BTNL8|ENSG00000113303|protein_coding	-1.78047	4.20789	2.80264e-09	1.72965e-08	Down-regulated gene
CCER2|ENSG00000262484|protein_coding	-1.3661	-2.05637	3.30777e-09	2.0247e-08	Down-regulated gene
TIMP3|ENSG00000100234|protein_coding	-1.26226	4.54385	3.34265e-09	2.04337e-08	Down-regulated gene
SPTSSB|ENSG00000196542|protein_coding	-1.77932	4.115	3.39439e-09	2.07365e-08	Down-regulated gene
GUCA1C|ENSG00000138472|protein_coding	-2.90044	-3.32883	3.42518e-09	2.09109e-08	Down-regulated gene
KRT6A|ENSG00000205420|protein_coding	-3.1093	8.30255	3.45317e-09	2.10749e-08	Down-regulated gene
SNCG|ENSG00000173267|protein_coding	-1.4635	2.54828	3.50473e-09	2.13478e-08	Down-regulated gene
TCF21|ENSG00000118526|protein_coding	-1.13483	2.95684	3.73099e-09	2.26523e-08	Down-regulated gene
RIPK4|ENSG00000183421|protein_coding	-1.07058	4.94108	3.8373e-09	2.32525e-08	Down-regulated gene
P3H2|ENSG00000090530|protein_coding	-1.34786	4.3405	3.86315e-09	2.34015e-08	Down-regulated gene
MEIS2|ENSG00000134138|protein_coding	-1.01621	4.52729	4.01919e-09	2.43074e-08	Down-regulated gene
PGA5|ENSG00000256713|protein_coding	-3.48868	6.60487	4.02141e-09	2.43129e-08	Down-regulated gene
MCAM|ENSG00000076706|protein_coding	-1.05228	7.3203	4.02588e-09	2.43322e-08	Down-regulated gene
SHF|ENSG00000138606|protein_coding	-1.19314	2.48826	4.13214e-09	2.4926e-08	Down-regulated gene
MYRFL|ENSG00000166268|protein_coding	-1.79983	1.64408	4.17387e-09	2.51534e-08	Down-regulated gene
HSPB1|ENSG00000106211|protein_coding	-1.19948	9.52111	4.20637e-09	2.53238e-08	Down-regulated gene
PLA2G12B|ENSG00000138308|protein_coding	-2.40114	0.941745	4.23312e-09	2.54588e-08	Down-regulated gene
PTGER3|ENSG00000050628|protein_coding	-1.40687	3.33667	4.32742e-09	2.59868e-08	Down-regulated gene
TMEM211|ENSG00000206069|protein_coding	-1.95341	-1.25984	4.47313e-09	2.68359e-08	Down-regulated gene
CRISPLD2|ENSG00000103196|protein_coding	-1.06411	6.64207	4.5918e-09	2.75125e-08	Down-regulated gene
MPP2|ENSG00000108852|protein_coding	-1.27337	2.33134	4.84774e-09	2.89441e-08	Down-regulated gene
FRMPD4|ENSG00000169933|protein_coding	-1.7731	-2.91045	4.90438e-09	2.92636e-08	Down-regulated gene
HSD17B6|ENSG00000025423|protein_coding	-1.06749	1.18941	4.9165e-09	2.93266e-08	Down-regulated gene
SKIDA1|ENSG00000180592|protein_coding	-1.20201	-0.0945725	4.98908e-09	2.97217e-08	Down-regulated gene
SCARA3|ENSG00000168077|protein_coding	-1.28251	4.80139	5.03019e-09	2.99475e-08	Down-regulated gene
SSC5D|ENSG00000179954|protein_coding	-1.42882	5.18745	5.15011e-09	3.06225e-08	Down-regulated gene
SLC26A3|ENSG00000091138|protein_coding	-2.37259	4.0456	5.26638e-09	3.12577e-08	Down-regulated gene
PKIA|ENSG00000171033|protein_coding	-1.30968	2.37129	5.33124e-09	3.1599e-08	Down-regulated gene
SERP2|ENSG00000151778|protein_coding	-1.24176	0.921998	5.39481e-09	3.19657e-08	Down-regulated gene
SCN2B|ENSG00000149575|protein_coding	-1.6792	-0.113142	5.59369e-09	3.30812e-08	Down-regulated gene
EVPLL|ENSG00000214860|protein_coding	-1.93474	-2.46897	5.5981e-09	3.30969e-08	Down-regulated gene
GPIHBP1|ENSG00000277494|protein_coding	-1.3913	0.281047	5.65397e-09	3.34166e-08	Down-regulated gene
IL1A|ENSG00000115008|protein_coding	-1.77818	1.58628	5.67294e-09	3.35076e-08	Down-regulated gene
SPAG4|ENSG00000061656|protein_coding	-1.05674	2.91236	5.73133e-09	3.38311e-08	Down-regulated gene
SYNDIG1L|ENSG00000183379|protein_coding	-1.5323	-2.66202	5.84676e-09	3.4469e-08	Down-regulated gene
PLIN1|ENSG00000166819|protein_coding	-2.02896	1.90797	5.9e-09	3.47609e-08	Down-regulated gene
PACRG|ENSG00000112530|protein_coding	-1.42791	-0.309209	6.01313e-09	3.54052e-08	Down-regulated gene
CA2|ENSG00000104267|protein_coding	-1.70618	7.79727	6.12933e-09	3.60214e-08	Down-regulated gene
MAB21L2|ENSG00000181541|protein_coding	-1.92488	0.55751	6.13416e-09	3.60384e-08	Down-regulated gene
PLCXD1|ENSG00000182378|protein_coding	-1.00462	4.97445	6.27726e-09	3.68098e-08	Down-regulated gene
AGTR1|ENSG00000144891|protein_coding	-1.99913	1.62262	6.34898e-09	3.71838e-08	Down-regulated gene
PRKCB|ENSG00000166501|protein_coding	-1.35291	4.85709	6.48398e-09	3.79506e-08	Down-regulated gene
AKAP12|ENSG00000131016|protein_coding	-1.39823	6.23278	6.78307e-09	3.96268e-08	Down-regulated gene
C15orf52|ENSG00000188549|protein_coding	-1.29227	4.33631	6.8441e-09	3.99584e-08	Down-regulated gene
LTB4R|ENSG00000213903|protein_coding	-1.04366	2.9679	6.95077e-09	4.05054e-08	Down-regulated gene
MPDZ|ENSG00000107186|protein_coding	-1.18943	4.26716	7.06638e-09	4.11663e-08	Down-regulated gene
MUC15|ENSG00000169550|protein_coding	-2.88048	1.49283	7.08003e-09	4.1233e-08	Down-regulated gene
SMLR1|ENSG00000256162|protein_coding	-2.29629	0.373786	7.50253e-09	4.35445e-08	Down-regulated gene
SGCE|ENSG00000127990|protein_coding	-1.13651	4.18948	8.01573e-09	4.63362e-08	Down-regulated gene
TMPRSS11F|ENSG00000198092|protein_coding	-3.20428	-0.481689	8.5951e-09	4.95171e-08	Down-regulated gene
TMEM59L|ENSG00000105696|protein_coding	-1.60805	0.488317	8.65283e-09	4.98037e-08	Down-regulated gene
SUSD4|ENSG00000143502|protein_coding	-1.69476	3.1758	8.67328e-09	4.99061e-08	Down-regulated gene
PPP1R14D|ENSG00000166143|protein_coding	-1.61255	3.37082	8.86225e-09	5.08838e-08	Down-regulated gene
CDKN2B|ENSG00000147883|protein_coding	-1.1513	4.75412	9.06951e-09	5.19941e-08	Down-regulated gene
ADGRL3|ENSG00000150471|protein_coding	-1.28989	2.87081	9.17782e-09	5.25667e-08	Down-regulated gene
CDKL2|ENSG00000138769|protein_coding	-1.41236	0.424165	9.28219e-09	5.30995e-08	Down-regulated gene
CORO2B|ENSG00000103647|protein_coding	-1.2982	1.67209	9.62097e-09	5.49367e-08	Down-regulated gene
ENTPD3|ENSG00000168032|protein_coding	-1.62364	2.6317	9.84028e-09	5.61034e-08	Down-regulated gene
TLR3|ENSG00000164342|protein_coding	-1.001	4.07459	1.01795e-08	5.78964e-08	Down-regulated gene
ATP2B3|ENSG00000067842|protein_coding	-1.89489	-2.08645	1.04052e-08	5.91083e-08	Down-regulated gene
STON1-GTF2A1L|ENSG00000068781|protein_coding	-1.65266	-1.93715	1.0446e-08	5.9322e-08	Down-regulated gene
FBXO27|ENSG00000161243|protein_coding	-1.38289	2.21867	1.05327e-08	5.97782e-08	Down-regulated gene
SYT10|ENSG00000110975|protein_coding	-2.04647	-2.17549	1.1575e-08	6.53567e-08	Down-regulated gene
CLDN15|ENSG00000106404|protein_coding	-1.53999	5.4217	1.16469e-08	6.57226e-08	Down-regulated gene
FAM181B|ENSG00000182103|protein_coding	-1.67543	-0.681599	1.1728e-08	6.61608e-08	Down-regulated gene
ANO5|ENSG00000171714|protein_coding	-1.47164	2.99356	1.24142e-08	6.96538e-08	Down-regulated gene
SLC8A1|ENSG00000183023|protein_coding	-1.08267	4.40243	1.24855e-08	6.99904e-08	Down-regulated gene
CCDC110|ENSG00000168491|protein_coding	-1.2445	0.291321	1.25005e-08	7.00451e-08	Down-regulated gene
ANGPTL5|ENSG00000187151|protein_coding	-1.83538	-2.4259	1.27147e-08	7.11687e-08	Down-regulated gene
TMEM132C|ENSG00000181234|protein_coding	-1.94122	0.472749	1.27233e-08	7.11955e-08	Down-regulated gene
KCNH2|ENSG00000055118|protein_coding	-1.55763	4.76684	1.31316e-08	7.32922e-08	Down-regulated gene
UGT1A3|ENSG00000243135|protein_coding	-2.01518	-2.67863	1.31371e-08	7.32922e-08	Down-regulated gene
PGA4|ENSG00000229183|protein_coding	-4.1769	2.5346	1.32207e-08	7.37144e-08	Down-regulated gene
TUBB4A|ENSG00000104833|protein_coding	-1.68595	1.3182	1.334e-08	7.43355e-08	Down-regulated gene
C1orf116|ENSG00000182795|protein_coding	-1.12451	6.9923	1.33915e-08	7.45778e-08	Down-regulated gene
CHRM4|ENSG00000180720|protein_coding	-1.5489	-0.447761	1.34283e-08	7.47606e-08	Down-regulated gene
CYP4F12|ENSG00000186204|protein_coding	-1.37239	4.02155	1.34344e-08	7.47723e-08	Down-regulated gene
ABLIM3|ENSG00000173210|protein_coding	-1.13944	4.50205	1.46145e-08	8.11714e-08	Down-regulated gene
ANKRD65|ENSG00000235098|protein_coding	-1.31764	2.55388	1.46864e-08	8.15466e-08	Down-regulated gene
KRT73|ENSG00000186049|protein_coding	-2.22337	-3.68975	1.52624e-08	8.45693e-08	Down-regulated gene
KRT20|ENSG00000171431|protein_coding	-2.3418	7.05319	1.54065e-08	8.52918e-08	Down-regulated gene
ADTRP|ENSG00000111863|protein_coding	-1.64425	4.3265	1.58423e-08	8.75405e-08	Down-regulated gene
GADD45G|ENSG00000130222|protein_coding	-1.11218	2.84622	1.58454e-08	8.75405e-08	Down-regulated gene
EGR3|ENSG00000179388|protein_coding	-1.22738	4.04006	1.59195e-08	8.79049e-08	Down-regulated gene
MT1B|ENSG00000169688|protein_coding	-2.27077	-4.31104	1.79484e-08	9.86632e-08	Down-regulated gene
CHRNB4|ENSG00000117971|protein_coding	-1.3673	0.258122	1.92832e-08	1.05567e-07	Down-regulated gene
SLIT2|ENSG00000145147|protein_coding	-1.4638	3.99993	1.93494e-08	1.05867e-07	Down-regulated gene
ALDH3B2|ENSG00000132746|protein_coding	-2.0392	3.70543	2.03566e-08	1.10989e-07	Down-regulated gene
ANXA8|ENSG00000265190|protein_coding	-2.42937	2.28163	2.04502e-08	1.11466e-07	Down-regulated gene
FAM149A|ENSG00000109794|protein_coding	-1.10852	3.27291	2.05165e-08	1.11795e-07	Down-regulated gene
CES3|ENSG00000172828|protein_coding	-1.48315	4.4276	2.09946e-08	1.14262e-07	Down-regulated gene
RND2|ENSG00000108830|protein_coding	-1.46434	1.10856	2.13002e-08	1.15729e-07	Down-regulated gene
SYNC|ENSG00000162520|protein_coding	-1.48513	2.72513	2.19665e-08	1.19072e-07	Down-regulated gene
GLIPR1L2|ENSG00000180481|protein_coding	-1.06503	-0.849603	2.23772e-08	1.21193e-07	Down-regulated gene
CCL21|ENSG00000137077|protein_coding	-1.6303	5.5957	2.2775e-08	1.23312e-07	Down-regulated gene
INMT|ENSG00000241644|protein_coding	-1.33051	3.31554	2.3122e-08	1.25082e-07	Down-regulated gene
AVPR1A|ENSG00000166148|protein_coding	-1.16273	2.59781	2.35834e-08	1.27467e-07	Down-regulated gene
LAYN|ENSG00000204381|protein_coding	-1.13756	3.0881	2.37842e-08	1.28442e-07	Down-regulated gene
TMPRSS11A|ENSG00000187054|protein_coding	-3.25833	2.93653	2.40262e-08	1.29636e-07	Down-regulated gene
SFRP5|ENSG00000120057|protein_coding	-1.97579	2.37583	2.48444e-08	1.33897e-07	Down-regulated gene
CHST15|ENSG00000182022|protein_coding	-1.07658	5.56143	2.53836e-08	1.36684e-07	Down-regulated gene
AC004997.1|ENSG00000248751|protein_coding	-1.34253	-3.63379	2.54969e-08	1.37255e-07	Down-regulated gene
SLC8A2|ENSG00000118160|protein_coding	-1.90172	1.87513	2.55689e-08	1.37563e-07	Down-regulated gene
TMEM27|ENSG00000147003|protein_coding	-1.24372	0.438104	2.60192e-08	1.39705e-07	Down-regulated gene
RERGL|ENSG00000111404|protein_coding	-1.66239	0.568562	2.61655e-08	1.4041e-07	Down-regulated gene
PDE3A|ENSG00000172572|protein_coding	-1.28552	4.73842	2.64582e-08	1.41859e-07	Down-regulated gene
FGFBP1|ENSG00000137440|protein_coding	-2.16317	3.81177	2.65179e-08	1.42138e-07	Down-regulated gene
FLNC|ENSG00000128591|protein_coding	-1.87777	8.34343	2.76264e-08	1.47699e-07	Down-regulated gene
MYH7|ENSG00000092054|protein_coding	-1.64694	-1.93515	3.14874e-08	1.67005e-07	Down-regulated gene
ZNF454|ENSG00000178187|protein_coding	-1.10476	-0.407155	3.23268e-08	1.71117e-07	Down-regulated gene
ZNF385B|ENSG00000144331|protein_coding	-1.58203	1.67977	3.24085e-08	1.71501e-07	Down-regulated gene
TMC1|ENSG00000165091|protein_coding	-1.42271	-1.64827	3.47847e-08	1.83246e-07	Down-regulated gene
GPD1|ENSG00000167588|protein_coding	-1.57725	4.5548	3.60015e-08	1.8923e-07	Down-regulated gene
DCAF12L2|ENSG00000198354|protein_coding	-1.78371	-2.12522	3.67947e-08	1.93291e-07	Down-regulated gene
CU639417.1|ENSG00000275993|protein_coding	-1.08509	3.65734	3.92574e-08	2.05478e-07	Down-regulated gene
PCDH11Y|ENSG00000099715|protein_coding	-1.99744	-2.60756	3.95893e-08	2.07099e-07	Down-regulated gene
LILRB5|ENSG00000105609|protein_coding	-1.13575	2.37057	4.10199e-08	2.14224e-07	Down-regulated gene
SPAG16|ENSG00000144451|protein_coding	-1.0637	3.21592	4.18776e-08	2.18338e-07	Down-regulated gene
TOX|ENSG00000198846|protein_coding	-1.29532	4.15557	4.19107e-08	2.18388e-07	Down-regulated gene
LCE3E|ENSG00000185966|protein_coding	-3.6581	-1.0273	4.40796e-08	2.29371e-07	Down-regulated gene
REEP6|ENSG00000115255|protein_coding	-1.38386	5.51206	4.5279e-08	2.35024e-07	Down-regulated gene
MPIG6B|ENSG00000204420|protein_coding	-1.08941	-0.585893	4.55761e-08	2.36369e-07	Down-regulated gene
SNAP91|ENSG00000065609|protein_coding	-1.80751	-0.127853	4.56006e-08	2.36431e-07	Down-regulated gene
GPR22|ENSG00000172209|protein_coding	-1.34696	-2.3779	4.66889e-08	2.41738e-07	Down-regulated gene
CNTN3|ENSG00000113805|protein_coding	-1.64543	-0.209858	4.76086e-08	2.4616e-07	Down-regulated gene
GPR20|ENSG00000204882|protein_coding	-1.14839	0.138112	5.16146e-08	2.65406e-07	Down-regulated gene
TSHZ3|ENSG00000121297|protein_coding	-1.07112	3.92161	5.16916e-08	2.65729e-07	Down-regulated gene
ALK|ENSG00000171094|protein_coding	-1.50982	-1.20354	5.21321e-08	2.67846e-07	Down-regulated gene
CLUL1|ENSG00000079101|protein_coding	-1.36666	-0.970921	5.3287e-08	2.73105e-07	Down-regulated gene
NUGGC|ENSG00000189233|protein_coding	-1.36448	1.5861	5.36006e-08	2.74637e-07	Down-regulated gene
CYS1|ENSG00000205795|protein_coding	-1.48654	3.08037	5.37572e-08	2.75289e-07	Down-regulated gene
CNGA1|ENSG00000198515|protein_coding	-1.23831	1.66514	6.04402e-08	3.07995e-07	Down-regulated gene
CYP27A1|ENSG00000135929|protein_coding	-1.09031	5.09494	6.19977e-08	3.15074e-07	Down-regulated gene
PDE4C|ENSG00000105650|protein_coding	-1.32358	3.42917	6.35747e-08	3.22562e-07	Down-regulated gene
CD27|ENSG00000139193|protein_coding	-1.35967	3.2902	6.49422e-08	3.29322e-07	Down-regulated gene
FBLN1|ENSG00000077942|protein_coding	-1.32383	7.79732	6.6259e-08	3.35545e-07	Down-regulated gene
CASQ1|ENSG00000143318|protein_coding	-1.69783	-0.359456	6.97298e-08	3.52073e-07	Down-regulated gene
ADH1C|ENSG00000248144|protein_coding	-1.81948	6.3532	7.24784e-08	3.64574e-07	Down-regulated gene
ZNF677|ENSG00000197928|protein_coding	-1.08151	2.08941	7.69007e-08	3.85472e-07	Down-regulated gene
ZDHHC15|ENSG00000102383|protein_coding	-1.24016	0.547786	7.7352e-08	3.87526e-07	Down-regulated gene
RGS4|ENSG00000117152|protein_coding	-1.32966	3.24006	7.85904e-08	3.93309e-07	Down-regulated gene
NPY|ENSG00000122585|protein_coding	-2.10984	-0.107244	7.91812e-08	3.96054e-07	Down-regulated gene
NR2F1|ENSG00000175745|protein_coding	-1.08906	5.0056	8.17574e-08	4.08067e-07	Down-regulated gene
MFSD2A|ENSG00000168389|protein_coding	-1.06454	3.867	8.22162e-08	4.10029e-07	Down-regulated gene
TPSD1|ENSG00000095917|protein_coding	-1.76367	1.66013	8.26415e-08	4.1204e-07	Down-regulated gene
SLC17A7|ENSG00000104888|protein_coding	-1.35262	0.498783	8.28369e-08	4.12719e-07	Down-regulated gene
LRRC66|ENSG00000188993|protein_coding	-1.43964	3.04665	8.28438e-08	4.12719e-07	Down-regulated gene
PABPC5|ENSG00000174740|protein_coding	-1.12967	-0.0863543	8.41808e-08	4.19045e-07	Down-regulated gene
ITGB7|ENSG00000139626|protein_coding	-1.08291	2.71757	8.64886e-08	4.29961e-07	Down-regulated gene
NPAS3|ENSG00000151322|protein_coding	-1.27999	0.782968	8.82586e-08	4.38527e-07	Down-regulated gene
SSTR1|ENSG00000139874|protein_coding	-1.46993	4.50194	8.97482e-08	4.45574e-07	Down-regulated gene
VPREB1|ENSG00000169575|protein_coding	-2.19767	-4.07952	9.14019e-08	4.53303e-07	Down-regulated gene
GPR182|ENSG00000166856|protein_coding	-1.05536	-1.92335	9.17932e-08	4.55123e-07	Down-regulated gene
NRG4|ENSG00000169752|protein_coding	-1.49492	1.21484	9.18883e-08	4.55474e-07	Down-regulated gene
WASF1|ENSG00000112290|protein_coding	-1.06587	3.44786	9.42135e-08	4.65889e-07	Down-regulated gene
DES|ENSG00000175084|protein_coding	-2.13233	10.2624	9.51206e-08	4.70002e-07	Down-regulated gene
MAP1A|ENSG00000166963|protein_coding	-1.13931	5.26051	9.567e-08	4.72467e-07	Down-regulated gene
IL16|ENSG00000172349|protein_coding	-1.083	4.17052	9.654e-08	4.76386e-07	Down-regulated gene
GALNT17|ENSG00000185274|protein_coding	-1.21067	1.64863	9.67206e-08	4.77152e-07	Down-regulated gene
LY9|ENSG00000122224|protein_coding	-1.32423	2.42238	9.79924e-08	4.82916e-07	Down-regulated gene
RORB|ENSG00000198963|protein_coding	-1.27101	0.525552	9.90688e-08	4.87964e-07	Down-regulated gene
GRIA1|ENSG00000155511|protein_coding	-1.57416	-0.884852	1.01197e-07	4.98055e-07	Down-regulated gene
CMC4|ENSG00000182712|protein_coding	-1.25413	-3.21024	1.03637e-07	5.09519e-07	Down-regulated gene
NPC1L1|ENSG00000015520|protein_coding	-1.7859	4.91209	1.03687e-07	5.09519e-07	Down-regulated gene
PTGFR|ENSG00000122420|protein_coding	-1.30284	1.97575	1.0369e-07	5.09519e-07	Down-regulated gene
CPNE6|ENSG00000100884|protein_coding	-1.73798	0.332437	1.0443e-07	5.12752e-07	Down-regulated gene
KCNQ4|ENSG00000117013|protein_coding	-1.20944	2.47444	1.0467e-07	5.13794e-07	Down-regulated gene
DIRAS1|ENSG00000176490|protein_coding	-1.51747	1.53203	1.05128e-07	5.15636e-07	Down-regulated gene
C3orf70|ENSG00000187068|protein_coding	-1.31617	4.12332	1.06009e-07	5.19824e-07	Down-regulated gene
GCNT2|ENSG00000111846|protein_coding	-1.01251	3.46975	1.06892e-07	5.2374e-07	Down-regulated gene
PDE9A|ENSG00000160191|protein_coding	-1.19749	3.03611	1.12544e-07	5.49704e-07	Down-regulated gene
CCKAR|ENSG00000163394|protein_coding	-2.3482	0.504633	1.12822e-07	5.50918e-07	Down-regulated gene
HOXA2|ENSG00000105996|protein_coding	-1.16523	1.45783	1.14992e-07	5.60784e-07	Down-regulated gene
GPR87|ENSG00000138271|protein_coding	-2.3658	1.18778	1.15487e-07	5.62757e-07	Down-regulated gene
ELAVL4|ENSG00000162374|protein_coding	-1.48235	0.251428	1.1752e-07	5.71923e-07	Down-regulated gene
SYPL2|ENSG00000143028|protein_coding	-1.27921	1.1868	1.17924e-07	5.73586e-07	Down-regulated gene
RASGRP2|ENSG00000068831|protein_coding	-1.22676	3.12631	1.18579e-07	5.76626e-07	Down-regulated gene
NMRK2|ENSG00000077009|protein_coding	-1.94735	-2.31742	1.22164e-07	5.93284e-07	Down-regulated gene
SIX2|ENSG00000170577|protein_coding	-1.74504	3.73408	1.22644e-07	5.95462e-07	Down-regulated gene
KLK11|ENSG00000167757|protein_coding	-1.84007	5.04683	1.23606e-07	5.9998e-07	Down-regulated gene
C10orf142|ENSG00000277288|protein_coding	-1.54467	-3.97864	1.35642e-07	6.53655e-07	Down-regulated gene
EPS8L1|ENSG00000131037|protein_coding	-1.15653	5.87541	1.36761e-07	6.5825e-07	Down-regulated gene
GFRA3|ENSG00000146013|protein_coding	-1.67444	2.22969	1.39029e-07	6.68255e-07	Down-regulated gene
POU2AF1|ENSG00000110777|protein_coding	-1.45161	5.10417	1.40026e-07	6.72699e-07	Down-regulated gene
ADAD2|ENSG00000140955|protein_coding	-1.76527	-1.75543	1.43173e-07	6.86583e-07	Down-regulated gene
NTRK3|ENSG00000140538|protein_coding	-1.41985	0.916451	1.44754e-07	6.93455e-07	Down-regulated gene
HIF3A|ENSG00000124440|protein_coding	-1.66208	4.45746	1.46911e-07	7.0289e-07	Down-regulated gene
KLRF1|ENSG00000150045|protein_coding	-1.12283	-1.3582	1.51783e-07	7.24162e-07	Down-regulated gene
CD300LG|ENSG00000161649|protein_coding	-1.7303	-1.17716	1.53832e-07	7.32815e-07	Down-regulated gene
SYNPO2|ENSG00000172403|protein_coding	-1.83684	8.81674	1.58724e-07	7.55546e-07	Down-regulated gene
ZNF483|ENSG00000173258|protein_coding	-1.08518	0.946661	1.60748e-07	7.64204e-07	Down-regulated gene
KIF5A|ENSG00000155980|protein_coding	-1.41765	1.15943	1.63593e-07	7.76153e-07	Down-regulated gene
FAM124A|ENSG00000150510|protein_coding	-1.14847	3.14601	1.66266e-07	7.88036e-07	Down-regulated gene
ISL1|ENSG00000016082|protein_coding	-1.2258	2.4039	1.67915e-07	7.95385e-07	Down-regulated gene
NAT2|ENSG00000156006|protein_coding	-1.90794	1.48619	1.67944e-07	7.95385e-07	Down-regulated gene
BMP3|ENSG00000152785|protein_coding	-2.05875	2.81989	1.6817e-07	7.96256e-07	Down-regulated gene
CDO1|ENSG00000129596|protein_coding	-1.44567	0.959793	1.68854e-07	7.98279e-07	Down-regulated gene
IGSF10|ENSG00000152580|protein_coding	-1.44734	1.96151	1.71836e-07	8.11557e-07	Down-regulated gene
GOLGA8N|ENSG00000232653|protein_coding	-1.01112	-0.324552	1.77931e-07	8.38864e-07	Down-regulated gene
GAP43|ENSG00000172020|protein_coding	-1.52643	0.459872	1.86679e-07	8.78115e-07	Down-regulated gene
PLCXD3|ENSG00000182836|protein_coding	-1.7611	1.78534	1.92164e-07	9.02778e-07	Down-regulated gene
GNRHR|ENSG00000109163|protein_coding	-1.2494	-2.67431	1.92862e-07	9.05478e-07	Down-regulated gene
C16orf54|ENSG00000185905|protein_coding	-1.18465	2.36695	1.94021e-07	9.10591e-07	Down-regulated gene
GRIN2A|ENSG00000183454|protein_coding	-1.5971	2.47705	1.96735e-07	9.22402e-07	Down-regulated gene
HTR4|ENSG00000164270|protein_coding	-1.874	-1.06008	1.97468e-07	9.25375e-07	Down-regulated gene
LRRC52|ENSG00000162763|protein_coding	-2.33895	-4.37393	2.01447e-07	9.42132e-07	Down-regulated gene
GPR52|ENSG00000203737|protein_coding	-1.37469	-3.22079	2.0385e-07	9.52655e-07	Down-regulated gene
KRT6B|ENSG00000185479|protein_coding	-2.37175	5.93419	2.11736e-07	9.87537e-07	Down-regulated gene
AGMO|ENSG00000187546|protein_coding	-1.66038	1.88007	2.1217e-07	9.89069e-07	Down-regulated gene
ZCCHC24|ENSG00000165424|protein_coding	-1.08913	5.50627	2.12738e-07	9.91224e-07	Down-regulated gene
FAM13C|ENSG00000148541|protein_coding	-1.06017	2.1565	2.15927e-07	1.00558e-06	Down-regulated gene
TMEM71|ENSG00000165071|protein_coding	-1.0124	1.40067	2.2103e-07	1.02807e-06	Down-regulated gene
KL|ENSG00000133116|protein_coding	-1.15003	1.65916	2.38992e-07	1.10803e-06	Down-regulated gene
ADAMTS8|ENSG00000134917|protein_coding	-1.53693	3.04269	2.39524e-07	1.11022e-06	Down-regulated gene
FAM110B|ENSG00000169122|protein_coding	-1.12264	2.57436	2.401e-07	1.11262e-06	Down-regulated gene
PCP4|ENSG00000183036|protein_coding	-2.08662	1.5687	2.45818e-07	1.13686e-06	Down-regulated gene
AMER2|ENSG00000165566|protein_coding	-1.73607	-2.48213	2.5297e-07	1.16742e-06	Down-regulated gene
PTGES3L|ENSG00000267060|protein_coding	-1.09407	0.909323	2.52987e-07	1.16742e-06	Down-regulated gene
GLRB|ENSG00000109738|protein_coding	-1.20052	1.2625	2.67082e-07	1.22943e-06	Down-regulated gene
WDR17|ENSG00000150627|protein_coding	-1.45783	0.832814	2.67881e-07	1.2325e-06	Down-regulated gene
GRP|ENSG00000134443|protein_coding	-2.04478	0.206654	2.76762e-07	1.27055e-06	Down-regulated gene
IL12A|ENSG00000168811|protein_coding	-1.16551	-0.300924	2.81216e-07	1.28816e-06	Down-regulated gene
CAPN13|ENSG00000162949|protein_coding	-1.50174	3.11567	3.07647e-07	1.39929e-06	Down-regulated gene
CLU|ENSG00000120885|protein_coding	-1.25747	8.575	3.07908e-07	1.40014e-06	Down-regulated gene
SLC13A4|ENSG00000164707|protein_coding	-1.01016	0.9283	3.25011e-07	1.47397e-06	Down-regulated gene
C7|ENSG00000112936|protein_coding	-1.77499	6.17943	3.30986e-07	1.4978e-06	Down-regulated gene
GLI3|ENSG00000106571|protein_coding	-1.06126	3.7331	3.44401e-07	1.55588e-06	Down-regulated gene
ITGA9|ENSG00000144668|protein_coding	-1.06855	4.9788	3.48908e-07	1.57358e-06	Down-regulated gene
HTR3B|ENSG00000149305|protein_coding	-2.13798	-2.90142	3.49217e-07	1.57459e-06	Down-regulated gene
SLC28A2|ENSG00000137860|protein_coding	-2.05786	4.68716	3.57847e-07	1.61078e-06	Down-regulated gene
GPA33|ENSG00000143167|protein_coding	-1.74381	5.7224	3.6812e-07	1.65384e-06	Down-regulated gene
PALM|ENSG00000099864|protein_coding	-1.11052	4.36608	3.72473e-07	1.6718e-06	Down-regulated gene
GRIA3|ENSG00000125675|protein_coding	-1.16586	-0.543874	3.72921e-07	1.67341e-06	Down-regulated gene
RHOV|ENSG00000104140|protein_coding	-1.5335	3.38933	3.81179e-07	1.70841e-06	Down-regulated gene
LRRC19|ENSG00000184434|protein_coding	-1.60802	2.40263	3.88306e-07	1.73786e-06	Down-regulated gene
ADAMTS15|ENSG00000166106|protein_coding	-1.21485	2.8278	4.03138e-07	1.79831e-06	Down-regulated gene
S100A12|ENSG00000163221|protein_coding	-1.73573	1.36661	4.03159e-07	1.79831e-06	Down-regulated gene
IRX3|ENSG00000177508|protein_coding	-1.59136	2.59961	4.03678e-07	1.8002e-06	Down-regulated gene
TPSB2|ENSG00000197253|protein_coding	-1.29365	4.14159	4.15913e-07	1.85309e-06	Down-regulated gene
TMIGD2|ENSG00000167664|protein_coding	-1.18732	-0.305284	4.3088e-07	1.9142e-06	Down-regulated gene
DUSP21|ENSG00000189037|protein_coding	-2.16763	-4.11702	4.31079e-07	1.91463e-06	Down-regulated gene
S100A2|ENSG00000196754|protein_coding	-2.10741	5.64102	4.43094e-07	1.96566e-06	Down-regulated gene
LTC4S|ENSG00000213316|protein_coding	-1.09113	-3.05523	4.47915e-07	1.98564e-06	Down-regulated gene
SLAMF7|ENSG00000026751|protein_coding	-1.17174	5.01059	4.55727e-07	2.01693e-06	Down-regulated gene
SYNE1|ENSG00000131018|protein_coding	-1.00927	5.88902	4.64427e-07	2.05155e-06	Down-regulated gene
NPR3|ENSG00000113389|protein_coding	-1.43144	2.53609	4.67237e-07	2.0625e-06	Down-regulated gene
FAM83A|ENSG00000147689|protein_coding	-1.88643	4.41958	4.71676e-07	2.07964e-06	Down-regulated gene
FOLR2|ENSG00000165457|protein_coding	-1.13452	3.48815	4.79716e-07	2.11459e-06	Down-regulated gene
DAPP1|ENSG00000070190|protein_coding	-1.00461	3.48839	4.90034e-07	2.15753e-06	Down-regulated gene
SPRR1B|ENSG00000169469|protein_coding	-2.75562	6.41807	4.95636e-07	2.18066e-06	Down-regulated gene
JSRP1|ENSG00000167476|protein_coding	-1.34062	2.48315	4.99244e-07	2.1955e-06	Down-regulated gene
FMN2|ENSG00000155816|protein_coding	-1.56205	0.723611	5.03255e-07	2.21158e-06	Down-regulated gene
FAIM2|ENSG00000135472|protein_coding	-1.24314	2.55269	5.21609e-07	2.28687e-06	Down-regulated gene
CDH8|ENSG00000150394|protein_coding	-1.3157	-1.0288	5.60886e-07	2.4476e-06	Down-regulated gene
SULT2A1|ENSG00000105398|protein_coding	-2.35487	2.27728	5.78544e-07	2.52172e-06	Down-regulated gene
TM4SF5|ENSG00000142484|protein_coding	-1.34429	4.61841	5.86375e-07	2.55347e-06	Down-regulated gene
NRG3|ENSG00000185737|protein_coding	-1.60187	-0.650475	5.8872e-07	2.56308e-06	Down-regulated gene
SLITRK5|ENSG00000165300|protein_coding	-1.58574	1.35997	5.91873e-07	2.57621e-06	Down-regulated gene
HS3ST6|ENSG00000162040|protein_coding	-2.29299	0.483174	5.93355e-07	2.58146e-06	Down-regulated gene
DTNA|ENSG00000134769|protein_coding	-1.32744	3.37609	6.01723e-07	2.61483e-06	Down-regulated gene
BOC|ENSG00000144857|protein_coding	-1.28785	4.72296	6.06538e-07	2.63514e-06	Down-regulated gene
PCDH10|ENSG00000138650|protein_coding	-1.83392	1.39714	6.18584e-07	2.68373e-06	Down-regulated gene
FAM3D|ENSG00000198643|protein_coding	-1.49499	6.08453	6.21562e-07	2.69603e-06	Down-regulated gene
ZNF385D|ENSG00000151789|protein_coding	-1.19207	1.68661	6.23654e-07	2.70385e-06	Down-regulated gene
SSPN|ENSG00000123096|protein_coding	-1.00254	4.90642	6.3e-07	2.73073e-06	Down-regulated gene
NEU4|ENSG00000204099|protein_coding	-1.68683	1.54171	6.71045e-07	2.89589e-06	Down-regulated gene
SPRR2A|ENSG00000241794|protein_coding	-3.15674	5.81871	6.78309e-07	2.92387e-06	Down-regulated gene
ACOT12|ENSG00000172497|protein_coding	-1.55734	-3.37929	6.90717e-07	2.97667e-06	Down-regulated gene
TTLL7|ENSG00000137941|protein_coding	-1.26075	3.69563	7.27077e-07	3.12401e-06	Down-regulated gene
TSPAN7|ENSG00000156298|protein_coding	-1.12565	3.87914	7.30754e-07	3.13837e-06	Down-regulated gene
SST|ENSG00000157005|protein_coding	-2.41139	4.38628	7.41688e-07	3.18241e-06	Down-regulated gene
AL096711.2|ENSG00000255330|protein_coding	-1.27676	-1.97318	7.53772e-07	3.23129e-06	Down-regulated gene
SNURF|ENSG00000273173|protein_coding	-1.13285	-1.63088	7.62725e-07	3.26668e-06	Down-regulated gene
KCNE4|ENSG00000152049|protein_coding	-1.05056	3.41877	7.80427e-07	3.33979e-06	Down-regulated gene
CHST5|ENSG00000135702|protein_coding	-1.76373	2.61331	7.86357e-07	3.3625e-06	Down-regulated gene
SMAD9|ENSG00000120693|protein_coding	-1.22763	4.06261	7.89721e-07	3.37381e-06	Down-regulated gene
STOX2|ENSG00000173320|protein_coding	-1.05465	2.84975	8.13504e-07	3.46355e-06	Down-regulated gene
CLEC10A|ENSG00000132514|protein_coding	-1.2067	2.21837	8.22703e-07	3.49794e-06	Down-regulated gene
CXCL14|ENSG00000145824|protein_coding	-1.29201	6.823	8.42009e-07	3.57596e-06	Down-regulated gene
INA|ENSG00000148798|protein_coding	-1.66093	0.858943	8.42453e-07	3.57703e-06	Down-regulated gene
RIMS3|ENSG00000117016|protein_coding	-1.07238	2.55907	8.43614e-07	3.58081e-06	Down-regulated gene
BMPR1B|ENSG00000138696|protein_coding	-1.41227	2.23322	8.47445e-07	3.59496e-06	Down-regulated gene
SYT15|ENSG00000204176|protein_coding	-1.1037	-0.642333	8.68502e-07	3.67596e-06	Down-regulated gene
GPR12|ENSG00000132975|protein_coding	-1.83159	-3.02948	8.75367e-07	3.7025e-06	Down-regulated gene
CCL2|ENSG00000108691|protein_coding	-1.01944	5.27102	8.75762e-07	3.70333e-06	Down-regulated gene
PRKG2|ENSG00000138669|protein_coding	-1.20995	0.985341	8.7852e-07	3.71285e-06	Down-regulated gene
PDE7B|ENSG00000171408|protein_coding	-1.16043	2.76168	9.14373e-07	3.85528e-06	Down-regulated gene
TNFRSF8|ENSG00000120949|protein_coding	-1.00922	1.02137	9.42406e-07	3.96544e-06	Down-regulated gene
CTF1|ENSG00000150281|protein_coding	-1.17246	2.97303	9.48148e-07	3.98691e-06	Down-regulated gene
ANGPTL4|ENSG00000167772|protein_coding	-1.13516	3.72357	9.54288e-07	4.01183e-06	Down-regulated gene
ZNF835|ENSG00000127903|protein_coding	-1.1802	0.204392	9.656e-07	4.05665e-06	Down-regulated gene
HAS1|ENSG00000105509|protein_coding	-1.51929	0.498389	9.78821e-07	4.10758e-06	Down-regulated gene
FFAR1|ENSG00000126266|protein_coding	-1.74096	-3.4268	9.90718e-07	4.15006e-06	Down-regulated gene
ENPEP|ENSG00000138792|protein_coding	-1.07942	3.67852	9.99362e-07	4.18252e-06	Down-regulated gene
TAC1|ENSG00000006128|protein_coding	-2.2086	0.550863	1.00027e-06	4.18538e-06	Down-regulated gene
SRY|ENSG00000184895|protein_coding	-2.68526	-3.97641	1.0108e-06	4.22567e-06	Down-regulated gene
LMO1|ENSG00000166407|protein_coding	-2.07296	-0.119255	1.07955e-06	4.49501e-06	Down-regulated gene
TUSC5|ENSG00000184811|protein_coding	-2.13639	0.164128	1.08331e-06	4.50967e-06	Down-regulated gene
CXCL17|ENSG00000189377|protein_coding	-1.8693	6.75566	1.10542e-06	4.59554e-06	Down-regulated gene
KCNK3|ENSG00000171303|protein_coding	-1.57679	3.40369	1.14537e-06	4.74794e-06	Down-regulated gene
ARPP21|ENSG00000172995|protein_coding	-1.96466	-2.64876	1.14734e-06	4.75505e-06	Down-regulated gene
BAG2|ENSG00000112208|protein_coding	-1.07639	4.93954	1.14767e-06	4.75535e-06	Down-regulated gene
TSPAN18|ENSG00000157570|protein_coding	-1.0137	5.4699	1.15203e-06	4.77237e-06	Down-regulated gene
BPIFB6|ENSG00000167104|protein_coding	-2.46426	-3.80402	1.17156e-06	4.84793e-06	Down-regulated gene
SLC7A14|ENSG00000013293|protein_coding	-1.83617	-0.297676	1.17358e-06	4.85411e-06	Down-regulated gene
ETNK2|ENSG00000143845|protein_coding	-1.28169	2.76095	1.20961e-06	4.99543e-06	Down-regulated gene
MMEL1|ENSG00000142606|protein_coding	-1.05605	1.2436	1.24524e-06	5.13461e-06	Down-regulated gene
PRELP|ENSG00000188783|protein_coding	-1.402	6.28228	1.28674e-06	5.29058e-06	Down-regulated gene
CHD5|ENSG00000116254|protein_coding	-1.33946	0.91664	1.30529e-06	5.36451e-06	Down-regulated gene
SMPD3|ENSG00000103056|protein_coding	-1.12684	5.86573	1.37375e-06	5.61996e-06	Down-regulated gene
NMUR1|ENSG00000171596|protein_coding	-1.02846	1.1121	1.38974e-06	5.6804e-06	Down-regulated gene
UGT2B15|ENSG00000196620|protein_coding	-1.74488	3.03058	1.39365e-06	5.69512e-06	Down-regulated gene
KRT31|ENSG00000094796|protein_coding	-2.82422	-1.97274	1.42802e-06	5.82433e-06	Down-regulated gene
GDF10|ENSG00000266524|protein_coding	-1.62568	0.177916	1.43213e-06	5.83837e-06	Down-regulated gene
ASXL3|ENSG00000141431|protein_coding	-1.19902	0.559966	1.44354e-06	5.88101e-06	Down-regulated gene
TRIM55|ENSG00000147573|protein_coding	-1.51423	-1.80188	1.57726e-06	6.39379e-06	Down-regulated gene
MYEF2|ENSG00000104177|protein_coding	-1.30219	3.32522	1.60995e-06	6.51784e-06	Down-regulated gene
FMO5|ENSG00000131781|protein_coding	-1.09064	4.55077	1.64039e-06	6.63534e-06	Down-regulated gene
LY6D|ENSG00000167656|protein_coding	-2.31448	5.08825	1.74556e-06	7.04093e-06	Down-regulated gene
COLEC12|ENSG00000158270|protein_coding	-1.07847	3.71551	1.78519e-06	7.18838e-06	Down-regulated gene
TAS1R1|ENSG00000173662|protein_coding	-1.25292	-1.96217	1.80443e-06	7.26119e-06	Down-regulated gene
NXPE4|ENSG00000137634|protein_coding	-1.86035	-1.78077	1.85407e-06	7.44334e-06	Down-regulated gene
FGFR1|ENSG00000077782|protein_coding	-1.00014	6.08673	1.89731e-06	7.59898e-06	Down-regulated gene
RPS6KA6|ENSG00000072133|protein_coding	-1.42372	1.3035	1.89864e-06	7.60268e-06	Down-regulated gene
KCND3|ENSG00000171385|protein_coding	-1.04412	4.57942	1.91232e-06	7.6493e-06	Down-regulated gene
CNTFR|ENSG00000122756|protein_coding	-1.70959	2.55767	1.97773e-06	7.88733e-06	Down-regulated gene
BTNL2|ENSG00000204290|protein_coding	-1.5996	-3.36474	2.00678e-06	7.99634e-06	Down-regulated gene
UBE2Q2L|ENSG00000259511|protein_coding	-1.38852	-3.73353	2.03669e-06	8.10344e-06	Down-regulated gene
FUT9|ENSG00000172461|protein_coding	-1.88611	3.43092	2.10162e-06	8.33875e-06	Down-regulated gene
EFHC2|ENSG00000183690|protein_coding	-1.07525	1.01045	2.19313e-06	8.65411e-06	Down-regulated gene
SLITRK4|ENSG00000179542|protein_coding	-1.25729	0.030839	2.20881e-06	8.71233e-06	Down-regulated gene
MS4A2|ENSG00000149534|protein_coding	-1.13568	1.73573	2.33069e-06	9.15637e-06	Down-regulated gene
CYP2C19|ENSG00000165841|protein_coding	-1.46816	-1.10083	2.35151e-06	9.23431e-06	Down-regulated gene
GUCA2A|ENSG00000197273|protein_coding	-2.07065	0.986083	2.35659e-06	9.24845e-06	Down-regulated gene
CST11|ENSG00000125831|protein_coding	-1.78354	-3.84373	2.42574e-06	9.50786e-06	Down-regulated gene
NUDT11|ENSG00000196368|protein_coding	-1.13156	0.15203	2.43528e-06	9.54322e-06	Down-regulated gene
KCNIP3|ENSG00000115041|protein_coding	-1.11756	2.18273	2.45573e-06	9.6113e-06	Down-regulated gene
MPZ|ENSG00000158887|protein_coding	-1.41879	2.08586	2.48178e-06	9.70514e-06	Down-regulated gene
THRB|ENSG00000151090|protein_coding	-1.01363	4.43289	2.59711e-06	1.01265e-05	Down-regulated gene
HAPLN2|ENSG00000132702|protein_coding	-1.30108	-1.84868	2.61734e-06	1.0199e-05	Down-regulated gene
SLIT3|ENSG00000184347|protein_coding	-1.08933	5.5788	2.73976e-06	1.06362e-05	Down-regulated gene
KCNK16|ENSG00000095981|protein_coding	-2.44307	-1.61342	2.75012e-06	1.06676e-05	Down-regulated gene
B4GALNT2|ENSG00000167080|protein_coding	-1.89039	1.36236	2.76736e-06	1.073e-05	Down-regulated gene
NDST3|ENSG00000164100|protein_coding	-1.15637	-1.92326	2.76916e-06	1.07347e-05	Down-regulated gene
NAP1L3|ENSG00000186310|protein_coding	-1.08659	0.937441	2.93566e-06	1.1359e-05	Down-regulated gene
MSTN|ENSG00000138379|protein_coding	-1.18583	-1.81797	3.00984e-06	1.1634e-05	Down-regulated gene
DDR2|ENSG00000162733|protein_coding	-1.0356	6.05514	3.02667e-06	1.16918e-05	Down-regulated gene
CYTL1|ENSG00000170891|protein_coding	-1.06136	0.386818	3.04191e-06	1.17458e-05	Down-regulated gene
NR1H4|ENSG00000012504|protein_coding	-1.74876	1.38273	3.0777e-06	1.18693e-05	Down-regulated gene
OSR1|ENSG00000143867|protein_coding	-1.10097	2.03473	3.08925e-06	1.19114e-05	Down-regulated gene
C1QTNF3|ENSG00000082196|protein_coding	-1.19779	3.09947	3.09902e-06	1.19441e-05	Down-regulated gene
C10orf99|ENSG00000188373|protein_coding	-2.60229	2.37606	3.1321e-06	1.20543e-05	Down-regulated gene
ATRNL1|ENSG00000107518|protein_coding	-1.26303	0.645934	3.17125e-06	1.21999e-05	Down-regulated gene
LGALS7|ENSG00000205076|protein_coding	-2.45445	0.90525	3.23885e-06	1.24472e-05	Down-regulated gene
ABCA6|ENSG00000154262|protein_coding	-1.03226	2.457	3.27675e-06	1.25825e-05	Down-regulated gene
SNCA|ENSG00000145335|protein_coding	-1.0623	1.48993	3.34838e-06	1.2826e-05	Down-regulated gene
ACSM5|ENSG00000183549|protein_coding	-1.09093	-0.681313	3.40681e-06	1.30364e-05	Down-regulated gene
SCN4B|ENSG00000177098|protein_coding	-1.06414	2.18426	3.44893e-06	1.31922e-05	Down-regulated gene
POU3F1|ENSG00000185668|protein_coding	-1.34568	0.0271772	3.52174e-06	1.34487e-05	Down-regulated gene
KLHL10|ENSG00000161594|protein_coding	-1.32518	-2.37519	3.52566e-06	1.34609e-05	Down-regulated gene
WNT4|ENSG00000162552|protein_coding	-1.15654	2.95128	3.55863e-06	1.3573e-05	Down-regulated gene
FAM218A|ENSG00000250486|protein_coding	-1.24025	-1.38391	3.69625e-06	1.4075e-05	Down-regulated gene
EML5|ENSG00000165521|protein_coding	-1.06452	-0.191158	3.84314e-06	1.46045e-05	Down-regulated gene
MATN2|ENSG00000132561|protein_coding	-1.02635	5.62127	4.16778e-06	1.57678e-05	Down-regulated gene
FSIP2|ENSG00000188738|protein_coding	-1.29164	2.2232	4.18683e-06	1.58366e-05	Down-regulated gene
EPHX3|ENSG00000105131|protein_coding	-1.51005	3.26435	4.24132e-06	1.60201e-05	Down-regulated gene
TMEM63C|ENSG00000165548|protein_coding	-1.46687	1.5702	4.27546e-06	1.61328e-05	Down-regulated gene
BMP5|ENSG00000112175|protein_coding	-1.53377	0.654177	4.28297e-06	1.61579e-05	Down-regulated gene
TMEM150B|ENSG00000180061|protein_coding	-1.11458	3.48698	4.30244e-06	1.62215e-05	Down-regulated gene
CLEC9A|ENSG00000197992|protein_coding	-1.08008	-1.26796	4.35083e-06	1.63775e-05	Down-regulated gene
TIMP4|ENSG00000157150|protein_coding	-1.14977	1.40965	4.6407e-06	1.73882e-05	Down-regulated gene
ATP13A5|ENSG00000187527|protein_coding	-1.64127	-1.95286	4.67845e-06	1.75051e-05	Down-regulated gene
CCDC160|ENSG00000203952|protein_coding	-1.3451	-1.4773	4.93012e-06	1.8377e-05	Down-regulated gene
SPRR2D|ENSG00000163216|protein_coding	-2.75021	4.1694	5.1063e-06	1.89619e-05	Down-regulated gene
NRTN|ENSG00000171119|protein_coding	-1.00414	1.97947	5.38852e-06	1.99387e-05	Down-regulated gene
GGT6|ENSG00000167741|protein_coding	-1.46537	4.96567	5.46997e-06	2.02214e-05	Down-regulated gene
NANOS1|ENSG00000188613|protein_coding	-1.00097	1.00458	5.47027e-06	2.02214e-05	Down-regulated gene
ABCC9|ENSG00000069431|protein_coding	-1.12592	4.50792	5.53194e-06	2.04158e-05	Down-regulated gene
MMP28|ENSG00000271447|protein_coding	-1.06432	4.08544	5.53828e-06	2.04286e-05	Down-regulated gene
DYNLRB2|ENSG00000168589|protein_coding	-1.18864	-2.64065	5.54856e-06	2.04621e-05	Down-regulated gene
PCDHA3|ENSG00000255408|protein_coding	-1.22209	-1.27097	5.64872e-06	2.08192e-05	Down-regulated gene
RTL3|ENSG00000179300|protein_coding	-1.53546	-1.58093	5.72669e-06	2.10733e-05	Down-regulated gene
FO681492.1|ENSG00000277758|protein_coding	-1.10027	-1.13945	5.73425e-06	2.1096e-05	Down-regulated gene
PTGIS|ENSG00000124212|protein_coding	-1.29076	5.62221	5.86612e-06	2.15567e-05	Down-regulated gene
CLIC6|ENSG00000159212|protein_coding	-1.33443	4.9086	5.9946e-06	2.19857e-05	Down-regulated gene
TBX5|ENSG00000089225|protein_coding	-1.85028	-0.247242	6.08419e-06	2.22968e-05	Down-regulated gene
PODN|ENSG00000174348|protein_coding	-1.07193	6.02751	6.19698e-06	2.26746e-05	Down-regulated gene
LRRC2|ENSG00000163827|protein_coding	-1.10079	1.31434	6.23793e-06	2.28133e-05	Down-regulated gene
UGT1A10|ENSG00000242515|protein_coding	-1.63328	3.41351	6.23853e-06	2.28133e-05	Down-regulated gene
LCE3A|ENSG00000185962|protein_coding	-3.1845	-3.42491	6.26379e-06	2.28922e-05	Down-regulated gene
CTSG|ENSG00000100448|protein_coding	-1.58947	0.756649	6.3035e-06	2.30238e-05	Down-regulated gene
IL1RAPL1|ENSG00000169306|protein_coding	-1.22446	-1.25823	6.41635e-06	2.33949e-05	Down-regulated gene
ACSM6|ENSG00000173124|protein_coding	-1.25571	-2.29293	6.4575e-06	2.35358e-05	Down-regulated gene
HEPACAM|ENSG00000165478|protein_coding	-1.52483	-2.19941	6.46694e-06	2.35656e-05	Down-regulated gene
TMEM151B|ENSG00000178233|protein_coding	-1.19407	-1.03586	6.65335e-06	2.41974e-05	Down-regulated gene
PDZD3|ENSG00000172367|protein_coding	-1.21755	1.79514	6.82414e-06	2.4742e-05	Down-regulated gene
CYP4F11|ENSG00000171903|protein_coding	-1.30515	3.77253	6.90705e-06	2.50232e-05	Down-regulated gene
KRT24|ENSG00000167916|protein_coding	-2.46922	0.668213	7.17755e-06	2.59429e-05	Down-regulated gene
ACKR4|ENSG00000129048|protein_coding	-1.10904	2.65207	7.28941e-06	2.63116e-05	Down-regulated gene
SULT1C3|ENSG00000196228|protein_coding	-1.78322	-0.855297	7.50118e-06	2.70135e-05	Down-regulated gene
SNTG2|ENSG00000172554|protein_coding	-1.23038	-1.54093	7.65114e-06	2.75218e-05	Down-regulated gene
MADCAM1|ENSG00000099866|protein_coding	-1.28539	2.00997	7.70198e-06	2.76834e-05	Down-regulated gene
AC004691.2|ENSG00000250424|protein_coding	-1.33675	-3.8081	7.73308e-06	2.77898e-05	Down-regulated gene
HS6ST3|ENSG00000185352|protein_coding	-1.5756	0.800788	8.02106e-06	2.87529e-05	Down-regulated gene
CPA3|ENSG00000163751|protein_coding	-1.11882	4.22517	8.14254e-06	2.91437e-05	Down-regulated gene
AC011498.4|ENSG00000267385|protein_coding	-1.10473	-2.26201	8.27345e-06	2.95783e-05	Down-regulated gene
PTGDS|ENSG00000107317|protein_coding	-1.18505	5.76821	8.29156e-06	2.96374e-05	Down-regulated gene
CLVS2|ENSG00000146352|protein_coding	-1.97709	-0.582419	8.3385e-06	2.97938e-05	Down-regulated gene
MAP1LC3C|ENSG00000197769|protein_coding	-1.12029	-1.72183	8.47038e-06	3.02477e-05	Down-regulated gene
FCRL5|ENSG00000143297|protein_coding	-1.22237	3.19692	8.94331e-06	3.17969e-05	Down-regulated gene
C1QTNF9|ENSG00000240654|protein_coding	-1.20059	-1.97105	9.1137e-06	3.23597e-05	Down-regulated gene
HHLA2|ENSG00000114455|protein_coding	-1.38298	4.71958	9.27375e-06	3.28843e-05	Down-regulated gene
GPR62|ENSG00000180929|protein_coding	-1.07875	-2.1203	9.56785e-06	3.38438e-05	Down-regulated gene
CCDC178|ENSG00000166960|protein_coding	-1.16302	-1.51478	9.73882e-06	3.44095e-05	Down-regulated gene
KLHL30|ENSG00000168427|protein_coding	-1.01695	0.154303	9.85022e-06	3.47637e-05	Down-regulated gene
GSTM1|ENSG00000134184|protein_coding	-1.73717	3.84207	1.03876e-05	3.64951e-05	Down-regulated gene
HFM1|ENSG00000162669|protein_coding	-1.18817	-0.933858	1.05985e-05	3.71523e-05	Down-regulated gene
DCAF12L1|ENSG00000198889|protein_coding	-2.08796	-2.53981	1.07985e-05	3.78181e-05	Down-regulated gene
MIXL1|ENSG00000185155|protein_coding	-1.15703	0.329398	1.0855e-05	3.79873e-05	Down-regulated gene
LCN10|ENSG00000187922|protein_coding	-1.40172	-2.00866	1.10576e-05	3.86097e-05	Down-regulated gene
CHAT|ENSG00000070748|protein_coding	-1.80052	-2.98402	1.12939e-05	3.93834e-05	Down-regulated gene
AS3MT|ENSG00000214435|protein_coding	-1.22142	-1.40894	1.132e-05	3.94524e-05	Down-regulated gene
ADCY2|ENSG00000078295|protein_coding	-1.23404	2.33724	1.14444e-05	3.98635e-05	Down-regulated gene
SLC6A13|ENSG00000010379|protein_coding	-1.28205	-2.30078	1.14525e-05	3.98845e-05	Down-regulated gene
PIGR|ENSG00000162896|protein_coding	-1.52372	10.761	1.16394e-05	4.04601e-05	Down-regulated gene
TRPV3|ENSG00000167723|protein_coding	-1.08482	1.90725	1.18432e-05	4.11304e-05	Down-regulated gene
PDZK1|ENSG00000174827|protein_coding	-1.27176	1.94312	1.23484e-05	4.27737e-05	Down-regulated gene
HOMER2|ENSG00000103942|protein_coding	-1.20704	4.121	1.27308e-05	4.40167e-05	Down-regulated gene
UNC13C|ENSG00000137766|protein_coding	-1.54181	-1.08981	1.28756e-05	4.44436e-05	Down-regulated gene
LRRC4C|ENSG00000148948|protein_coding	-1.15211	-0.0860224	1.30656e-05	4.50579e-05	Down-regulated gene
IGLL1|ENSG00000128322|protein_coding	-1.69567	1.29121	1.31284e-05	4.52492e-05	Down-regulated gene
EPN3|ENSG00000049283|protein_coding	-1.0021	5.52353	1.37062e-05	4.71279e-05	Down-regulated gene
TWIST2|ENSG00000233608|protein_coding	-1.02931	2.16608	1.45811e-05	4.98706e-05	Down-regulated gene
SLC3A1|ENSG00000138079|protein_coding	-1.46383	3.89475	1.48655e-05	5.07691e-05	Down-regulated gene
FGF14|ENSG00000102466|protein_coding	-1.15298	1.21483	1.52915e-05	5.21001e-05	Down-regulated gene
CERS4|ENSG00000090661|protein_coding	-1.06394	4.08578	1.53769e-05	5.23431e-05	Down-regulated gene
HRNR|ENSG00000197915|protein_coding	-1.24634	-2.07733	1.579e-05	5.36523e-05	Down-regulated gene
PPP2R2C|ENSG00000074211|protein_coding	-1.60193	2.86211	1.58044e-05	5.36915e-05	Down-regulated gene
CNR1|ENSG00000118432|protein_coding	-1.39702	2.43631	1.60618e-05	5.45064e-05	Down-regulated gene
DPP4|ENSG00000197635|protein_coding	-1.12974	5.62304	1.64895e-05	5.58767e-05	Down-regulated gene
DMKN|ENSG00000161249|protein_coding	-1.29743	4.83893	1.65339e-05	5.59967e-05	Down-regulated gene
TM4SF20|ENSG00000168955|protein_coding	-1.70527	5.35227	1.66263e-05	5.62588e-05	Down-regulated gene
RASL11B|ENSG00000128045|protein_coding	-1.05993	1.61325	1.69628e-05	5.7273e-05	Down-regulated gene
FGF10|ENSG00000070193|protein_coding	-1.33324	1.72443	1.71221e-05	5.77797e-05	Down-regulated gene
PTPRZ1|ENSG00000106278|protein_coding	-1.36865	3.21299	1.71261e-05	5.77829e-05	Down-regulated gene
DUSP13|ENSG00000079393|protein_coding	-1.67221	-2.76073	1.71323e-05	5.77934e-05	Down-regulated gene
PLD5|ENSG00000180287|protein_coding	-1.60793	-0.737031	1.72315e-05	5.81071e-05	Down-regulated gene
SYT16|ENSG00000139973|protein_coding	-1.42801	-0.10368	1.7903e-05	6.02196e-05	Down-regulated gene
CFAP221|ENSG00000163075|protein_coding	-1.30809	1.85962	1.79553e-05	6.03737e-05	Down-regulated gene
STUM|ENSG00000203685|protein_coding	-1.37225	2.4181	1.85516e-05	6.22555e-05	Down-regulated gene
RIMS1|ENSG00000079841|protein_coding	-1.41705	1.14584	1.87927e-05	6.29294e-05	Down-regulated gene
ZMAT4|ENSG00000165061|protein_coding	-1.6573	-2.40435	1.88444e-05	6.30799e-05	Down-regulated gene
MKX|ENSG00000150051|protein_coding	-1.19967	1.84702	1.90126e-05	6.35746e-05	Down-regulated gene
EPHA5|ENSG00000145242|protein_coding	-1.2831	-1.48017	1.91143e-05	6.38578e-05	Down-regulated gene
CDA|ENSG00000158825|protein_coding	-1.26365	4.39142	1.94343e-05	6.48225e-05	Down-regulated gene
TUNAR|ENSG00000250366|protein_coding	-1.63532	-2.52282	1.95041e-05	6.5009e-05	Down-regulated gene
GCSAML|ENSG00000169224|protein_coding	-1.03153	-0.699217	1.97005e-05	6.56171e-05	Down-regulated gene
TMC3|ENSG00000188869|protein_coding	-1.12131	-1.44457	2.02805e-05	6.74047e-05	Down-regulated gene
DPY19L2|ENSG00000177990|protein_coding	-1.05971	0.913092	2.03705e-05	6.76557e-05	Down-regulated gene
LCE3D|ENSG00000163202|protein_coding	-2.96024	0.374246	2.11553e-05	7.00138e-05	Down-regulated gene
GLYAT|ENSG00000149124|protein_coding	-1.64981	-3.48033	2.23504e-05	7.36951e-05	Down-regulated gene
TSHB|ENSG00000134200|protein_coding	-1.51355	-3.83741	2.33991e-05	7.68821e-05	Down-regulated gene
PCDH19|ENSG00000165194|protein_coding	-1.12732	1.14545	2.38634e-05	7.83116e-05	Down-regulated gene
CCL11|ENSG00000172156|protein_coding	-1.06559	3.8857	2.39662e-05	7.86212e-05	Down-regulated gene
SIT1|ENSG00000137078|protein_coding	-1.04113	2.34611	2.43515e-05	7.97917e-05	Down-regulated gene
CCBE1|ENSG00000183287|protein_coding	-1.08578	0.980927	2.52084e-05	8.23067e-05	Down-regulated gene
TEPP|ENSG00000159648|protein_coding	-1.22117	-2.42459	2.6417e-05	8.59677e-05	Down-regulated gene
SNCB|ENSG00000074317|protein_coding	-1.30398	-2.49819	2.73699e-05	8.87909e-05	Down-regulated gene
FCRL4|ENSG00000163518|protein_coding	-1.34924	-0.695589	2.96468e-05	9.53345e-05	Down-regulated gene
RGS11|ENSG00000076344|protein_coding	-1.01845	1.82113	3.01841e-05	9.69056e-05	Down-regulated gene
DIRAS3|ENSG00000162595|protein_coding	-1.03592	1.25114	3.04715e-05	9.77346e-05	Down-regulated gene
CD1A|ENSG00000158477|protein_coding	-1.09791	0.0730229	3.13227e-05	0.00010019	Down-regulated gene
OR5K2|ENSG00000231861|protein_coding	-1.33362	-3.92137	3.30914e-05	0.000105397	Down-regulated gene
F13A1|ENSG00000124491|protein_coding	-1.15718	4.7145	3.34726e-05	0.000106466	Down-regulated gene
ATP13A4|ENSG00000127249|protein_coding	-1.33969	2.68975	3.43402e-05	0.000108966	Down-regulated gene
CARD17|ENSG00000255221|protein_coding	-1.10981	-2.24789	3.4416e-05	0.000109151	Down-regulated gene
ARHGDIG|ENSG00000242173|protein_coding	-1.4393	1.35663	3.45367e-05	0.000109497	Down-regulated gene
HPGDS|ENSG00000163106|protein_coding	-1.0156	1.00127	3.48065e-05	0.000110313	Down-regulated gene
IL6|ENSG00000136244|protein_coding	-1.24746	3.177	3.56845e-05	0.000112906	Down-regulated gene
PGLYRP4|ENSG00000163218|protein_coding	-1.62564	-0.594258	3.59488e-05	0.000113685	Down-regulated gene
GAMT|ENSG00000130005|protein_coding	-1.08772	3.1535	3.71694e-05	0.000117248	Down-regulated gene
NCR2|ENSG00000096264|protein_coding	-1.48906	-3.21686	3.9564e-05	0.000124111	Down-regulated gene
SIGLEC6|ENSG00000105492|protein_coding	-1.07381	0.5658	3.99289e-05	0.000125109	Down-regulated gene
RSPO1|ENSG00000169218|protein_coding	-1.23484	0.370233	4.06131e-05	0.000127104	Down-regulated gene
CNTNAP3B|ENSG00000154529|protein_coding	-1.13417	0.362156	4.09073e-05	0.000127939	Down-regulated gene
FCN1|ENSG00000085265|protein_coding	-1.01357	2.21689	4.10637e-05	0.000128406	Down-regulated gene
INSC|ENSG00000188487|protein_coding	-1.06044	0.712525	4.12916e-05	0.000129022	Down-regulated gene
FAM92B|ENSG00000153789|protein_coding	-1.18183	-1.65511	4.13021e-05	0.000129022	Down-regulated gene
KLHL4|ENSG00000102271|protein_coding	-1.07935	0.53335	4.21458e-05	0.000131417	Down-regulated gene
COL6A5|ENSG00000172752|protein_coding	-1.16588	0.028581	4.28794e-05	0.000133482	Down-regulated gene
UGT2A3|ENSG00000135220|protein_coding	-1.68959	4.35281	4.34326e-05	0.000135066	Down-regulated gene
LHCGR|ENSG00000138039|protein_coding	-1.35821	-2.61074	4.4211e-05	0.000137239	Down-regulated gene
WDR49|ENSG00000174776|protein_coding	-1.29846	-1.734	4.50956e-05	0.000139661	Down-regulated gene
FOLH1|ENSG00000086205|protein_coding	-1.1404	2.3184	4.61645e-05	0.000142664	Down-regulated gene
SLC6A15|ENSG00000072041|protein_coding	-1.72846	-0.121194	4.69223e-05	0.000144637	Down-regulated gene
XCL2|ENSG00000143185|protein_coding	-1.0037	-0.462378	4.75698e-05	0.000146402	Down-regulated gene
HOXC5|ENSG00000172789|protein_coding	-1.12994	-0.827888	4.87671e-05	0.000149767	Down-regulated gene
ANXA10|ENSG00000109511|protein_coding	-1.50944	6.54509	4.93798e-05	0.000151549	Down-regulated gene
ACMSD|ENSG00000153086|protein_coding	-1.31203	-0.0846865	5.17123e-05	0.000158189	Down-regulated gene
KLHL13|ENSG00000003096|protein_coding	-1.02052	2.67092	5.283e-05	0.000161344	Down-regulated gene
[truncated: 2,625 more rows]
