# Supplementary material for: Identification of Potential Key Genes Associated With the Pathogenesis and Prognosis of Gastric Cancer Based on Integrated Bioinformatics Analysis
Source: Front Genet. 2018 Jul 17;9:265. doi: 10.3389/fgene.2018.00265 (PMC6056647; doi:10.3389/fgene.2018.00265)
Supplement: Supplementary file 6 [file Table_6.XLSX]

## Sheet: Sheet1
TABLE S6 KEGG pathway enrichment analysis of the overlapping DEGs.
Group	KEGG ID	KEGG pathway	Class	Rich factor	Gene ratio	Background ratio	P value	adjust P value	Q value	Gene ID (Entrez ID)	Count
Down-regulated DEGs	hsa00982	Drug metabolism - cytochrome P450	Metabolism; Xenobiotics biodegradation and metabolism	0.142857	10/80	70/7386	2.93241e-09	2.43626e-07	1.9976e-07	4128/1559/1557/2940/2938/2330/7366/131/126/218	10
Down-regulated DEGs	hsa00980	Metabolism of xenobiotics by cytochrome P450	Metabolism; Xenobiotics biodegradation and metabolism	0.135135	10/80	74/7386	5.12898e-09	2.43626e-07	1.9976e-07	1559/1645/2940/2938/7366/22977/6822/131/126/218	10
Down-regulated DEGs	hsa05204	Chemical carcinogenesis	Human Diseases; Cancers	0.121951	10/80	82/7386	1.42471e-08	4.51157e-07	3.69924e-07	1559/1557/2940/2938/7366/1562/6822/131/126/218	10
Down-regulated DEGs	hsa04971	Gastric acid secretion	Organismal Systems; Digestive system	0.12	9/80	75/7386	9.13795e-08	2.17026e-06	1.7795e-06	115111/3772/887/760/3773/6750/9992/496/495	9
Down-regulated DEGs	hsa00830	Retinol metabolism	Metabolism; Metabolism of cofactors and vitamins	0.0923077	6/80	65/7386	6.63514e-05	0.00126068	0.00103368	1559/7366/1562/145226/131/126	6
Down-regulated DEGs	hsa04978	Mineral absorption	Organismal Systems; Digestive system	0.0980392	5/80	51/7386	0.000209021	0.0033095	0.00271361	4501/4496/4493/4495/4499	5
Down-regulated DEGs	hsa00350	Tyrosine metabolism	Metabolism; Amino acid metabolism	0.111111	4/80	36/7386	0.000577651	0.00783955	0.00642799	4128/131/126/218	4
Down-regulated DEGs	hsa00010	Glycolysis / Gluconeogenesis	Metabolism; Carbohydrate metabolism	0.0735294	5/80	68/7386	0.000803599	0.00954274	0.00782452	229/131/126/218/8789	5
Down-regulated DEGs	hsa00340	Histidine metabolism	Metabolism; Amino acid metabolism	0.130435	3/80	23/7386	0.00185373	0.0191306	0.0156861	4128/3067/218	3
Down-regulated DEGs	hsa00330	Arginine and proline metabolism	Metabolism; Amino acid metabolism	0.08	4/80	50/7386	0.00201375	0.0191306	0.0156861	4128/1152/1160/1158	4
Down-regulated DEGs	hsa04966	Collecting duct acid secretion	Organismal Systems; Excretory system	0.111111	3/80	27/7386	0.00296783	0.0256312	0.0210162	760/496/495	3
Down-regulated DEGs	hsa00051	Fructose and mannose metabolism	Metabolism; Carbohydrate metabolism	0.0909091	3/80	33/7386	0.00528397	0.0418314	0.0342994	229/57016/8789	3
Up-regulated DEGs	hsa04974	Protein digestion and absorption	Organismal Systems; Digestive system	0.0777778	7/56	90/7386	4.5006e-06	0.000454561	0.000360048	1300/1278/1277/1301/1290/1303/1282	7
Up-regulated DEGs	hsa04060	Cytokine-cytokine receptor interaction	Environmental Information Processing; Signaling molecules and interaction	0.037037	10/56	270/7386	2.9001e-05	0.00109273	0.000865528	3624/3576/4982/2919/6362/3627/4283/3976/5159/7292	10
Up-regulated DEGs	hsa04512	ECM-receptor interaction	Environmental Information Processing; Signaling molecules and interaction	0.0731707	6/56	82/7386	3.24573e-05	0.00109273	0.000865528	7058/6696/1278/1277/1311/1282	6
Up-regulated DEGs	hsa04933	AGE-RAGE signaling pathway in diabetic complications	Human Diseases; Endocrine and metabolic diseases	0.0606061	6/56	99/7386	9.40822e-05	0.00237557	0.00188164	1278/1277/3576/50507/1282/5054	6
Up-regulated DEGs	hsa04657	IL-17 signaling pathway	Organismal Systems; Immune system	0.0537634	5/56	93/7386	0.00065371	0.0109037	0.00863661	3576/2919/3627/4314/4312	5
Up-regulated DEGs	hsa04510	Focal adhesion	Cellular Processes; Cellular community - eukaryotes	0.0351759	7/56	199/7386	0.000702331	0.0109037	0.00863661	7058/6696/1278/1277/1311/1282/5159	7
Up-regulated DEGs	hsa05146	Amoebiasis	Human Diseases; Infectious diseases	0.0520833	5/56	96/7386	0.000755703	0.0109037	0.00863661	1278/1277/3576/2919/1282	5
Up-regulated DEGs	hsa04115	p53 signaling pathway	Cellular Processes; Cell growth and death	0.0588235	4/56	68/7386	0.00168401	0.0212606	0.0168401	5054/9133/983/891	4
Up-regulated DEGs	hsa05165	Human papillomavirus infection	Human Diseases; Infectious diseases	0.0250784	8/56	319/7386	0.00257417	0.0288879	0.0228815	7058/6696/1278/1277/1311/7472/1282/5159	8
Up-regulated DEGs	hsa05323	Rheumatoid arthritis	Human Diseases; Immune diseases	0.0444444	4/56	90/7386	0.00467198	0.047187	0.0373759	3576/2919/4314/4312	4
