# Supplementary material for: Identification of Potential Key Genes Associated With the Pathogenesis and Prognosis of Gastric Cancer Based on Integrated Bioinformatics Analysis
Source: Front Genet. 2018 Jul 17;9:265. doi: 10.3389/fgene.2018.00265 (PMC6056647; doi:10.3389/fgene.2018.00265)
Supplement: Supplementary file 9 [file Table_9.XLSX]

## Sheet: Sheet1
TABLE S9 GO enrichment analysis of the DEGs in the three modules.
Group	Category	GO ID	GO term	Rich factor	Count	%	P value	Gene ID (Ensembl ID)	List total	Pop hits	Pop total	Fold enrichment	Bonferroni	Benjamini	FDR
Module 1	Cellular component	GO:0030496	midbody	0.0697674	9	39.1304	1.48907e-12	ENSG00000170312, ENSG00000118193, ENSG00000117724, ENSG00000090889, ENSG00000114346, ENSG00000138180, ENSG00000066279, ENSG00000112984, ENSG00000198901	23	129	18224	55.2801	9.97651e-11	9.97651e-11	1.5272e-09
Module 1	Biological process	GO:0007067	mitotic nuclear division	0.0403226	10	43.4783	1.21682e-11	ENSG00000170312, ENSG00000143228, ENSG00000117724, ENSG00000168078, ENSG00000088325, ENSG00000138180, ENSG00000066279, ENSG00000080986, ENSG00000011426, ENSG00000157456	23	248	16792	29.439	2.95689e-09	2.95689e-09	1.57371e-08
Module 1	Biological process	GO:0051301	cell division	0.0257143	9	39.1304	8.15245e-09	ENSG00000170312, ENSG00000118193, ENSG00000143228, ENSG00000117724, ENSG00000088325, ENSG00000123975, ENSG00000080986, ENSG00000134057, ENSG00000157456	23	350	16792	18.7737	1.98104e-06	9.90522e-07	1.05435e-05
Module 1	Biological process	GO:0000281	mitotic cytokinesis	0.137931	4	17.3913	6.97628e-06	ENSG00000090889, ENSG00000138180, ENSG00000011426, ENSG00000112984	23	29	16792	100.702	0.00169381	0.000564921	0.00902198
Module 1	Cellular component	GO:0005813	centrosome	0.0164319	7	30.4348	8.55307e-06	ENSG00000170312, ENSG00000117724, ENSG00000138180, ENSG00000134057, ENSG00000123473, ENSG00000143476, ENSG00000157456	23	426	18224	13.0198	0.000572894	0.000286488	0.00877195
Module 1	Cellular component	GO:0005634	nucleus	0.00313943	17	73.913	3.83786e-05	ENSG00000118193, ENSG00000131747, ENSG00000117724, ENSG00000114346, ENSG00000168078, ENSG00000071539, ENSG00000066279, ENSG00000080986, ENSG00000134057, ENSG00000126787, ENSG00000143476, ENSG00000170312, ENSG00000143228, ENSG00000100526, ENSG00000088325, ENSG00000198901, ENSG00000157456	23	5415	18224	2.48752	0.00256811	0.000856772	0.0393553
Module 2	Cellular component	GO:0005788	endoplasmic reticulum lumen	0.0520833	10	90.9091	1.3247e-18	ENSG00000123500, ENSG00000149257, ENSG00000144810, ENSG00000204262, ENSG00000111799, ENSG00000187498, ENSG00000164692, ENSG00000060718, ENSG00000108821, ENSG00000149380	10	192	18224	94.9167	3.0468e-17	3.0468e-17	1.05e-15
Module 2	Biological process	GO:0030574	collagen catabolic process	0.125	8	72.7273	2.97747e-16	ENSG00000123500, ENSG00000144810, ENSG00000204262, ENSG00000111799, ENSG00000187498, ENSG00000164692, ENSG00000060718, ENSG00000108821	10	64	16792	209.9	2.83107e-14	2.83107e-14	3.55271e-13
Module 2	Cellular component	GO:0005581	collagen trimer	0.076087	7	63.6364	1.16398e-12	ENSG00000123500, ENSG00000149257, ENSG00000204262, ENSG00000111799, ENSG00000164692, ENSG00000060718, ENSG00000108821	10	92	18224	138.661	2.6771e-11	1.33855e-11	9.22595e-10
Module 2	Biological process	GO:0030199	collagen fibril organization	0.153846	6	54.5455	6.48042e-12	ENSG00000149257, ENSG00000204262, ENSG00000111799, ENSG00000164692, ENSG00000060718, ENSG00000108821	10	39	16792	258.338	5.50832e-10	2.75416e-10	6.97206e-09
Module 2	Biological process	GO:0030198	extracellular matrix organization	0.0357143	7	63.6364	1.91134e-10	ENSG00000123500, ENSG00000144810, ENSG00000204262, ENSG00000187498, ENSG00000164692, ENSG00000060718, ENSG00000108821	10	196	16792	59.9714	1.62464e-08	5.41545e-09	2.05635e-07
Module 2	Molecular function	GO:0005201	extracellular matrix structural constituent	0.0746269	5	45.4545	2.81288e-08	ENSG00000204262, ENSG00000187498, ENSG00000164692, ENSG00000060718, ENSG00000108821	10	67	16881	125.978	4.78189e-07	4.78189e-07	2.03667e-05
Module 2	Cellular component	GO:0031012	extracellular matrix	0.0202703	6	54.5455	1.30568e-07	ENSG00000144810, ENSG00000204262, ENSG00000111799, ENSG00000187498, ENSG00000164692, ENSG00000108821	10	296	18224	36.9405	3.00306e-06	1.00102e-06	0.000103493
Module 2	Biological process	GO:0001501	skeletal system development	0.0364964	5	45.4545	5.17623e-07	ENSG00000123500, ENSG00000204262, ENSG00000111799, ENSG00000164692, ENSG00000108821	10	137	16792	61.2847	4.3997e-05	1.09994e-05	0.000556895
Module 2	Cellular component	GO:0005576	extracellular region	0.00496894	8	72.7273	1.27309e-06	ENSG00000123500, ENSG00000144810, ENSG00000204262, ENSG00000111799, ENSG00000187498, ENSG00000164692, ENSG00000060718, ENSG00000108821	10	1610	18224	9.0554	2.92807e-05	7.32026e-06	0.00100909
Module 2	Biological process	GO:0071230	cellular response to amino acid stimulus	0.0851064	4	36.3636	1.70605e-06	ENSG00000204262, ENSG00000187498, ENSG00000164692, ENSG00000108821	10	47	16792	142.911	0.000145004	2.90025e-05	0.00183548
Module 2	Molecular function	GO:0048407	platelet-derived growth factor binding	0.272727	3	27.2727	1.38626e-05	ENSG00000187498, ENSG00000164692, ENSG00000108821	10	11	16881	460.391	0.000235638	0.000117826	0.0100368
Module 3	Cellular component	GO:0005576	extracellular region	0.00869565	14	87.5	1.69265e-12	ENSG00000157005, ENSG00000106366, ENSG00000122861, ENSG00000196611, ENSG00000130203, ENSG00000135744, ENSG00000113140, ENSG00000163739, ENSG00000138755, ENSG00000137673, ENSG00000118785, ENSG00000169245, ENSG00000102265, ENSG00000149968	16	1610	18224	9.90435	9.64808e-11	9.64808e-11	1.67778e-09
Module 3	Cellular component	GO:0005615	extracellular space	0.00965108	13	81.25	9.36881e-12	ENSG00000157005, ENSG00000106366, ENSG00000122861, ENSG00000130203, ENSG00000135744, ENSG00000113140, ENSG00000163739, ENSG00000138755, ENSG00000137673, ENSG00000118785, ENSG00000169245, ENSG00000102265, ENSG00000149968	16	1347	18224	10.9926	5.34024e-10	2.67012e-10	9.28658e-09
Module 3	Biological process	GO:0022617	extracellular matrix disassembly	0.0657895	5	31.25	5.09209e-07	ENSG00000137673, ENSG00000196611, ENSG00000118785, ENSG00000102265, ENSG00000149968	16	76	16792	69.0461	0.000177698	0.000177698	0.000696136
