# Supplementary material for: Identification of Potential Key Genes Associated With the Pathogenesis and Prognosis of Gastric Cancer Based on Integrated Bioinformatics Analysis
Source: Front Genet. 2018 Jul 17;9:265. doi: 10.3389/fgene.2018.00265 (PMC6056647; doi:10.3389/fgene.2018.00265)
Supplement: Supplementary file 10 [file Table_10.XLSX]

## Sheet: Sheet1
TABLE S10 KEGG pathway enrichment analysis of the DEGs in the three modules.
Group	KEGG ID	KEGG pathway	Class	Rich factor	Gene ratio	Background ratio	P value	adjust P value	Q value	Gene ID (Entrez ID)	Count
Module 1	hsa04115	p53 signaling pathway	Cellular Processes; Cell growth and death	0.0441176	3/5	68/7386	7.36755e-06	9.57781e-05	4.65319e-05	9133/983/891	3
Module 1	hsa04914	Progesterone-mediated oocyte maturation	Organismal Systems; Endocrine system	0.030303	3/5	99/7386	2.29125e-05	0.00014648	7.11646e-05	9133/983/891	3
Module 1	hsa04110	Cell cycle	Cellular Processes; Cell growth and death	0.0241935	3/5	124/7386	4.50709e-05	0.00014648	7.11646e-05	9133/983/891	3
Module 1	hsa04114	Oocyte meiosis	Cellular Processes; Cell growth and death	0.0241935	3/5	124/7386	4.50709e-05	0.00014648	7.11646e-05	9133/983/891	3
Module 1	hsa04218	Cellular senescence	Cellular Processes; Cell growth and death	0.01875	3/5	160/7386	9.66418e-05	0.000251269	0.000122074	9133/983/891	3
Module 1	hsa04068	FoxO signaling pathway	Environmental Information Processing; Signal transduction	0.0151515	2/5	132/7386	0.00306002	0.00663004	0.00322107	9133/891	2
Module 2	hsa04974	Protein digestion and absorption	Organismal Systems; Digestive system	0.0777778	7/8	90/7386	2.49457e-13	2.74403e-12	5.25172e-13	1300/1278/1277/1301/1290/1303/1282	7
Module 2	hsa04512	ECM-receptor interaction	Environmental Information Processing; Signaling molecules and interaction	0.0365854	3/8	82/7386	7.09649e-05	0.000342646	6.55781e-05	1278/1277/1282	3
Module 2	hsa05146	Amoebiasis	Human Diseases; Infectious diseases	0.03125	3/8	96/7386	0.000113676	0.000342646	6.55781e-05	1278/1277/1282	3
Module 2	hsa04933	AGE-RAGE signaling pathway in diabetic complications	Human Diseases; Endocrine and metabolic diseases	0.030303	3/8	99/7386	0.000124598	0.000342646	6.55781e-05	1278/1277/1282	3
Module 2	hsa04926	Relaxin signaling pathway	Organismal Systems; Endocrine system	0.0230769	3/8	130/7386	0.000279722	0.000615388	0.000117778	1278/1277/1282	3
Module 2	hsa04510	Focal adhesion	Cellular Processes; Cellular community - eukaryotes	0.0150754	3/8	199/7386	0.000976248	0.00178979	0.000342543	1278/1277/1282	3
Module 2	hsa05165	Human papillomavirus infection	Human Diseases; Infectious diseases	0.00940439	3/8	319/7386	0.00380075	0.00597261	0.00114308	1278/1277/1282	3
Module 2	hsa04151	PI3K-Akt signaling pathway	Environmental Information Processing; Signal transduction	0.00852273	3/8	352/7386	0.00502399	0.00690798	0.0013221	1278/1277/1282	3
Module 2	hsa04611	Platelet activation	Organismal Systems; Immune system	0.0162602	2/8	123/7386	0.00721327	0.00881622	0.00168731	1278/1277	2
Module 3	hsa04657	IL-17 signaling pathway	Organismal Systems; Immune system	0.0430108	4/15	93/7386	2.89182e-05	0.00130132	0.00103497	2919/3627/4314/4312	4
Module 3	hsa05323	Rheumatoid arthritis	Human Diseases; Immune diseases	0.0333333	3/15	90/7386	0.00071604	0.013694	0.0108911	2919/4314/4312	3
Module 3	hsa04620	Toll-like receptor signaling pathway	Organismal Systems; Immune system	0.0288462	3/15	104/7386	0.00109109	0.013694	0.0108911	6696/3627/4283	3
Module 3	hsa04668	TNF signaling pathway	Environmental Information Processing; Signal transduction	0.0277778	3/15	108/7386	0.00121724	0.013694	0.0108911	2919/3627/4314	3
